# Supplementary material for: The alpha/B.1.1.7 SARS-CoV-2 variant exhibits significantly higher affinity for ACE-2 and requires lower inoculation doses to cause disease in K18-hACE2 mice
Source: eLife. 2021 Nov 25;10:e70002. doi: 10.7554/eLife.70002 (PMC8635972; doi:10.7554/eLife.70002)
Supplement: Figure 1—source data 3. [file elife-70002-fig1-data3.xlsx]

## Sheet: Fig.1B HPLC
ACE-2 Fc			RBD wt			RBD N439K			RBD N501Y
Time (min)	FLD trace (-)	Purity (%) EMPOWER INTEGRATE	Time (min)	FLD trace (-)	Purity (%) EMPOWER INTEGRATE	Time (min)	FLD trace (-)	Purity (%) EMPOWER INTEGRATE	Time (min)	FLD trace (-)	Purity (%) EMPOWER INTEGRATE
0	0.341862	96.3	0	1.12977	99.4	0	0.329226	99.6	0	0.331753	99.7
0.0072	0.341755		0.0072	1.12974		0.0072	0.329149		0.0072	0.331676
0.0144	0.341719		0.0144	1.13023		0.0144	0.329161		0.0144	0.331599
0.0216	0.341731		0.0216	1.13153		0.0216	0.329304		0.0216	0.331539
0.0288	0.341791		0.0288	1.13394		0.0288	0.32962		0.0288	0.331545
0.036	0.34188		0.036	1.13769		0.036	0.330132		0.036	0.331634
0.0432	0.342017		0.0432	1.14294		0.0432	0.330871		0.0432	0.331867
0.0504	0.342226		0.0504	1.14962		0.0504	0.331861		0.0504	0.332254
0.0576	0.342548		0.0576	1.15752		0.0576	0.333071		0.0576	0.332809
0.0648	0.343013		0.0648	1.16619		0.0648	0.334454		0.0648	0.333524
0.072	0.343645		0.072	1.17506		0.072	0.33592		0.072	0.334352
0.0792	0.344455		0.0792	1.18349		0.0792	0.33738		0.0792	0.335228
0.0864	0.345433		0.0864	1.19088		0.0864	0.338715		0.0864	0.336075
0.0936	0.346523		0.0936	1.1968		0.0936	0.3398		0.0936	0.336808
0.1008	0.347686		0.1008	1.20102		0.1008	0.340575		0.1008	0.33738
0.108	0.348848		0.108	1.20359		0.108	0.34101		0.108	0.337744
0.1152	0.349969		0.1152	1.20478		0.1152	0.341159		0.1152	0.337935
0.1224	0.351006		0.1224	1.20499		0.1224	0.341117		0.1224	0.337976
0.1296	0.351953		0.1296	1.20475		0.1296	0.341034		0.1296	0.337982
0.1368	0.352842		0.1368	1.20453		0.1368	0.341046		0.1368	0.338054
0.144	0.3537		0.144	1.20482		0.144	0.341296		0.144	0.338364
0.1512	0.354588		0.1512	1.20589		0.1512	0.341874		0.1512	0.339061
0.1584	0.35553		0.1584	1.20789		0.1584	0.342852		0.1584	0.340331
0.1656	0.356561		0.1656	1.21083		0.1656	0.344276		0.1656	0.342244
0.1728	0.357676		0.1728	1.21462		0.1728	0.346148		0.1728	0.344861
0.18	0.358862		0.18	1.21909		0.18	0.348473		0.18	0.348139
0.1872	0.360102		0.1872	1.22406		0.1872	0.351208		0.1872	0.351989
0.1944	0.361347		0.1944	1.22933		0.1944	0.35432		0.1944	0.356233
0.2016	0.362563		0.2016	1.23468		0.2016	0.357747		0.2016	0.360644
0.2088	0.363702		0.2088	1.23995		0.2088	0.361407		0.2088	0.364947
0.216	0.364757		0.216	1.24497		0.216	0.365186		0.216	0.368887
0.2232	0.365704		0.2232	1.2496		0.2232	0.368917		0.2232	0.372255
0.2304	0.366527		0.2304	1.25371		0.2304	0.372398		0.2304	0.374955
0.2376	0.367224		0.2376	1.25716		0.2376	0.37545		0.2376	0.376952
0.2448	0.367791		0.2448	1.25986		0.2448	0.377941		0.2448	0.378287
0.252	0.368226		0.252	1.26174		0.252	0.379813		0.252	0.379056
0.2592	0.368542		0.2592	1.26275		0.2592	0.381029		0.2592	0.379389
0.2664	0.36872		0.2664	1.26293		0.2664	0.381643		0.2664	0.379443
0.2736	0.368792		0.2736	1.26231		0.2736	0.381732		0.2736	0.379354
0.2808	0.368738		0.2808	1.26104		0.2808	0.38144		0.2808	0.379223
0.288	0.368589		0.288	1.25926		0.288	0.380915		0.288	0.379109
0.2952	0.368357		0.2952	1.25717		0.2952	0.380302		0.2952	0.379002
0.3024	0.368047		0.3024	1.25495		0.3024	0.379682		0.3024	0.378901
0.3096	0.367689		0.3096	1.25275		0.3096	0.379121		0.3096	0.378794
0.3168	0.36732		0.3168	1.25069		0.3168	0.378627		0.3168	0.378662
0.324	0.366974		0.324	1.24883		0.324	0.378209		0.324	0.378501
0.3312	0.36667		0.3312	1.24716		0.3312	0.37784		0.3312	0.378305
0.3384	0.366414		0.3384	1.24564		0.3384	0.377524		0.3384	0.378084
0.3456	0.366205		0.3456	1.24422		0.3456	0.377226		0.3456	0.377846
0.3528	0.366026		0.3528	1.24286		0.3528	0.376946		0.3528	0.377595
0.36	0.365853		0.36	1.24149		0.36	0.376689		0.36	0.377339
0.3672	0.365675		0.3672	1.2401		0.3672	0.376463		0.3672	0.377071
0.3744	0.365442		0.3744	1.23866		0.3744	0.376272		0.3744	0.376785
0.3816	0.365162		0.3816	1.2372		0.3816	0.376153		0.3816	0.376463
0.3888	0.364822		0.3888	1.23574		0.3888	0.376099		0.3888	0.376105
0.396	0.364441		0.396	1.23432		0.396	0.376111		0.396	0.375694
0.4032	0.364047		0.4032	1.23295		0.4032	0.376171		0.4032	0.375253
0.4104	0.36366		0.4104	1.23169		0.4104	0.376266		0.4104	0.374782
0.4176	0.36329		0.4176	1.23056		0.4176	0.376391		0.4176	0.374323
0.4248	0.362974		0.4248	1.22957		0.4248	0.376522		0.4248	0.373906
0.432	0.362688		0.432	1.22876		0.432	0.376666		0.432	0.373548
0.4392	0.362444		0.4392	1.22812		0.4392	0.376803		0.4392	0.37328
0.4464	0.362235		0.4464	1.22765		0.4464	0.376916		0.4464	0.373095
0.4536	0.36205		0.4536	1.22735		0.4536	0.376999		0.4536	0.373018
0.4608	0.36189		0.4608	1.22721		0.4608	0.377035		0.4608	0.37303
0.468	0.361752		0.468	1.22722		0.468	0.377023		0.468	0.373119
0.4752	0.361645		0.4752	1.22732		0.4752	0.376952		0.4752	0.373262
0.4824	0.361556		0.4824	1.2275		0.4824	0.376827		0.4824	0.373417
0.4896	0.361496		0.4896	1.22772		0.4896	0.37666		0.4896	0.373572
0.4968	0.36146		0.4968	1.22795		0.4968	0.376457		0.4968	0.373709
0.504	0.361419		0.504	1.22814		0.504	0.376254		0.504	0.37384
0.5112	0.361365		0.5112	1.22827		0.5112	0.376076		0.5112	0.373936
0.5184	0.361294		0.5184	1.22829		0.5184	0.375938		0.5184	0.374013
0.5256	0.361204		0.5256	1.2282		0.5256	0.375855		0.5256	0.374067
0.5328	0.361085		0.5328	1.22798		0.5328	0.375831		0.5328	0.374097
0.54	0.360966		0.54	1.22763		0.54	0.375855		0.54	0.374126
0.5472	0.360847		0.5472	1.22719		0.5472	0.375903		0.5472	0.374144
0.5544	0.360763		0.5544	1.2267		0.5544	0.37595		0.5544	0.374144
0.5616	0.360709		0.5616	1.2262		0.5616	0.376004		0.5616	0.374109
0.5688	0.360721		0.5688	1.22572		0.5688	0.376034		0.5688	0.374043
0.576	0.360781		0.576	1.22528		0.576	0.376052		0.576	0.373936
0.5832	0.3609		0.5832	1.2249		0.5832	0.376052		0.5832	0.373793
0.5904	0.361073		0.5904	1.22457		0.5904	0.37601		0.5904	0.373626
0.5976	0.361288		0.5976	1.22429		0.5976	0.375944		0.5976	0.373447
0.6048	0.361538		0.6048	1.22401		0.6048	0.375861		0.6048	0.373268
0.612	0.361806		0.612	1.22372		0.612	0.375748		0.612	0.373101
0.6192	0.36208		0.6192	1.22342		0.6192	0.375599		0.6192	0.37297
0.6264	0.362331		0.6264	1.2231		0.6264	0.37542		0.6264	0.372899
0.6336	0.362551		0.6336	1.22279		0.6336	0.375211		0.6336	0.372922
0.6408	0.362724		0.6408	1.22249		0.6408	0.374973		0.6408	0.37303
0.648	0.362831		0.648	1.22221		0.648	0.374717		0.648	0.373232
0.6552	0.362873		0.6552	1.22195		0.6552	0.374454		0.6552	0.373501
0.6624	0.362861		0.6624	1.22172		0.6624	0.37421		0.6624	0.37381
0.6696	0.36279		0.6696	1.22153		0.6696	0.373995		0.6696	0.374138
0.6768	0.362694		0.6768	1.22138		0.6768	0.373823		0.6768	0.374424
0.684	0.362593		0.684	1.22129		0.684	0.373703		0.684	0.374645
0.6912	0.362486		0.6912	1.22125		0.6912	0.373638		0.6912	0.374752
0.6984	0.362384		0.6984	1.22128		0.6984	0.373644		0.6984	0.374728
0.7056	0.362277		0.7056	1.22138		0.7056	0.373703		0.7056	0.374579
0.7128	0.362152		0.7128	1.22156		0.7128	0.373799		0.7128	0.374347
0.72	0.362003		0.72	1.22181		0.72	0.373924		0.72	0.374079
0.7272	0.361824		0.7272	1.22212		0.7272	0.374037		0.7272	0.373823
0.7344	0.361615		0.7344	1.22246		0.7344	0.374115		0.7344	0.373602
0.7416	0.361395		0.7416	1.22277		0.7416	0.37415		0.7416	0.373441
0.7488	0.361186		0.7488	1.22305		0.7488	0.374138		0.7488	0.373334
0.756	0.361019		0.756	1.2233		0.756	0.374073		0.756	0.373304
0.7632	0.360918		0.7632	1.22351		0.7632	0.373954		0.7632	0.373316
0.7704	0.360894		0.7704	1.22367		0.7704	0.37381		0.7704	0.37334
0.7776	0.360942		0.7776	1.22378		0.7776	0.37365		0.7776	0.373352
0.7848	0.361025		0.7848	1.22385		0.7848	0.373524		0.7848	0.37334
0.792	0.361144		0.792	1.22387		0.792	0.373441		0.792	0.373298
0.7992	0.361258		0.7992	1.22384		0.7992	0.373405		0.7992	0.373232
0.8064	0.361347		0.8064	1.22377		0.8064	0.373417		0.8064	0.373173
0.8136	0.361389		0.8136	1.22366		0.8136	0.373477		0.8136	0.373119
0.8208	0.361389		0.8208	1.22353		0.8208	0.373554		0.8208	0.373077
0.828	0.361341		0.828	1.2234		0.828	0.37365		0.828	0.373059
0.8352	0.36127		0.8352	1.22331		0.8352	0.373751		0.8352	0.373071
0.8424	0.361192		0.8424	1.22325		0.8424	0.373834		0.8424	0.373131
0.8496	0.361115		0.8496	1.22324		0.8496	0.373912		0.8496	0.37322
0.8568	0.361049		0.8568	1.22325		0.8568	0.373977		0.8568	0.373334
0.864	0.360996		0.864	1.22327		0.864	0.374037		0.864	0.373459
0.8712	0.360948		0.8712	1.22326		0.8712	0.374115		0.8712	0.37359
0.8784	0.3609		0.8784	1.2232		0.8784	0.374204		0.8784	0.373721
0.8856	0.360847		0.8856	1.22308		0.8856	0.374293		0.8856	0.373846
0.8928	0.360787		0.8928	1.22293		0.8928	0.374383		0.8928	0.373954
0.9	0.360704		0.9	1.2228		0.9	0.374466		0.9	0.374049
0.9072	0.360614		0.9072	1.22274		0.9072	0.374532		0.9072	0.374138
0.9144	0.360519		0.9144	1.2228		0.9144	0.374579		0.9144	0.374246
0.9216	0.360429		0.9216	1.22299		0.9216	0.374591		0.9216	0.374359
0.9288	0.360358		0.9288	1.22333		0.9288	0.374556		0.9288	0.374496
0.936	0.360304		0.936	1.22379		0.936	0.374472		0.936	0.374627
0.9432	0.36028		0.9432	1.22431		0.9432	0.374335		0.9432	0.374752
0.9504	0.360286		0.9504	1.22482		0.9504	0.374168		0.9504	0.37486
0.9576	0.360304		0.9576	1.22524		0.9576	0.373983		0.9576	0.374919
0.9648	0.36034		0.9648	1.22552		0.9648	0.373793		0.9648	0.374913
0.972	0.360393		0.972	1.22562		0.972	0.373626		0.972	0.374836
0.9792	0.360459		0.9792	1.22556		0.9792	0.373501		0.9792	0.374681
0.9864	0.360537		0.9864	1.22538		0.9864	0.373423		0.9864	0.374454
0.9936	0.360632		0.9936	1.22511		0.9936	0.373423		0.9936	0.374192
1.0008	0.360733		1.0008	1.22481		1.0008	0.373483		1.0008	0.373888
1.008	0.360841		1.008	1.22449		1.008	0.373584		1.008	0.373566
1.0152	0.360954		1.0152	1.22421		1.0152	0.373703		1.0152	0.373244
1.0224	0.361085		1.0224	1.22399		1.0224	0.373805		1.0224	0.372934
1.0296	0.361204		1.0296	1.2238		1.0296	0.373888		1.0296	0.372648
1.0368	0.361299		1.0368	1.22365		1.0368	0.373918		1.0368	0.372386
1.044	0.361353		1.044	1.22349		1.044	0.3739		1.044	0.37213
1.0512	0.361365		1.0512	1.22333		1.0512	0.373834		1.0512	0.371885
1.0584	0.361323		1.0584	1.22316		1.0584	0.373703		1.0584	0.371665
1.0656	0.361246		1.0656	1.22297		1.0656	0.373536		1.0656	0.371468
1.0728	0.361121		1.0728	1.22277		1.0728	0.373328		1.0728	0.371313
1.08	0.360972		1.08	1.22256		1.08	0.373095		1.08	0.371188
1.0872	0.360805		1.0872	1.22237		1.0872	0.372839		1.0872	0.371105
1.0944	0.360644		1.0944	1.22223		1.0944	0.372583		1.0944	0.371081
1.1016	0.360531		1.1016	1.22213		1.1016	0.37235		1.1016	0.37111
1.1088	0.360477		1.1088	1.2221		1.1088	0.372159		1.1088	0.371218
1.116	0.360471		1.116	1.2221		1.116	0.372034		1.116	0.371403
1.1232	0.360495		1.1232	1.22212		1.1232	0.371981		1.1232	0.371635
1.1304	0.360525		1.1304	1.22214		1.1304	0.372022		1.1304	0.371921
1.1376	0.360537		1.1376	1.22214		1.1376	0.372142		1.1376	0.372255
1.1448	0.360507		1.1448	1.22211		1.1448	0.372314		1.1448	0.372624
1.152	0.360429		1.152	1.22204		1.152	0.372517		1.152	0.372994
1.1592	0.36028		1.1592	1.22197		1.1592	0.372726		1.1592	0.37337
1.1664	0.36009		1.1664	1.22189		1.1664	0.37291		1.1664	0.373709
1.1736	0.359899		1.1736	1.22187		1.1736	0.373059		1.1736	0.373995
1.1808	0.359732		1.1808	1.22191		1.1808	0.373167		1.1808	0.374228
1.188	0.359642		1.188	1.22203		1.188	0.373226		1.188	0.374389
1.1952	0.359648		1.1952	1.22223		1.1952	0.373262		1.1952	0.37449
1.2024	0.359756		1.2024	1.22247		1.2024	0.373262		1.2024	0.374544
1.2096	0.359935		1.2096	1.22273		1.2096	0.373256		1.2096	0.374544
1.2168	0.360155		1.2168	1.22296		1.2168	0.373244		1.2168	0.374508
1.224	0.36037		1.224	1.22314		1.224	0.37322		1.224	0.374436
1.2312	0.360531		1.2312	1.22324		1.2312	0.373167		1.2312	0.374341
1.2384	0.36062		1.2384	1.22324		1.2384	0.373083		1.2384	0.374204
1.2456	0.36062		1.2456	1.22316		1.2456	0.372964		1.2456	0.374031
1.2528	0.360542		1.2528	1.22304		1.2528	0.372809		1.2528	0.373823
1.26	0.360405		1.26	1.2229		1.26	0.372613		1.26	0.373566
1.2672	0.360227		1.2672	1.22281		1.2672	0.372398		1.2672	0.373286
1.2744	0.36006		1.2744	1.22278		1.2744	0.372177		1.2744	0.372982
1.2816	0.359929		1.2816	1.22283		1.2816	0.371987		1.2816	0.37266
1.2888	0.359845		1.2888	1.22294		1.2888	0.371867		1.2888	0.372344
1.296	0.359827		1.296	1.22314		1.296	0.37182		1.296	0.372034
1.3032	0.359851		1.3032	1.22338		1.3032	0.371844		1.3032	0.371748
1.3104	0.359911		1.3104	1.22364		1.3104	0.371927		1.3104	0.371492
1.3176	0.360012		1.3176	1.22389		1.3176	0.372022		1.3176	0.371265
1.3248	0.360125		1.3248	1.22408		1.3248	0.372136		1.3248	0.371075
1.332	0.360233		1.332	1.22423		1.332	0.372219		1.332	0.370932
1.3392	0.360328		1.3392	1.22429		1.3392	0.372255		1.3392	0.370848
1.3464	0.360382		1.3464	1.22429		1.3464	0.372231		1.3464	0.370836
1.3536	0.360405		1.3536	1.2242		1.3536	0.372154		1.3536	0.37089
1.3608	0.360388		1.3608	1.22405		1.3608	0.372064		1.3608	0.371015
1.368	0.360328		1.368	1.22384		1.368	0.371993		1.368	0.371188
1.3752	0.360221		1.3752	1.22359		1.3752	0.371945		1.3752	0.371397
1.3824	0.36009		1.3824	1.22333		1.3824	0.371945		1.3824	0.371611
1.3896	0.359947		1.3896	1.22307		1.3896	0.371969		1.3896	0.371808
1.3968	0.359803		1.3968	1.22288		1.3968	0.372016		1.3968	0.371969
1.404	0.359678		1.404	1.22276		1.404	0.372082		1.404	0.372076
1.4112	0.359589		1.4112	1.22272		1.4112	0.372154		1.4112	0.372124
1.4184	0.359547		1.4184	1.22279		1.4184	0.372201		1.4184	0.37213
1.4256	0.359577		1.4256	1.22294		1.4256	0.372231		1.4256	0.372094
1.4328	0.359666		1.4328	1.22318		1.4328	0.372261		1.4328	0.37204
1.44	0.359815		1.44	1.22346		1.44	0.372297		1.44	0.371969
1.4472	0.360006		1.4472	1.22374		1.4472	0.372356		1.4472	0.371891
1.4544	0.360221		1.4544	1.22401		1.4544	0.372434		1.4544	0.371796
1.4616	0.360435		1.4616	1.22421		1.4616	0.372517		1.4616	0.371683
1.4688	0.36062		1.4688	1.22436		1.4688	0.372583		1.4688	0.37154
1.476	0.360769		1.476	1.22442		1.476	0.372607		1.476	0.371367
1.4832	0.360847		1.4832	1.22442		1.4832	0.372583		1.4832	0.371188
1.4904	0.360858		1.4904	1.22433		1.4904	0.372493		1.4904	0.371033
1.4976	0.360799		1.4976	1.22419		1.4976	0.372344		1.4976	0.370914
1.5048	0.36068		1.5048	1.224		1.5048	0.372154		1.5048	0.370848
1.512	0.360525		1.512	1.22378		1.512	0.371927		1.512	0.370836
1.5192	0.360346		1.5192	1.22356		1.5192	0.371718		1.5192	0.370878
1.5264	0.360185		1.5264	1.22333		1.5264	0.37154		1.5264	0.370949
1.5336	0.360054		1.5336	1.22311		1.5336	0.371426		1.5336	0.371033
1.5408	0.359964		1.5408	1.22293		1.5408	0.371391		1.5408	0.371087
1.548	0.359935		1.548	1.22279		1.548	0.371426		1.548	0.371105
1.5552	0.359982		1.5552	1.2227		1.5552	0.371528		1.5552	0.371063
1.5624	0.360078		1.5624	1.22266		1.5624	0.371659		1.5624	0.370985
1.5696	0.360215		1.5696	1.22267		1.5696	0.371826		1.5696	0.370902
1.5768	0.36037		1.5768	1.22273		1.5768	0.372005		1.5768	0.370848
1.584	0.360513		1.584	1.22285		1.584	0.372171		1.584	0.370854
1.5912	0.360644		1.5912	1.223		1.5912	0.372297		1.5912	0.370926
1.5984	0.360721		1.5984	1.22321		1.5984	0.37238		1.5984	0.371075
1.6056	0.360751		1.6056	1.22344		1.6056	0.372434		1.6056	0.371271
1.6128	0.360709		1.6128	1.22368		1.6128	0.372469		1.6128	0.37151
1.62	0.360614		1.62	1.22392		1.62	0.372475		1.62	0.371748
1.6272	0.360459		1.6272	1.22414		1.6272	0.372469		1.6272	0.371951
1.6344	0.360268		1.6344	1.22431		1.6344	0.37244		1.6344	0.372088
1.6416	0.360054		1.6416	1.22442		1.6416	0.372392		1.6416	0.37213
1.6488	0.359839		1.6488	1.22446		1.6488	0.372338		1.6488	0.372094
1.656	0.359619		1.656	1.22445		1.656	0.372285		1.656	0.371993
1.6632	0.359422		1.6632	1.22439		1.6632	0.372243		1.6632	0.371856
1.6704	0.359255		1.6704	1.22432		1.6704	0.372213		1.6704	0.371695
1.6776	0.359136		1.6776	1.22426		1.6776	0.372225		1.6776	0.371557
1.6848	0.359064		1.6848	1.22422		1.6848	0.372279		1.6848	0.371444
1.692	0.35904		1.692	1.22421		1.692	0.372386		1.692	0.371385
1.6992	0.359046		1.6992	1.22422		1.6992	0.372553		1.6992	0.371367
1.7064	0.359088		1.7064	1.22423		1.7064	0.372738		1.7064	0.371397
1.7136	0.359136		1.7136	1.22424		1.7136	0.37294		1.7136	0.371444
1.7208	0.359196		1.7208	1.2242		1.7208	0.373113		1.7208	0.371486
1.728	0.359255		1.728	1.22409		1.728	0.373232		1.728	0.37151
1.7352	0.359303		1.7352	1.22391		1.7352	0.373268		1.7352	0.371516
1.7424	0.35935		1.7424	1.22367		1.7424	0.373208		1.7424	0.371504
1.7496	0.359386		1.7496	1.22337		1.7496	0.373065		1.7496	0.371498
1.7568	0.359428		1.7568	1.22305		1.7568	0.372833		1.7568	0.371504
1.764	0.359482		1.764	1.22272		1.764	0.372547		1.764	0.371534
1.7712	0.359523		1.7712	1.22244		1.7712	0.372237		1.7712	0.371611
1.7784	0.359547		1.7784	1.22218		1.7784	0.371939		1.7784	0.371712
1.7856	0.359535		1.7856	1.22199		1.7856	0.371706		1.7856	0.371832
1.7928	0.359482		1.7928	1.22184		1.7928	0.371546		1.7928	0.371951
1.8	0.359374		1.8	1.22176		1.8	0.371456		1.8	0.372052
1.8072	0.359231		1.8072	1.22172		1.8072	0.371438		1.8072	0.372118
1.8144	0.359052		1.8144	1.22171		1.8144	0.371462		1.8144	0.372142
1.8216	0.358862		1.8216	1.22172		1.8216	0.37154		1.8216	0.372124
1.8288	0.358683		1.8288	1.22172		1.8288	0.371617		1.8288	0.37207
1.836	0.358522		1.836	1.22175		1.836	0.371683		1.836	0.372005
1.8432	0.358397		1.8432	1.22181		1.8432	0.371736		1.8432	0.371957
1.8504	0.358301		1.8504	1.2219		1.8504	0.371772		1.8504	0.371927
1.8576	0.358224		1.8576	1.22201		1.8576	0.371808		1.8576	0.371927
1.8648	0.358158		1.8648	1.22216		1.8648	0.371873		1.8648	0.371945
1.872	0.358081		1.872	1.22234		1.872	0.371975		1.872	0.371975
1.8792	0.357992		1.8792	1.22257		1.8792	0.372118		1.8792	0.371987
1.8864	0.357884		1.8864	1.22284		1.8864	0.372302		1.8864	0.371957
1.8936	0.357777		1.8936	1.22313		1.8936	0.372523		1.8936	0.371885
1.9008	0.357664		1.9008	1.2234		1.9008	0.372762		1.9008	0.37176
1.908	0.357568		1.908	1.22366		1.908	0.372994		1.908	0.371581
1.9152	0.357491		1.9152	1.22387		1.9152	0.373197		1.9152	0.371379
1.9224	0.357449		1.9224	1.22402		1.9224	0.373352		1.9224	0.371194
1.9296	0.357437		1.9296	1.22407		1.9296	0.373441		1.9296	0.371075
1.9368	0.357449		1.9368	1.22403		1.9368	0.373453		1.9368	0.371051
1.944	0.357491		1.944	1.22389		1.944	0.373387		1.944	0.371128
1.9512	0.357562		1.9512	1.22365		1.9512	0.373256		1.9512	0.371307
1.9584	0.35767		1.9584	1.22333		1.9584	0.373077		1.9584	0.371557
1.9656	0.357807		1.9656	1.22296		1.9656	0.372875		1.9656	0.371873
1.9728	0.357968		1.9728	1.22257		1.9728	0.372672		1.9728	0.372219
1.98	0.35814		1.98	1.2222		1.98	0.372505		1.98	0.372547
1.9872	0.358325		1.9872	1.22189		1.9872	0.372392		1.9872	0.372839
1.9944	0.358492		1.9944	1.22169		1.9944	0.372356		1.9944	0.373054
2.0016	0.358647		2.0016	1.2216		2.0016	0.372404		2.0016	0.373203
2.0088	0.358784		2.0088	1.22162		2.0088	0.372529		2.0088	0.373274
2.016	0.35888		2.016	1.22175		2.016	0.372702		2.016	0.373274
2.0232	0.358945		2.0232	1.22197		2.0232	0.372905		2.0232	0.373179
2.0304	0.358975		2.0304	1.22225		2.0304	0.373101		2.0304	0.372988
2.0376	0.358963		2.0376	1.22256		2.0376	0.373268		2.0376	0.372714
2.0448	0.358897		2.0448	1.22286		2.0448	0.37337		2.0448	0.372386
2.052	0.358796		2.052	1.22314		2.052	0.373375		2.052	0.372034
2.0592	0.358635		2.0592	1.22338		2.0592	0.373292		2.0592	0.371671
2.0664	0.358432		2.0664	1.22359		2.0664	0.373113		2.0664	0.371355
2.0736	0.358212		2.0736	1.2238		2.0736	0.372845		2.0736	0.37111
2.0808	0.358003		2.0808	1.22399		2.0808	0.372535		2.0808	0.370967
2.088	0.357837		2.088	1.22419		2.088	0.372195		2.088	0.370943
2.0952	0.357753		2.0952	1.22439		2.0952	0.371885		2.0952	0.371033
2.1024	0.357789		2.1024	1.2246		2.1024	0.371623		2.1024	0.371194
2.1096	0.357944		2.1096	1.22481		2.1096	0.371444		2.1096	0.371397
2.1168	0.358236		2.1168	1.22501		2.1168	0.371367		2.1168	0.371623
2.124	0.358635		2.124	1.22518		2.124	0.371391		2.124	0.371838
2.1312	0.359106		2.1312	1.22532		2.1312	0.371498		2.1312	0.372011
2.1384	0.359595		2.1384	1.22541		2.1384	0.371653		2.1384	0.372154
2.1456	0.360054		2.1456	1.22545		2.1456	0.371826		2.1456	0.372249
2.1528	0.360441		2.1528	1.22547		2.1528	0.371981		2.1528	0.372326
2.16	0.360727		2.16	1.22547		2.16	0.372094		2.16	0.372398
2.1672	0.360894		2.1672	1.22548		2.1672	0.372159		2.1672	0.372469
2.1744	0.360936		2.1744	1.22551		2.1744	0.372183		2.1744	0.372565
2.1816	0.36087		2.1816	1.22556		2.1816	0.372171		2.1816	0.372678
2.1888	0.360733		2.1888	1.22563		2.1888	0.372142		2.1888	0.372809
2.196	0.360542		2.196	1.22571		2.196	0.372112		2.196	0.37297
2.2032	0.36034		2.2032	1.22577		2.2032	0.37207		2.2032	0.373137
2.2104	0.360167		2.2104	1.22579		2.2104	0.372022		2.2104	0.37331
2.2176	0.360036		2.2176	1.22575		2.2176	0.371975		2.2176	0.373465
2.2248	0.359952		2.2248	1.22563		2.2248	0.371909		2.2248	0.37359
2.232	0.359929		2.232	1.22542		2.232	0.371844		2.232	0.373661
2.2392	0.359952		2.2392	1.22517		2.2392	0.37179		2.2392	0.373656
2.2464	0.360006		2.2464	1.22487		2.2464	0.371742		2.2464	0.373572
2.2536	0.360048		2.2536	1.22458		2.2536	0.371712		2.2536	0.373423
2.2608	0.360078		2.2608	1.22432		2.2608	0.371712		2.2608	0.37322
2.268	0.360054		2.268	1.22408		2.268	0.37176		2.268	0.37297
2.2752	0.359988		2.2752	1.2239		2.2752	0.371838		2.2752	0.372696
2.2824	0.359881		2.2824	1.22377		2.2824	0.371927		2.2824	0.372428
2.2896	0.359732		2.2896	1.22368		2.2896	0.372011		2.2896	0.372189
2.2968	0.359553		2.2968	1.22364		2.2968	0.37207		2.2968	0.372005
2.304	0.359362		2.304	1.22362		2.304	0.3721		2.304	0.371867
2.3112	0.359166		2.3112	1.22361		2.3112	0.372112		2.3112	0.371778
2.3184	0.358999		2.3184	1.22361		2.3184	0.372088		2.3184	0.371724
2.3256	0.358868		2.3256	1.22359		2.3256	0.372028		2.3256	0.371712
2.3328	0.358766		2.3328	1.22356		2.3328	0.371933		2.3328	0.371742
2.34	0.358725		2.34	1.22352		2.34	0.371832		2.34	0.371808
2.3472	0.358725		2.3472	1.22346		2.3472	0.371724		2.3472	0.371915
2.3544	0.358766		2.3544	1.22341		2.3544	0.371611		2.3544	0.372052
2.3616	0.358856		2.3616	1.22336		2.3616	0.371498		2.3616	0.372213
2.3688	0.358957		2.3688	1.22334		2.3688	0.371379		2.3688	0.372386
2.376	0.359064		2.376	1.22334		2.376	0.371242		2.376	0.372565
2.3832	0.35916		2.3832	1.22337		2.3832	0.371093		2.3832	0.37272
2.3904	0.359237		2.3904	1.22343		2.3904	0.370943		2.3904	0.372833
2.3976	0.359261		2.3976	1.22352		2.3976	0.370783		2.3976	0.372893
2.4048	0.359261		2.4048	1.22359		2.4048	0.370628		2.4048	0.372893
2.412	0.359219		2.412	1.22364		2.412	0.370491		2.412	0.372833
2.4192	0.359166		2.4192	1.22366		2.4192	0.370389		2.4192	0.372756
2.4264	0.359106		2.4264	1.22364		2.4264	0.370341		2.4264	0.37266
2.4336	0.359046		2.4336	1.22358		2.4336	0.370354		2.4336	0.372577
2.4408	0.358993		2.4408	1.22352		2.4408	0.370419		2.4408	0.372523
2.448	0.358945		2.448	1.22345		2.448	0.370532		2.448	0.372493
2.4552	0.358915		2.4552	1.22341		2.4552	0.370675		2.4552	0.372505
2.4624	0.358886		2.4624	1.22341		2.4624	0.370836		2.4624	0.372559
2.4696	0.358856		2.4696	1.22346		2.4696	0.371009		2.4696	0.37263
2.4768	0.358826		2.4768	1.22357		2.4768	0.371152		2.4768	0.372702
2.484	0.35879		2.484	1.22371		2.484	0.371277		2.484	0.372773
2.4912	0.35876		2.4912	1.22387		2.4912	0.371355		2.4912	0.372827
2.4984	0.358731		2.4984	1.22402		2.4984	0.371391		2.4984	0.372863
2.5056	0.358719		2.5056	1.22414		2.5056	0.371391		2.5056	0.372899
2.5128	0.358719		2.5128	1.22421		2.5128	0.371343		2.5128	0.372922
2.52	0.358731		2.52	1.22426		2.52	0.37126		2.52	0.372946
2.5272	0.358754		2.5272	1.22427		2.5272	0.371146		2.5272	0.372964
2.5344	0.358784		2.5344	1.22427		2.5344	0.371009		2.5344	0.372976
2.5416	0.358808		2.5416	1.22429		2.5416	0.370872		2.5416	0.372982
2.5488	0.358814		2.5488	1.2243		2.5488	0.370765		2.5488	0.372976
2.556	0.358802		2.556	1.22432		2.556	0.370687		2.556	0.372952
2.5632	0.358766		2.5632	1.22435		2.5632	0.370663		2.5632	0.372893
2.5704	0.358701		2.5704	1.22435		2.5704	0.370687		2.5704	0.372827
2.5776	0.358629		2.5776	1.2243		2.5776	0.370747		2.5776	0.37275
2.5848	0.358564		2.5848	1.22423		2.5848	0.370848		2.5848	0.372672
2.592	0.358534		2.592	1.2241		2.592	0.370979		2.592	0.372595
2.5992	0.358546		2.5992	1.22396		2.5992	0.37111		2.5992	0.372505
2.6064	0.358623		2.6064	1.2238		2.6064	0.37123		2.6064	0.372416
2.6136	0.358772		2.6136	1.22367		2.6136	0.371319		2.6136	0.372332
2.6208	0.358963		2.6208	1.22354		2.6208	0.371379		2.6208	0.372255
2.628	0.359178		2.628	1.22346		2.628	0.371403		2.628	0.372189
2.6352	0.359392		2.6352	1.2234		2.6352	0.371367		2.6352	0.37213
2.6424	0.359559		2.6424	1.22338		2.6424	0.371295		2.6424	0.372082
2.6496	0.35966		2.6496	1.22335		2.6496	0.371164		2.6496	0.372064
2.6568	0.35966		2.6568	1.22331		2.6568	0.371003		2.6568	0.372064
2.664	0.359571		2.664	1.22327		2.664	0.370812		2.664	0.372088
2.6712	0.359398		2.6712	1.22321		2.6712	0.370604		2.6712	0.372124
2.6784	0.35916		2.6784	1.22315		2.6784	0.370395		2.6784	0.372154
2.6856	0.358909		2.6856	1.22306		2.6856	0.370204		2.6856	0.372171
2.6928	0.358671		2.6928	1.22296		2.6928	0.370049		2.6928	0.372159
2.7	0.35848		2.7	1.22284		2.7	0.369942		2.7	0.372106
2.7072	0.358361		2.7072	1.22273		2.7072	0.369895		2.7072	0.372005
2.7144	0.358325		2.7144	1.22263		2.7144	0.369901		2.7144	0.371862
2.7216	0.358355		2.7216	1.22255		2.7216	0.36996		2.7216	0.371683
2.7288	0.358415		2.7288	1.2225		2.7288	0.370079		2.7288	0.37148
2.736	0.358492		2.736	1.22251		2.736	0.370234		2.736	0.371265
2.7432	0.358564		2.7432	1.22257		2.7432	0.370431		2.7432	0.371063
2.7504	0.358588		2.7504	1.22269		2.7504	0.370652		2.7504	0.370884
2.7576	0.358558		2.7576	1.22286		2.7576	0.370872		2.7576	0.370765
2.7648	0.358474		2.7648	1.22305		2.7648	0.371105		2.7648	0.370711
2.772	0.358331		2.772	1.22323		2.772	0.371319		2.772	0.370729
2.7792	0.35817		2.7792	1.2234		2.7792	0.371516		2.7792	0.37083
2.7864	0.357997		2.7864	1.22353		2.7864	0.371671		2.7864	0.371021
2.7936	0.357848		2.7936	1.22363		2.7936	0.37179		2.7936	0.371271
2.8008	0.357723		2.8008	1.22369		2.8008	0.371873		2.8008	0.371569
2.808	0.357652		2.808	1.22371		2.808	0.371915		2.808	0.371885
2.8152	0.357616		2.8152	1.22372		2.8152	0.371921		2.8152	0.372189
2.8224	0.357616		2.8224	1.22372		2.8224	0.371891		2.8224	0.37244
2.8296	0.35764		2.8296	1.22372		2.8296	0.37182		2.8296	0.372624
2.8368	0.357664		2.8368	1.22376		2.8368	0.371712		2.8368	0.372732
2.844	0.357681		2.844	1.22382		2.844	0.371575		2.844	0.37275
2.8512	0.357687		2.8512	1.22391		2.8512	0.371426		2.8512	0.37269
2.8584	0.357687		2.8584	1.22403		2.8584	0.371283		2.8584	0.372565
2.8656	0.357676		2.8656	1.22418		2.8656	0.371146		2.8656	0.372392
2.8728	0.357681		2.8728	1.22435		2.8728	0.371039		2.8728	0.372201
2.88	0.357705		2.88	1.22452		2.88	0.370973		2.88	0.372011
2.8872	0.357765		2.8872	1.22471		2.8872	0.370955		2.8872	0.371832
2.8944	0.357854		2.8944	1.22487		2.8944	0.370985		2.8944	0.371695
2.9016	0.357974		2.9016	1.22502		2.9016	0.371033		2.9016	0.371569
2.9088	0.358081		2.9088	1.22514		2.9088	0.371075		2.9088	0.371498
2.916	0.358176		2.916	1.22521		2.916	0.371081		2.916	0.371456
2.9232	0.358218		2.9232	1.22525		2.9232	0.371021		2.9232	0.371468
2.9304	0.3582		2.9304	1.22525		2.9304	0.370908		2.9304	0.371522
2.9376	0.358117		2.9376	1.22523		2.9376	0.370723		2.9376	0.371623
2.9448	0.357956		2.9448	1.22517		2.9448	0.370491		2.9448	0.37176
2.952	0.357741		2.952	1.22508		2.952	0.370234		2.952	0.371939
2.9592	0.357497		2.9592	1.22496		2.9592	0.369984		2.9592	0.372165
2.9664	0.357258		2.9664	1.22482		2.9664	0.369775		2.9664	0.372422
2.9736	0.357044		2.9736	1.22468		2.9736	0.369644		2.9736	0.37269
2.9808	0.356871		2.9808	1.22454		2.9808	0.369596		2.9808	0.372958
2.988	0.356752		2.988	1.22436		2.988	0.36962		2.988	0.373197
2.9952	0.356674		2.9952	1.22417		2.9952	0.369698		2.9952	0.373393
3.0024	0.356662		3.0024	1.22395		3.0024	0.369793		3.0024	0.373524
3.0096	0.35671		3.0096	1.22375		3.0096	0.369895		3.0096	0.373572
3.0168	0.356787		3.0168	1.22356		3.0168	0.369978		3.0168	0.37353
3.024	0.356907		3.024	1.22337		3.024	0.370049		3.024	0.373393
3.0312	0.357062		3.0312	1.22321		3.0312	0.370079		3.0312	0.373173
3.0384	0.35724		3.0384	1.22307		3.0384	0.370073		3.0384	0.372887
3.0456	0.357461		3.0456	1.22299		3.0456	0.370044		3.0456	0.372571
3.0528	0.357717		3.0528	1.22299		3.0528	0.369996		3.0528	0.372255
3.06	0.357997		3.06	1.22303		3.06	0.36996		3.06	0.371981
3.0672	0.358295		3.0672	1.22311		3.0672	0.369942		3.0672	0.371796
3.0744	0.358576		3.0744	1.22323		3.0744	0.36993		3.0744	0.371718
3.0816	0.358832		3.0816	1.22336		3.0816	0.369948		3.0816	0.37176
3.0888	0.359034		3.0888	1.22349		3.0888	0.369978		3.0888	0.371921
3.096	0.359172		3.096	1.22359		3.096	0.370032		3.096	0.372177
3.1032	0.359225		3.1032	1.22364		3.1032	0.370097		3.1032	0.372481
3.1104	0.359201		3.1104	1.22364		3.1104	0.370169		3.1104	0.372797
3.1176	0.359106		3.1176	1.22359		3.1176	0.37021		3.1176	0.373071
3.1248	0.358951		3.1248	1.22349		3.1248	0.37024		3.1248	0.373274
3.132	0.358766		3.132	1.22336		3.132	0.370246		3.132	0.373375
3.1392	0.358576		3.1392	1.22321		3.1392	0.370228		3.1392	0.373375
3.1464	0.358403		3.1464	1.22305		3.1464	0.370192		3.1464	0.373286
3.1536	0.35826		3.1536	1.22291		3.1536	0.370133		3.1536	0.373143
3.1608	0.35814		3.1608	1.2228		3.1608	0.370061		3.1608	0.372952
3.168	0.358051		3.168	1.22269		3.168	0.370002		3.168	0.372767
3.1752	0.357974		3.1752	1.22259		3.1752	0.369942		3.1752	0.372571
3.1824	0.357902		3.1824	1.22247		3.1824	0.369912		3.1824	0.372398
3.1896	0.35783		3.1896	1.22235		3.1896	0.369901		3.1896	0.372231
3.1968	0.357765		3.1968	1.22221		3.1968	0.369912		3.1968	0.37207
3.204	0.357699		3.204	1.22205		3.204	0.36996		3.204	0.371921
3.2112	0.357634		3.2112	1.22188		3.2112	0.370061		3.2112	0.37176
3.2184	0.357598		3.2184	1.22172		3.2184	0.370204		3.2184	0.371623
3.2256	0.357586		3.2256	1.22158		3.2256	0.370365		3.2256	0.37151
3.2328	0.35761		3.2328	1.2215		3.2328	0.370526		3.2328	0.37145
3.24	0.357676		3.24	1.22149		3.24	0.370663		3.24	0.371456
3.2472	0.357765		3.2472	1.22156		3.2472	0.370747		3.2472	0.371528
3.2544	0.357866		3.2544	1.22171		3.2544	0.370759		3.2544	0.371653
3.2616	0.357944		3.2616	1.22189		3.2616	0.370687		3.2616	0.37182
3.2688	0.357986		3.2688	1.2221		3.2688	0.370532		3.2688	0.371981
3.276	0.357974		3.276	1.22231		3.276	0.3703		3.276	0.372112
3.2832	0.357884		3.2832	1.2225		3.2832	0.370032		3.2832	0.372183
3.2904	0.357729		3.2904	1.22266		3.2904	0.369769		3.2904	0.372183
3.2976	0.357521		3.2976	1.2228		3.2976	0.369537		3.2976	0.372118
3.3048	0.357282		3.3048	1.22288		3.3048	0.369358		3.3048	0.371993
3.312	0.357044		3.312	1.22295		3.312	0.369227		3.312	0.371849
3.3192	0.356823		3.3192	1.223		3.3192	0.369144		3.3192	0.371718
3.3264	0.356674		3.3264	1.22306		3.3264	0.369096		3.3264	0.371641
3.3336	0.356585		3.3336	1.22311		3.3336	0.369084		3.3336	0.371629
3.3408	0.356579		3.3408	1.22315		3.3408	0.369066		3.3408	0.371695
3.348	0.356633		3.348	1.22316		3.348	0.369042		3.348	0.371814
3.3552	0.356728		3.3552	1.22315		3.3552	0.369		3.3552	0.371963
3.3624	0.356835		3.3624	1.22311		3.3624	0.368965		3.3624	0.37213
3.3696	0.35693		3.3696	1.22307		3.3696	0.368941		3.3696	0.372279
3.3768	0.356984		3.3768	1.22305		3.3768	0.368953		3.3768	0.37238
3.384	0.356996		3.384	1.22306		3.384	0.369018		3.384	0.37241
3.3912	0.356972		3.3912	1.22314		3.3912	0.369138		3.3912	0.372362
3.3984	0.356936		3.3984	1.22329		3.3984	0.369304		3.3984	0.372255
3.4056	0.356889		3.4056	1.22353		3.4056	0.369507		3.4056	0.372088
3.4128	0.356871		3.4128	1.22384		3.4128	0.369734		3.4128	0.371879
3.42	0.356889		3.42	1.22418		3.42	0.36996		3.42	0.371653
3.4272	0.356954		3.4272	1.22451		3.4272	0.370192		3.4272	0.37142
3.4344	0.357056		3.4344	1.22477		3.4344	0.370407		3.4344	0.371206
3.4416	0.357193		3.4416	1.22494		3.4416	0.370616		3.4416	0.371021
3.4488	0.357348		3.4488	1.22498		3.4488	0.370812		3.4488	0.370878
3.456	0.357485		3.456	1.22489		3.456	0.370997		3.456	0.370795
3.4632	0.357592		3.4632	1.22468		3.4632	0.371176		3.4632	0.370771
3.4704	0.35767		3.4704	1.22439		3.4704	0.371337		3.4704	0.370812
3.4776	0.357693		3.4776	1.22406		3.4776	0.37148		3.4776	0.370896
3.4848	0.357681		3.4848	1.22374		3.4848	0.371569		3.4848	0.370997
3.492	0.357646		3.492	1.22348		3.492	0.371599		3.492	0.371098
3.4992	0.357592		3.4992	1.22332		3.4992	0.371551		3.4992	0.371176
3.5064	0.357544		3.5064	1.22325		3.5064	0.371426		3.5064	0.371236
3.5136	0.357497		3.5136	1.22327		3.5136	0.37123		3.5136	0.371254
3.5208	0.357467		3.5208	1.22337		3.5208	0.371003		3.5208	0.371242
3.528	0.357443		3.528	1.22353		3.528	0.370747		3.528	0.371206
3.5352	0.357431		3.5352	1.22369		3.5352	0.370491		3.5352	0.371158
3.5424	0.357407		3.5424	1.22384		3.5424	0.370264		3.5424	0.371134
3.5496	0.357372		3.5496	1.22393		3.5496	0.370079		3.5496	0.371152
3.5568	0.357318		3.5568	1.22395		3.5568	0.369936		3.5568	0.3712
3.564	0.357258		3.564	1.2239		3.564	0.369829		3.564	0.371283
3.5712	0.357193		3.5712	1.2238		3.5712	0.369752		3.5712	0.371385
3.5784	0.357151		3.5784	1.2237		3.5784	0.369686		3.5784	0.371486
3.5856	0.357133		3.5856	1.22362		3.5856	0.369626		3.5856	0.371599
3.5928	0.357151		3.5928	1.2236		3.5928	0.369585		3.5928	0.371695
3.6	0.357193		3.6	1.22367		3.6	0.369555		3.6	0.371772
3.6072	0.357258		3.6072	1.22384		3.6072	0.369537		3.6072	0.371814
3.6144	0.357318		3.6144	1.22409		3.6144	0.369519		3.6144	0.371808
3.6216	0.357372		3.6216	1.2244		3.6216	0.369513		3.6216	0.371772
3.6288	0.357401		3.6288	1.2247		3.6288	0.369501		3.6288	0.3717
3.636	0.357395		3.636	1.22495		3.636	0.369495		3.636	0.371587
3.6432	0.357348		3.6432	1.22508		3.6432	0.369489		3.6432	0.371432
3.6504	0.35727		3.6504	1.22511		3.6504	0.369507		3.6504	0.371242
3.6576	0.357181		3.6576	1.225		3.6576	0.369549		3.6576	0.371015
3.6648	0.357103		3.6648	1.22479		3.6648	0.369602		3.6648	0.370783
3.672	0.357056		3.672	1.2245		3.672	0.36968		3.672	0.370556
3.6792	0.35705		3.6792	1.2242		3.6792	0.369769		3.6792	0.370359
3.6864	0.357091		3.6864	1.22391		3.6864	0.369859		3.6864	0.370216
3.6936	0.357187		3.6936	1.22368		3.6936	0.369912		3.6936	0.370139
3.7008	0.357336		3.7008	1.22353		3.7008	0.36993		3.7008	0.370145
3.708	0.357527		3.708	1.22344		3.708	0.369895		3.708	0.370246
3.7152	0.357741		3.7152	1.22343		3.7152	0.369811		3.7152	0.370425
3.7224	0.357974		3.7224	1.22346		3.7224	0.369686		3.7224	0.370675
3.7296	0.358182		3.7296	1.22353		3.7296	0.369561		3.7296	0.370973
3.7368	0.358367		3.7368	1.22362		3.7368	0.36943		3.7368	0.371283
3.744	0.35851		3.744	1.22369		3.744	0.369328		3.744	0.371563
3.7512	0.358599		3.7512	1.22373		3.7512	0.369257		3.7512	0.371796
3.7584	0.358635		3.7584	1.22372		3.7584	0.369203		3.7584	0.371951
3.7656	0.358623		3.7656	1.22366		3.7656	0.369161		3.7656	0.372016
3.7728	0.358558		3.7728	1.22355		3.7728	0.369132		3.7728	0.372022
3.78	0.358462		3.78	1.22341		3.78	0.369108		3.78	0.371957
3.7872	0.358337		3.7872	1.22324		3.7872	0.369102		3.7872	0.371862
3.7944	0.358182		3.7944	1.22309		3.7944	0.369114		3.7944	0.371748
3.8016	0.358009		3.8016	1.22296		3.8016	0.369173		3.8016	0.371635
3.8088	0.357825		3.8088	1.22287		3.8088	0.369269		3.8088	0.37154
3.816	0.357628		3.816	1.22283		3.816	0.369406		3.816	0.371462
3.8232	0.357437		3.8232	1.22284		3.8232	0.369596		3.8232	0.371408
3.8304	0.357246		3.8304	1.22288		3.8304	0.369799		3.8304	0.371367
3.8376	0.357073		3.8376	1.22296		3.8376	0.369996		3.8376	0.371343
3.8448	0.356919		3.8448	1.22304		3.8448	0.370187		3.8448	0.371343
3.852	0.356793		3.852	1.22316		3.852	0.370354		3.852	0.371379
3.8592	0.356734		3.8592	1.22329		3.8592	0.370497		3.8592	0.371456
3.8664	0.356728		3.8664	1.22345		3.8664	0.37061		3.8664	0.371587
3.8736	0.356805		3.8736	1.22364		3.8736	0.370705		3.8736	0.37176
3.8808	0.356972		3.8808	1.22385		3.8808	0.370795		3.8808	0.371963
3.888	0.357217		3.888	1.22409		3.888	0.370872		3.888	0.372165
3.8952	0.357544		3.8952	1.22432		3.8952	0.370938		3.8952	0.372338
3.9024	0.357938		3.9024	1.22454		3.9024	0.370985		3.9024	0.372457
3.9096	0.358343		3.9096	1.22472		3.9096	0.370991		3.9096	0.372505
3.9168	0.358743		3.9168	1.22483		3.9168	0.370967		3.9168	0.372481
3.924	0.359076		3.924	1.22488		3.924	0.370902		3.924	0.372386
3.9312	0.359327		3.9312	1.22486		3.9312	0.370795		3.9312	0.372243
3.9384	0.359464		3.9384	1.2248		3.9384	0.37064		3.9384	0.372082
3.9456	0.359482		3.9456	1.22472		3.9456	0.370461		3.9456	0.371939
3.9528	0.359368		3.9528	1.22463		3.9528	0.370258		3.9528	0.371832
3.96	0.35916		3.96	1.22455		3.96	0.370055		3.96	0.371778
3.9672	0.358891		3.9672	1.22448		3.9672	0.369865		3.9672	0.37176
3.9744	0.358594		3.9744	1.2244		3.9744	0.369698		3.9744	0.371772
3.9816	0.358295		3.9816	1.22433		3.9816	0.369573		3.9816	0.371796
3.9888	0.358021		3.9888	1.22426		3.9888	0.369489		3.9888	0.371832
3.996	0.357801		3.996	1.22417		3.996	0.369477		3.996	0.371879
4.0032	0.35764		4.0032	1.22408		4.0032	0.369531		4.0032	0.371951
4.0104	0.357544		4.0104	1.22401		4.0104	0.369656		4.0104	0.372022
4.0176	0.357515		4.0176	1.22398		4.0176	0.369841		4.0176	0.37213
4.0248	0.357509		4.0248	1.22399		4.0248	0.370079		4.0248	0.372273
4.032	0.357521		4.032	1.22406		4.032	0.370359		4.032	0.372446
4.0392	0.357538		4.0392	1.22417		4.0392	0.370646		4.0392	0.372654
4.0464	0.35755		4.0464	1.22428		4.0464	0.370914		4.0464	0.372869
4.0536	0.357544		4.0536	1.22437		4.0536	0.371128		4.0536	0.373071
4.0608	0.357515		4.0608	1.22443		4.0608	0.371265		4.0608	0.373232
4.068	0.357461		4.068	1.22443		4.068	0.371307		4.068	0.373328
4.0752	0.357372		4.0752	1.2244		4.0752	0.371236		4.0752	0.373352
4.0824	0.357252		4.0824	1.22435		4.0824	0.371051		4.0824	0.373298
4.0896	0.357121		4.0896	1.22429		4.0896	0.370771		4.0896	0.373149
4.0968	0.356966		4.0968	1.22429		4.0968	0.370419		4.0968	0.372934
4.104	0.356805		4.104	1.22435		4.104	0.370044		4.104	0.372672
4.1112	0.356644		4.1112	1.22449		4.1112	0.369692		4.1112	0.37238
4.1184	0.356489		4.1184	1.2247		4.1184	0.369394		4.1184	0.372082
4.1256	0.356376		4.1256	1.22493		4.1256	0.369203		4.1256	0.371796
4.1328	0.356317		4.1328	1.22516		4.1328	0.369138		4.1328	0.371534
4.14	0.356334		4.14	1.22532		4.14	0.369197		4.14	0.371295
4.1472	0.356454		4.1472	1.2254		4.1472	0.369376		4.1472	0.371098
4.1544	0.356656		4.1544	1.22536		4.1544	0.369644		4.1544	0.370943
4.1616	0.35693		4.1616	1.22521		4.1616	0.36996		4.1616	0.370806
4.1688	0.357252		4.1688	1.22497		4.1688	0.370294		4.1688	0.370711
4.176	0.357586		4.176	1.22467		4.176	0.370598		4.176	0.370634
4.1832	0.357884		4.1832	1.22436		4.1832	0.37086		4.1832	0.370598
4.1904	0.358105		4.1904	1.22405		4.1904	0.371051		4.1904	0.370598
4.1976	0.35823		4.1976	1.22379		4.1976	0.371182		4.1976	0.37064
4.2048	0.358218		4.2048	1.22359		4.2048	0.371242		4.2048	0.370717
4.212	0.358111		4.212	1.22344		4.212	0.371242		4.212	0.370836
4.2192	0.357908		4.2192	1.22335		4.2192	0.3712		4.2192	0.370979
4.2264	0.357658		4.2264	1.22328		4.2264	0.371105		4.2264	0.37114
4.2336	0.35739		4.2336	1.22321		4.2336	0.370967		4.2336	0.371319
4.2408	0.357127		4.2408	1.22313		4.2408	0.3708		4.2408	0.371492
4.248	0.356895		4.248	1.22302		4.248	0.370604		4.248	0.371653
4.2552	0.35671		4.2552	1.2229		4.2552	0.370407		4.2552	0.371802
4.2624	0.356573		4.2624	1.22277		4.2624	0.370216		4.2624	0.371939
4.2696	0.356478		4.2696	1.22269		4.2696	0.370055		4.2696	0.37204
4.2768	0.356406		4.2768	1.22266		4.2768	0.369948		4.2768	0.3721
4.284	0.356346		4.284	1.22274		4.284	0.369901		4.284	0.3721
4.2912	0.356305		4.2912	1.22291		4.2912	0.369912		4.2912	0.37204
4.2984	0.356275		4.2984	1.22319		4.2984	0.369984		4.2984	0.371915
4.3056	0.356245		4.3056	1.22355		4.3056	0.370097		4.3056	0.37173
4.3128	0.356221		4.3128	1.22398		4.3128	0.370234		4.3128	0.371504
4.32	0.356179		4.32	1.22442		4.32	0.370377		4.32	0.371248
4.3272	0.356132		4.3272	1.22484		4.3272	0.370508		4.3272	0.370991
4.3344	0.356072		4.3344	1.2252		4.3344	0.37061		4.3344	0.370771
4.3416	0.356025		4.3416	1.22548		4.3416	0.370657		4.3416	0.37061
4.3488	0.355983		4.3488	1.22566		4.3488	0.370657		4.3488	0.370538
4.356	0.355947		4.356	1.22577		4.356	0.370586		4.356	0.370568
4.3632	0.355935		4.3632	1.22579		4.3632	0.370467		4.3632	0.370681
4.3704	0.355923		4.3704	1.22575		4.3704	0.3703		4.3704	0.370872
4.3776	0.355899		4.3776	1.22563		4.3776	0.370115		4.3776	0.371105
4.3848	0.355858		4.3848	1.22544		4.3848	0.369918		4.3848	0.371361
4.392	0.355774		4.392	1.22521		4.392	0.369728		4.392	0.371575
4.3992	0.355649		4.3992	1.22495		4.3992	0.369561		4.3992	0.371718
4.4064	0.355476		4.4064	1.22467		4.4064	0.36943		4.4064	0.371778
4.4136	0.355291		4.4136	1.22439		4.4136	0.369346		4.4136	0.371718
4.4208	0.355089		4.4208	1.22414		4.4208	0.369298		4.4208	0.371563
4.428	0.354916		4.428	1.22393		4.428	0.369269		4.428	0.371337
4.4352	0.354803		4.4352	1.22378		4.4352	0.369221		4.4352	0.371069
4.4424	0.354773		4.4424	1.22374		4.4424	0.369138		4.4424	0.370806
4.4496	0.35482		4.4496	1.22377		4.4496	0.369018		4.4496	0.37058
4.4568	0.354963		4.4568	1.22387		4.4568	0.368857		4.4568	0.370425
4.464	0.355172		4.464	1.22402		4.464	0.368679		4.464	0.370365
4.4712	0.355452		4.4712	1.22419		4.4712	0.368488		4.4712	0.370389
4.4784	0.355762		4.4784	1.22439		4.4784	0.368327		4.4784	0.370473
4.4856	0.356096		4.4856	1.22461		4.4856	0.36822		4.4856	0.370592
4.4928	0.356424		4.4928	1.22485		4.4928	0.368196		4.4928	0.370711
4.5	0.356728		4.5	1.22509		4.5	0.368249		4.5	0.370806
4.5072	0.356972		4.5072	1.22534		4.5072	0.368375		4.5072	0.370872
4.5144	0.357163		4.5144	1.2256		4.5144	0.368553		4.5144	0.370902
4.5216	0.357282		4.5216	1.22585		4.5216	0.368744		4.5216	0.370902
4.5288	0.357336		4.5288	1.22609		4.5288	0.368905		4.5288	0.370896
4.536	0.35733		4.536	1.22629		4.536	0.369012		4.536	0.37089
4.5432	0.357294		4.5432	1.22645		4.5432	0.36906		4.5432	0.37092
4.5504	0.357258		4.5504	1.22656		4.5504	0.369042		4.5504	0.370973
4.5576	0.35724		4.5576	1.22662		4.5576	0.368977		4.5576	0.371063
4.5648	0.357258		4.5648	1.22665		4.5648	0.368863		4.5648	0.371152
4.572	0.357312		4.572	1.22663		4.572	0.368738		4.572	0.37123
4.5792	0.357413		4.5792	1.22659		4.5792	0.368625		4.5792	0.371277
4.5864	0.357515		4.5864	1.22651		4.5864	0.368553		4.5864	0.371283
4.5936	0.357622		4.5936	1.2264		4.5936	0.368547		4.5936	0.371254
4.6008	0.357693		4.6008	1.22625		4.6008	0.368607		4.6008	0.371206
4.608	0.357723		4.608	1.22605		4.608	0.368714		4.608	0.371158
4.6152	0.357693		4.6152	1.2258		4.6152	0.368863		4.6152	0.371128
4.6224	0.357616		4.6224	1.2255		4.6224	0.369036		4.6224	0.37114
4.6296	0.357503		4.6296	1.22516		4.6296	0.369233		4.6296	0.371194
4.6368	0.357366		4.6368	1.2248		4.6368	0.369436		4.6368	0.371295
4.644	0.35724		4.644	1.22442		4.644	0.369632		4.644	0.371426
4.6512	0.357139		4.6512	1.22404		4.6512	0.369811		4.6512	0.371587
4.6584	0.357062		4.6584	1.22367		4.6584	0.369966		4.6584	0.37173
4.6656	0.357038		4.6656	1.22334		4.6656	0.370103		4.6656	0.371844
4.6728	0.35705		4.6728	1.22305		4.6728	0.370246		4.6728	0.371897
4.68	0.357091		4.68	1.22284		4.68	0.370371		4.68	0.371897
4.6872	0.357133		4.6872	1.22271		4.6872	0.370497		4.6872	0.371844
4.6944	0.357139		4.6944	1.22266		4.6944	0.370598		4.6944	0.371748
4.7016	0.357103		4.7016	1.22271		4.7016	0.370663		4.7016	0.371611
4.7088	0.357008		4.7088	1.22284		4.7088	0.370705		4.7088	0.371462
4.716	0.356847		4.716	1.22305		4.716	0.370717		4.716	0.371313
4.7232	0.35665		4.7232	1.22327		4.7232	0.370705		4.7232	0.371182
4.7304	0.35643		4.7304	1.22349		4.7304	0.370669		4.7304	0.371081
4.7376	0.356233		4.7376	1.22369		4.7376	0.370628		4.7376	0.370997
4.7448	0.356102		4.7448	1.22383		4.7448	0.370586		4.7448	0.370926
4.752	0.356078		4.752	1.22393		4.752	0.37055		4.752	0.370866
4.7592	0.356197		4.7592	1.22398		4.7592	0.370532		4.7592	0.370812
4.7664	0.356454		4.7664	1.22401		4.7664	0.370526		4.7664	0.370771
4.7736	0.356841		4.7736	1.22402		4.7736	0.370526		4.7736	0.370735
4.7808	0.357354		4.7808	1.22404		4.7808	0.370532		4.7808	0.370687
4.788	0.357968		4.788	1.22408		4.788	0.37052		4.788	0.370628
4.7952	0.358665		4.7952	1.22413		4.7952	0.370508		4.7952	0.370574
4.8024	0.359452		4.8024	1.22418		4.8024	0.370503		4.8024	0.370532
4.8096	0.360316		4.8096	1.22421		4.8096	0.370514		4.8096	0.370497
4.8168	0.36127		4.8168	1.22421		4.8168	0.370544		4.8168	0.370467
4.824	0.362355		4.824	1.22417		4.824	0.37061		4.824	0.370437
4.8312	0.363594		4.8312	1.22406		4.8312	0.370687		4.8312	0.370419
4.8384	0.365025		4.8384	1.22389		4.8384	0.370765		4.8384	0.370425
4.8456	0.36667		4.8456	1.22366		4.8456	0.370836		4.8456	0.370461
4.8528	0.368577		4.8528	1.2234		4.8528	0.370872		4.8528	0.37052
4.86	0.370765		4.86	1.22313		4.86	0.370866		4.86	0.370592
4.8672	0.373274		4.8672	1.22286		4.8672	0.370795		4.8672	0.370681
4.8744	0.376129		4.8744	1.22262		4.8744	0.37064		4.8744	0.370789
4.8816	0.379348		4.8816	1.22242		4.8816	0.370425		4.8816	0.370902
4.8888	0.382924		4.8888	1.22228		4.8888	0.370187		4.8888	0.371015
4.896	0.386888		4.896	1.2222		4.896	0.369936		4.896	0.371105
4.9032	0.391221		4.9032	1.22219		4.9032	0.369698		4.9032	0.37117
4.9104	0.395912		4.9104	1.22223		4.9104	0.369477		4.9104	0.371194
4.9176	0.400943		4.9176	1.22231		4.9176	0.369293		4.9176	0.371182
4.9248	0.406301		4.9248	1.2224		4.9248	0.369144		4.9248	0.371146
4.932	0.411952		4.932	1.22248		4.932	0.369036		4.932	0.371087
4.9392	0.417888		4.9392	1.22256		4.9392	0.368953		4.9392	0.371015
4.9464	0.424093		4.9464	1.2226		4.9464	0.368887		4.9464	0.370949
4.9536	0.430542		4.9536	1.2226		4.9536	0.368845		4.9536	0.370908
4.9608	0.437248		4.9608	1.22259		4.9608	0.368822		4.9608	0.370896
4.968	0.444204		4.968	1.22254		4.968	0.368845		4.968	0.370943
4.9752	0.451404		4.9752	1.22249		4.9752	0.368905		4.9752	0.371033
4.9824	0.458831		4.9824	1.22244		4.9824	0.369018		4.9824	0.371158
4.9896	0.466484		4.9896	1.22238		4.9896	0.369155		4.9896	0.371301
4.9968	0.474352		4.9968	1.22232		4.9968	0.36931		4.9968	0.371426
5.004	0.482422		5.004	1.22227		5.004	0.369465		5.004	0.37151
5.0112	0.490677		5.0112	1.2222		5.0112	0.36959		5.0112	0.371546
5.0184	0.499099		5.0184	1.22214		5.0184	0.369674		5.0184	0.371522
5.0256	0.507677		5.0256	1.22204		5.0256	0.369692		5.0256	0.371456
5.0328	0.516397		5.0328	1.22194		5.0328	0.369656		5.0328	0.371385
5.04	0.525266		5.04	1.22183		5.04	0.369561		5.04	0.371319
5.0472	0.534284		5.0472	1.22172		5.0472	0.36943		5.0472	0.371313
5.0544	0.543445		5.0544	1.22162		5.0544	0.369263		5.0544	0.371379
5.0616	0.552744		5.0616	1.22154		5.0616	0.369084		5.0616	0.371522
5.0688	0.562167		5.0688	1.22148		5.0688	0.368899		5.0688	0.371724
5.076	0.571698		5.076	1.22146		5.076	0.368714		5.076	0.371957
5.0832	0.581336		5.0832	1.22147		5.0832	0.368565		5.0832	0.372183
5.0904	0.591087		5.0904	1.22152		5.0904	0.368446		5.0904	0.372386
5.0976	0.600946		5.0976	1.2216		5.0976	0.368404		5.0976	0.372541
5.1048	0.610936		5.1048	1.2217		5.1048	0.368434		5.1048	0.372648
5.112	0.621086		5.112	1.22181		5.112	0.368559		5.112	0.372708
5.1192	0.631422		5.1192	1.22193		5.1192	0.368774		5.1192	0.37275
5.1264	0.641984		5.1264	1.22203		5.1264	0.369078		5.1264	0.372779
5.1336	0.652802		5.1336	1.22211		5.1336	0.36943		5.1336	0.372821
5.1408	0.663876		5.1408	1.22214		5.1408	0.369781		5.1408	0.372887
5.148	0.675213		5.148	1.22213		5.148	0.370115		5.148	0.37297
5.1552	0.686818		5.1552	1.22207		5.1552	0.370377		5.1552	0.373054
5.1624	0.698674		5.1624	1.222		5.1624	0.37055		5.1624	0.373137
5.1696	0.710809		5.1696	1.22191		5.1696	0.37064		5.1696	0.373208
5.1768	0.723237		5.1768	1.22182		5.1768	0.370646		5.1768	0.373256
5.184	0.735992		5.184	1.22176		5.184	0.370604		5.184	0.373286
5.1912	0.749087		5.1912	1.22173		5.1912	0.370538		5.1912	0.373274
5.1984	0.762588		5.1984	1.22174		5.1984	0.370479		5.1984	0.373238
5.2056	0.776511		5.2056	1.22177		5.2056	0.370443		5.2056	0.373161
5.2128	0.790894		5.2128	1.22182		5.2128	0.370437		5.2128	0.373054
5.22	0.805724		5.22	1.22187		5.22	0.370443		5.22	0.37291
5.2272	0.821012		5.2272	1.22191		5.2272	0.370455		5.2272	0.372744
5.2344	0.836754		5.2344	1.22196		5.2344	0.370455		5.2344	0.372541
5.2416	0.852948		5.2416	1.222		5.2416	0.370425		5.2416	0.372332
5.2488	0.869608		5.2488	1.22206		5.2488	0.370354		5.2488	0.372148
5.256	0.886744		5.256	1.22214		5.256	0.370252		5.256	0.371981
5.2632	0.904381		5.2632	1.22225		5.2632	0.370127		5.2632	0.371873
5.2704	0.922549		5.2704	1.22237		5.2704	0.370002		5.2704	0.371814
5.2776	0.941277		5.2776	1.22251		5.2776	0.369906		5.2776	0.371832
5.2848	0.960612		5.2848	1.22262		5.2848	0.369853		5.2848	0.371909
5.292	0.980568		5.292	1.2227		5.292	0.369865		5.292	0.372028
5.2992	1.00117		5.2992	1.22271		5.2992	0.369972		5.2992	0.372189
5.3064	1.02243		5.3064	1.22265		5.3064	0.370157		5.3064	0.372368
5.3136	1.04438		5.3136	1.2225		5.3136	0.370413		5.3136	0.372529
5.3208	1.06704		5.3208	1.22231		5.3208	0.370723		5.3208	0.372684
5.328	1.09041		5.328	1.22209		5.328	0.371051		5.328	0.372809
5.3352	1.11451		5.3352	1.22186		5.3352	0.371361		5.3352	0.372905
5.3424	1.13936		5.3424	1.22166		5.3424	0.371635		5.3424	0.372976
5.3496	1.16496		5.3496	1.2215		5.3496	0.371838		5.3496	0.373042
5.3568	1.19134		5.3568	1.2214		5.3568	0.371969		5.3568	0.373095
5.364	1.21852		5.364	1.22134		5.364	0.372022		5.364	0.373173
5.3712	1.24649		5.3712	1.22131		5.3712	0.372022		5.3712	0.373268
5.3784	1.27527		5.3784	1.22131		5.3784	0.371981		5.3784	0.373381
5.3856	1.30483		5.3856	1.22131		5.3856	0.371933		5.3856	0.373513
5.3928	1.3352		5.3928	1.22131		5.3928	0.371897		5.3928	0.373638
5.4	1.36633		5.4	1.22132		5.4	0.371891		5.4	0.373763
5.4072	1.39819		5.4072	1.2214		5.4072	0.371909		5.4072	0.373882
5.4144	1.4307		5.4144	1.22151		5.4144	0.371951		5.4144	0.373995
5.4216	1.46377		5.4216	1.22169		5.4216	0.371975		5.4216	0.374097
5.4288	1.4973		5.4288	1.22194		5.4288	0.371975		5.4288	0.374204
5.436	1.53118		5.436	1.22224		5.436	0.371933		5.436	0.374317
5.4432	1.56521		5.4432	1.22259		5.4432	0.371832		5.4432	0.374436
5.4504	1.59922		5.4504	1.22292		5.4504	0.371677		5.4504	0.374561
5.4576	1.63298		5.4576	1.2232		5.4576	0.371474		5.4576	0.374675
5.4648	1.66621		5.4648	1.22339		5.4648	0.371242		5.4648	0.374758
5.472	1.69858		5.472	1.22347		5.472	0.371027		5.472	0.374782
5.4792	1.72971		5.4792	1.22344		5.4792	0.370854		5.4792	0.374723
5.4864	1.75917		5.4864	1.22331		5.4864	0.370753		5.4864	0.374579
5.4936	1.78651		5.4936	1.22313		5.4936	0.370723		5.4936	0.374365
5.5008	1.81124		5.5008	1.22293		5.5008	0.370783		5.5008	0.374103
5.508	1.83291		5.508	1.22273		5.508	0.37092		5.508	0.373823
5.5152	1.85106		5.5152	1.22257		5.5152	0.37111		5.5152	0.373566
5.5224	1.86527		5.5224	1.22245		5.5224	0.371343		5.5224	0.373375
5.5296	1.87516		5.5296	1.22238		5.5296	0.371569		5.5296	0.373274
5.5368	1.88041		5.5368	1.22232		5.5368	0.371784		5.5368	0.373274
5.544	1.88079		5.544	1.22227		5.544	0.371975		5.544	0.373393
5.5512	1.87615		5.5512	1.22222		5.5512	0.372118		5.5512	0.373602
5.5584	1.86641		5.5584	1.22216		5.5584	0.372231		5.5584	0.373876
5.5656	1.85167		5.5656	1.2221		5.5656	0.372302		5.5656	0.374192
5.5728	1.83213		5.5728	1.22207		5.5728	0.372332		5.5728	0.374502
5.58	1.80814		5.58	1.22209		5.58	0.37232		5.58	0.374788
5.5872	1.78018		5.5872	1.22217		5.5872	0.372267		5.5872	0.37502
5.5944	1.74888		5.5944	1.22234		5.5944	0.372189		5.5944	0.375175
5.6016	1.7149		5.6016	1.22259		5.6016	0.372082		5.6016	0.375253
5.6088	1.67897		5.6088	1.22293		5.6088	0.371957		5.6088	0.375235
5.616	1.64179		5.616	1.22331		5.616	0.371808		5.616	0.375146
5.6232	1.60406		5.6232	1.22371		5.6232	0.371659		5.6232	0.375003
5.6304	1.56637		5.6304	1.2241		5.6304	0.37154		5.6304	0.37483
5.6376	1.52929		5.6376	1.22443		5.6376	0.371456		5.6376	0.374639
5.6448	1.49324		5.6448	1.22469		5.6448	0.371408		5.6448	0.374466
5.652	1.45856		5.652	1.22485		5.652	0.371426		5.652	0.374323
5.6592	1.42547		5.6592	1.22489		5.6592	0.371492		5.6592	0.37424
5.6664	1.39417		5.6664	1.22483		5.6664	0.371611		5.6664	0.374216
5.6736	1.36475		5.6736	1.22466		5.6736	0.371772		5.6736	0.374252
5.6808	1.33727		5.6808	1.22443		5.6808	0.371933		5.6808	0.374359
5.688	1.3117		5.688	1.22417		5.688	0.372082		5.688	0.374508
5.6952	1.28798		5.6952	1.2239		5.6952	0.372171		5.6952	0.374705
5.7024	1.26604		5.7024	1.22361		5.7024	0.372201		5.7024	0.374895
5.7096	1.24575		5.7096	1.22335		5.7096	0.372154		5.7096	0.375068
5.7168	1.22701		5.7168	1.22312		5.7168	0.37204		5.7168	0.375169
5.724	1.20967		5.724	1.22292		5.724	0.371885		5.724	0.375187
5.7312	1.19361		5.7312	1.22275		5.7312	0.371712		5.7312	0.37511
5.7384	1.17872		5.7384	1.22259		5.7384	0.371563		5.7384	0.374931
5.7456	1.16488		5.7456	1.22244		5.7456	0.371492		5.7456	0.374663
5.7528	1.15201		5.7528	1.22229		5.7528	0.371516		5.7528	0.374335
5.76	1.13999		5.76	1.22216		5.76	0.371641		5.76	0.373995
5.7672	1.12875		5.7672	1.22204		5.7672	0.371862		5.7672	0.373673
5.7744	1.11821		5.7744	1.22194		5.7744	0.372148		5.7744	0.373417
5.7816	1.10832		5.7816	1.22183		5.7816	0.37244		5.7816	0.373226
5.7888	1.09902		5.7888	1.22172		5.7888	0.372702		5.7888	0.373101
5.796	1.09028		5.796	1.22161		5.796	0.372875		5.796	0.373036
5.8032	1.08204		5.8032	1.22152		5.8032	0.372946		5.8032	0.373012
5.8104	1.07428		5.8104	1.22143		5.8104	0.372899		5.8104	0.372988
5.8176	1.06695		5.8176	1.22136		5.8176	0.37275		5.8176	0.37297
5.8248	1.06001		5.8248	1.22132		5.8248	0.372529		5.8248	0.372922
5.832	1.05345		5.832	1.22132		5.832	0.372261		5.832	0.372845
5.8392	1.04719		5.8392	1.2214		5.8392	0.371981		5.8392	0.372744
5.8464	1.04122		5.8464	1.22153		5.8464	0.371736		5.8464	0.372636
5.8536	1.0355		5.8536	1.22173		5.8536	0.371534		5.8536	0.372511
5.8608	1.03003		5.8608	1.22197		5.8608	0.371408		5.8608	0.372416
5.868	1.02482		5.868	1.22224		5.868	0.371343		5.868	0.372338
5.8752	1.01986		5.8752	1.22253		5.8752	0.371349		5.8752	0.372308
5.8824	1.01517		5.8824	1.22279		5.8824	0.37142		5.8824	0.372326
5.8896	1.01079		5.8896	1.22302		5.8896	0.371563		5.8896	0.372404
5.8968	1.00672		5.8968	1.22319		5.8968	0.371754		5.8968	0.372535
5.904	1.003		5.904	1.22331		5.904	0.371975		5.904	0.372702
5.9112	0.999594		5.9112	1.22337		5.9112	0.372207		5.9112	0.372899
5.9184	0.996512		5.9184	1.22338		5.9184	0.372422		5.9184	0.373101
5.9256	0.993711		5.9256	1.22334		5.9256	0.372601		5.9256	0.373298
5.9328	0.991166		5.9328	1.22326		5.9328	0.372726		5.9328	0.373471
5.94	0.988805		5.94	1.22314		5.94	0.372779		5.94	0.37362
5.9472	0.986582		5.9472	1.22299		5.9472	0.372773		5.9472	0.373727
5.9544	0.984442		5.9544	1.22281		5.9544	0.372714		5.9544	0.37381
5.9616	0.982344		5.9616	1.22261		5.9616	0.372607		5.9616	0.373858
5.9688	0.98027		5.9688	1.2224		5.9688	0.372493		5.9688	0.373882
5.976	0.978213		5.976	1.2222		5.976	0.372386		5.976	0.373882
5.9832	0.976187		5.9832	1.22206		5.9832	0.372291		5.9832	0.373852
5.9904	0.97419		5.9904	1.22195		5.9904	0.372231		5.9904	0.373787
5.9976	0.972259		5.9976	1.22194		5.9976	0.372201		5.9976	0.373691
6.0048	0.970411		6.0048	1.22199		6.0048	0.372201		6.0048	0.373572
6.012	0.968665		6.012	1.22211		6.012	0.372201		6.012	0.373435
6.0192	0.967014		6.0192	1.22228		6.0192	0.372219		6.0192	0.373304
6.0264	0.965452		6.0264	1.22248		6.0264	0.372237		6.0264	0.373197
6.0336	0.963956		6.0336	1.22266		6.0336	0.372273		6.0336	0.373119
6.0408	0.962538		6.0408	1.2228		6.0408	0.372326		6.0408	0.373107
6.048	0.961184		6.048	1.22288		6.048	0.37238		6.048	0.373137
6.0552	0.959897		6.0552	1.22293		6.0552	0.372451		6.0552	0.373232
6.0624	0.958675		6.0624	1.22294		6.0624	0.372517		6.0624	0.373358
6.0696	0.957525		6.0696	1.22294		6.0696	0.372583		6.0696	0.373501
6.0768	0.956464		6.0768	1.22295		6.0768	0.372624		6.0768	0.373632
6.084	0.955504		6.084	1.22298		6.084	0.372613		6.084	0.373739
6.0912	0.954652		6.0912	1.22305		6.0912	0.372547		6.0912	0.373816
6.0984	0.953889		6.0984	1.22315		6.0984	0.372422		6.0984	0.373852
6.1056	0.953203		6.1056	1.22325		6.1056	0.372243		6.1056	0.373864
6.1128	0.952578		6.1128	1.22333		6.1128	0.372046		6.1128	0.373852
6.12	0.951994		6.12	1.22337		6.12	0.371873		6.12	0.373834
6.1272	0.951445		6.1272	1.22336		6.1272	0.371742		6.1272	0.373805
6.1344	0.950944		6.1344	1.2233		6.1344	0.371683		6.1344	0.373787
6.1416	0.95048		6.1416	1.22319		6.1416	0.371736		6.1416	0.373787
6.1488	0.950062		6.1488	1.22303		6.1488	0.371885		6.1488	0.373799
6.156	0.949728		6.156	1.22288		6.156	0.372118		6.156	0.373828
6.1632	0.949496		6.1632	1.22275		6.1632	0.37241		6.1632	0.37387
6.1704	0.949407		6.1704	1.22265		6.1704	0.372732		6.1704	0.373918
6.1776	0.94946		6.1776	1.22259		6.1776	0.373042		6.1776	0.373948
6.1848	0.949663		6.1848	1.22257		6.1848	0.373316		6.1848	0.373966
6.192	0.949979		6.192	1.22259		6.192	0.373524		6.192	0.37396
6.1992	0.950402		6.1992	1.22266		6.1992	0.373661		6.1992	0.373918
6.2064	0.950873		6.2064	1.22274		6.2064	0.373721		6.2064	0.37384
6.2136	0.951391		6.2136	1.22284		6.2136	0.373727		6.2136	0.373733
6.2208	0.951916		6.2208	1.22292		6.2208	0.373679		6.2208	0.373614
6.228	0.952423		6.228	1.22297		6.228	0.373602		6.228	0.373495
6.2352	0.952917		6.2352	1.22302		6.2352	0.373483		6.2352	0.373399
6.2424	0.953406		6.2424	1.22305		6.2424	0.37337		6.2424	0.373316
6.2496	0.953925		6.2496	1.22309		6.2496	0.373262		6.2496	0.37325
6.2568	0.954503		6.2568	1.22312		6.2568	0.373185		6.2568	0.373191
6.264	0.955147		6.264	1.22317		6.264	0.373137		6.264	0.373131
6.2712	0.955892		6.2712	1.22321		6.2712	0.373107		6.2712	0.373048
6.2784	0.95672		6.2784	1.22326		6.2784	0.373089		6.2784	0.372958
6.2856	0.957644		6.2856	1.2233		6.2856	0.373065		6.2856	0.372845
6.2928	0.958639		6.2928	1.22331		6.2928	0.37303		6.2928	0.372732
6.3	0.959688		6.3	1.22329		6.3	0.372958		6.3	0.372624
6.3072	0.960738		6.3072	1.22323		6.3072	0.372857		6.3072	0.372541
6.3144	0.961769		6.3144	1.22314		6.3144	0.372702		6.3144	0.372487
6.3216	0.962746		6.3216	1.22303		6.3216	0.372517		6.3216	0.372457
6.3288	0.963646		6.3288	1.22291		6.3288	0.372308		6.3288	0.372446
6.336	0.964451		6.336	1.22281		6.336	0.372118		6.336	0.372422
6.3432	0.965142		6.3432	1.22275		6.3432	0.371969		6.3432	0.372386
6.3504	0.965726		6.3504	1.22271		6.3504	0.371885		6.3504	0.372338
6.3576	0.966215		6.3576	1.22268		6.3576	0.371885		6.3576	0.372279
6.3648	0.966626		6.3648	1.22265		6.3648	0.371945		6.3648	0.372213
6.372	0.966996		6.372	1.2226		6.372	0.372064		6.372	0.372154
6.3792	0.967324		6.3792	1.22252		6.3792	0.372207		6.3792	0.372106
6.3864	0.967622		6.3864	1.2224		6.3864	0.372338		6.3864	0.372088
6.3936	0.967896		6.3936	1.22222		6.3936	0.372428		6.3936	0.372094
6.4008	0.968152		6.4008	1.222		6.4008	0.372428		6.4008	0.372112
6.408	0.968373		6.408	1.22178		6.408	0.372332		6.408	0.372136
6.4152	0.968546		6.4152	1.22158		6.4152	0.372142		6.4152	0.372148
6.4224	0.968641		6.4224	1.22144		6.4224	0.371885		6.4224	0.372159
6.4296	0.968641		6.4296	1.22138		6.4296	0.371599		6.4296	0.372154
6.4368	0.968528		6.4368	1.22139		6.4368	0.371319		6.4368	0.372159
6.444	0.968295		6.444	1.22146		6.444	0.371087		6.444	0.372183
6.4512	0.96795		6.4512	1.22157		6.4512	0.370943		6.4512	0.372243
6.4584	0.967497		6.4584	1.22171		6.4584	0.370914		6.4584	0.372344
6.4656	0.966966		6.4656	1.22183		6.4656	0.371021		6.4656	0.372481
6.4728	0.966406		6.4728	1.22192		6.4728	0.371242		6.4728	0.372648
6.48	0.965851		6.48	1.22197		6.48	0.371563		6.48	0.372827
6.4872	0.965351		6.4872	1.22197		6.4872	0.371945		6.4872	0.373
6.4944	0.96494		6.4944	1.22196		6.4944	0.37235		6.4944	0.373149
6.5016	0.964642		6.5016	1.22196		6.5016	0.372767		6.5016	0.373244
6.5088	0.964481		6.5088	1.222		6.5088	0.373167		6.5088	0.37328
6.516	0.964475		6.516	1.22208		6.516	0.373513		6.516	0.373262
6.5232	0.964618		6.5232	1.2222		6.5232	0.373775		6.5232	0.373197
6.5304	0.964928		6.5304	1.22232		6.5304	0.373942		6.5304	0.373095
6.5376	0.965404		6.5376	1.22246		6.5376	0.374001		6.5376	0.372988
6.5448	0.966096		6.5448	1.22258		6.5448	0.37396		6.5448	0.372899
6.552	0.967038		6.552	1.22267		6.552	0.373834		6.552	0.372821
6.5592	0.968283		6.5592	1.22272		6.5592	0.373614		6.5592	0.372785
6.5664	0.969863		6.5664	1.2227		6.5664	0.373316		6.5664	0.372797
6.5736	0.971782		6.5736	1.22262		6.5736	0.37297		6.5736	0.372845
6.5808	0.974053		6.5808	1.22247		6.5808	0.372607		6.5808	0.37291
6.588	0.976682		6.588	1.2223		6.588	0.372267		6.588	0.372988
6.5952	0.979662		6.5952	1.22212		6.5952	0.371999		6.5952	0.373048
6.6024	0.982982		6.6024	1.22192		6.6024	0.371814		6.6024	0.373083
6.6096	0.986654		6.6096	1.22173		6.6096	0.371748		6.6096	0.373071
6.6168	0.990683		6.6168	1.22154		6.6168	0.371814		6.6168	0.37303
6.624	0.995123		6.624	1.22138		6.624	0.371993		6.624	0.372934
6.6312	1.00002		6.6312	1.22127		6.6312	0.372261		6.6312	0.372809
6.6384	1.00542		6.6384	1.22121		6.6384	0.372601		6.6384	0.372678
6.6456	1.01136		6.6456	1.2212		6.6456	0.372952		6.6456	0.372553
6.6528	1.01784		6.6528	1.22122		6.6528	0.373274		6.6528	0.372434
6.66	1.02484		6.66	1.22128		6.66	0.373513		6.66	0.372356
6.6672	1.03235		6.6672	1.22137		6.6672	0.373632		6.6672	0.372314
6.6744	1.04032		6.6744	1.2215		6.6744	0.373638		6.6744	0.372338
6.6816	1.04871		6.6816	1.22166		6.6816	0.37353		6.6816	0.37241
6.6888	1.05751		6.6888	1.22184		6.6888	0.37334		6.6888	0.372517
6.696	1.06669		6.696	1.22203		6.696	0.373089		6.696	0.372636
6.7032	1.07624		6.7032	1.22224		6.7032	0.372821		6.7032	0.372756
6.7104	1.08619		6.7104	1.22247		6.7104	0.372565		6.7104	0.372857
6.7176	1.09654		6.7176	1.2227		6.7176	0.372362		6.7176	0.372928
6.7248	1.10726		6.7248	1.22294		6.7248	0.372225		6.7248	0.372976
6.732	1.11834		6.732	1.22318		6.732	0.372165		6.732	0.373
6.7392	1.12973		6.7392	1.22341		6.7392	0.372171		6.7392	0.372994
6.7464	1.14139		6.7464	1.22363		6.7464	0.372237		6.7464	0.37297
6.7536	1.15324		6.7536	1.22386		6.7536	0.372338		6.7536	0.372946
6.7608	1.16521		6.7608	1.22409		6.7608	0.37244		6.7608	0.372928
6.768	1.17723		6.768	1.22433		6.768	0.372529		6.768	0.372905
6.7752	1.18924		6.7752	1.22457		6.7752	0.372583		6.7752	0.372875
6.7824	1.20116		6.7824	1.22483		6.7824	0.372577		6.7824	0.372821
6.7896	1.21294		6.7896	1.22509		6.7896	0.372493		6.7896	0.372756
6.7968	1.22454		6.7968	1.22536		6.7968	0.372326		6.7968	0.372678
6.804	1.23589		6.804	1.22561		6.804	0.372082		6.804	0.372595
6.8112	1.24695		6.8112	1.22583		6.8112	0.37179		6.8112	0.372517
6.8184	1.25769		6.8184	1.22599		6.8184	0.371462		6.8184	0.372457
6.8256	1.26808		6.8256	1.22607		6.8256	0.371128		6.8256	0.372422
6.8328	1.27805		6.8328	1.22604		6.8328	0.370824		6.8328	0.372404
6.84	1.28757		6.84	1.22591		6.84	0.370544		6.84	0.372392
6.8472	1.29661		6.8472	1.22569		6.8472	0.37033		6.8472	0.372374
6.8544	1.30512		6.8544	1.22538		6.8544	0.370175		6.8544	0.372326
6.8616	1.31307		6.8616	1.22504		6.8616	0.370085		6.8616	0.372255
6.8688	1.3204		6.8688	1.22468		6.8688	0.370055		6.8688	0.372154
6.876	1.32706		6.876	1.22434		6.876	0.370049		6.876	0.37204
6.8832	1.33301		6.8832	1.22403		6.8832	0.370067		6.8832	0.371915
6.8904	1.33818		6.8904	1.2238		6.8904	0.370109		6.8904	0.37182
6.8976	1.34254		6.8976	1.22363		6.8976	0.370175		6.8976	0.371766
6.9048	1.34603		6.9048	1.22352		6.9048	0.370264		6.9048	0.371766
6.912	1.34864		6.912	1.22344		6.912	0.370377		6.912	0.37182
6.9192	1.35035		6.9192	1.22341		6.9192	0.370514		6.9192	0.371915
6.9264	1.35117		6.9264	1.22343		6.9264	0.370669		6.9264	0.372046
6.9336	1.3511		6.9336	1.22348		6.9336	0.370836		6.9336	0.372219
6.9408	1.35015		6.9408	1.22353		6.9408	0.371003		6.9408	0.372422
6.948	1.34836		6.948	1.22358		6.948	0.371158		6.948	0.372654
6.9552	1.34575		6.9552	1.22362		6.9552	0.371295		6.9552	0.37291
6.9624	1.34232		6.9624	1.22364		6.9624	0.371426		6.9624	0.373161
6.9696	1.33811		6.9696	1.22365		6.9696	0.371534		6.9696	0.373393
6.9768	1.33311		6.9768	1.22364		6.9768	0.371641		6.9768	0.37359
6.984	1.32737		6.984	1.22361		6.984	0.371742		6.984	0.373721
6.9912	1.32089		6.9912	1.22356		6.9912	0.371856		6.9912	0.373763
6.9984	1.31373		6.9984	1.22351		6.9984	0.371975		6.9984	0.373697
7.0056	1.30592		7.0056	1.22346		7.0056	0.3721		7.0056	0.373536
7.0128	1.29749		7.0128	1.22343		7.0128	0.372213		7.0128	0.373292
7.02	1.28846		7.02	1.22342		7.02	0.372314		7.02	0.373024
7.0272	1.27888		7.0272	1.22341		7.0272	0.372398		7.0272	0.372756
7.0344	1.2688		7.0344	1.2234		7.0344	0.372475		7.0344	0.372511
7.0416	1.25822		7.0416	1.2234		7.0416	0.372541		7.0416	0.372308
7.0488	1.24721		7.0488	1.22339		7.0488	0.372613		7.0488	0.372159
7.056	1.2358		7.056	1.2234		7.056	0.372678		7.056	0.372088
7.0632	1.22404		7.0632	1.22341		7.0632	0.372738		7.0632	0.372094
7.0704	1.21204		7.0704	1.22343		7.0704	0.372797		7.0704	0.372148
7.0776	1.19986		7.0776	1.22348		7.0776	0.372869		7.0776	0.372231
7.0848	1.18764		7.0848	1.22357		7.0848	0.372934		7.0848	0.372332
7.092	1.17546		7.092	1.22371		7.092	0.372976		7.092	0.372434
7.0992	1.16345		7.0992	1.22387		7.0992	0.372982		7.0992	0.372517
7.1064	1.15169		7.1064	1.22403		7.1064	0.37294		7.1064	0.372577
7.1136	1.14031		7.1136	1.22418		7.1136	0.372857		7.1136	0.372601
7.1208	1.12941		7.1208	1.22427		7.1208	0.372738		7.1208	0.372565
7.128	1.11904		7.128	1.22431		7.128	0.372583		7.128	0.372481
7.1352	1.10928		7.1352	1.22428		7.1352	0.372416		7.1352	0.372362
7.1424	1.10019		7.1424	1.22417		7.1424	0.372243		7.1424	0.372219
7.1496	1.09186		7.1496	1.22399		7.1496	0.372076		7.1496	0.372064
7.1568	1.08436		7.1568	1.22376		7.1568	0.371963		7.1568	0.371933
7.164	1.0778		7.164	1.2235		7.164	0.371909		7.164	0.371826
7.1712	1.07226		7.1712	1.22321		7.1712	0.371921		7.1712	0.37176
7.1784	1.06788		7.1784	1.22293		7.1784	0.372011		7.1784	0.371736
7.1856	1.06476		7.1856	1.22268		7.1856	0.372154		7.1856	0.371754
7.1928	1.06305		7.1928	1.22246		7.1928	0.372338		7.1928	0.371814
7.2	1.06287		7.2	1.22229		7.2	0.372535		7.2	0.371915
7.2072	1.06437		7.2072	1.22216		7.2072	0.372714		7.2072	0.372034
7.2144	1.0677		7.2144	1.2221		7.2144	0.372851		7.2144	0.372177
7.2216	1.07304		7.2216	1.22209		7.2216	0.372916		7.2216	0.372332
7.2288	1.0806		7.2288	1.22216		7.2288	0.372899		7.2288	0.372481
7.236	1.09063		7.236	1.2223		7.236	0.372809		7.236	0.372613
7.2432	1.10339		7.2432	1.22249		7.2432	0.372672		7.2432	0.372738
7.2504	1.11919		7.2504	1.2227		7.2504	0.372481		7.2504	0.372833
7.2576	1.13834		7.2576	1.22292		7.2576	0.372267		7.2576	0.372893
7.2648	1.16116		7.2648	1.22312		7.2648	0.37207		7.2648	0.372922
7.272	1.18804		7.272	1.2233		7.272	0.371891		7.272	0.372916
7.2792	1.21932		7.2792	1.22341		7.2792	0.371742		7.2792	0.372899
7.2864	1.25543		7.2864	1.22344		7.2864	0.371641		7.2864	0.372881
7.2936	1.29684		7.2936	1.22339		7.2936	0.371575		7.2936	0.372857
7.3008	1.34408		7.3008	1.22328		7.3008	0.371534		7.3008	0.372845
7.308	1.39776		7.308	1.22314		7.308	0.37151		7.308	0.372851
7.3152	1.45858		7.3152	1.22297		7.3152	0.371492		7.3152	0.372863
7.3224	1.52731		7.3224	1.22283		7.3224	0.371462		7.3224	0.372887
7.3296	1.60481		7.3296	1.22271		7.3296	0.371408		7.3296	0.372893
7.3368	1.69203		7.3368	1.22264		7.3368	0.371319		7.3368	0.372869
7.344	1.78999		7.344	1.22262		7.344	0.371212		7.344	0.372803
7.3512	1.8998		7.3512	1.22264		7.3512	0.371069		7.3512	0.372702
7.3584	2.02265		7.3584	1.22269		7.3584	0.370902		7.3584	0.372565
7.3656	2.15984		7.3656	1.22273		7.3656	0.370717		7.3656	0.372416
7.3728	2.31276		7.3728	1.22277		7.3728	0.37052		7.3728	0.372267
7.38	2.48293		7.38	1.22277		7.38	0.370341		7.38	0.372148
7.3872	2.67199		7.3872	1.22277		7.3872	0.370192		7.3872	0.372082
7.3944	2.88171		7.3944	1.22275		7.3944	0.370079		7.3944	0.372064
7.4016	3.11397		7.4016	1.22277		7.4016	0.370026		7.4016	0.372088
7.4088	3.37077		7.4088	1.22281		7.4088	0.370032		7.4088	0.372148
7.416	3.65428		7.416	1.22291		7.416	0.370103		7.416	0.372225
7.4232	3.96679		7.4232	1.22307		7.4232	0.370228		7.4232	0.372297
7.4304	4.3107		7.4304	1.22331		7.4304	0.370401		7.4304	0.372356
7.4376	4.68849		7.4376	1.22359		7.4376	0.370616		7.4376	0.372404
7.4448	5.10268		7.4448	1.22392		7.4448	0.370854		7.4448	0.37244
7.452	5.55582		7.452	1.22426		7.452	0.37111		7.452	0.372499
7.4592	6.05051		7.4592	1.22458		7.4592	0.371367		7.4592	0.372583
7.4664	6.58932		7.4664	1.22487		7.4664	0.371617		7.4664	0.372684
7.4736	7.1748		7.4736	1.22513		7.4736	0.371856		7.4736	0.372803
7.4808	7.80945		7.4808	1.22533		7.4808	0.37207		7.4808	0.372928
7.488	8.4957		7.488	1.2255		7.488	0.372261		7.488	0.373054
7.4952	9.23594		7.4952	1.22559		7.4952	0.37241		7.4952	0.373185
7.5024	10.0325		7.5024	1.22564		7.5024	0.372511		7.5024	0.373298
7.5096	10.8877		7.5096	1.22564		7.5096	0.372565		7.5096	0.373393
7.5168	11.8035		7.5168	1.22558		7.5168	0.372571		7.5168	0.373489
7.524	12.782		7.524	1.22548		7.524	0.372553		7.524	0.373578
7.5312	13.8248		7.5312	1.22533		7.5312	0.372517		7.5312	0.373656
7.5384	14.9336		7.5384	1.22514		7.5384	0.372487		7.5384	0.373727
7.5456	16.1096		7.5456	1.22492		7.5456	0.372481		7.5456	0.373751
7.5528	17.3536		7.5528	1.22466		7.5528	0.372493		7.5528	0.373727
7.56	18.6662		7.56	1.22439		7.56	0.372535		7.56	0.373644
7.5672	20.0474		7.5672	1.22413		7.5672	0.372601		7.5672	0.373507
7.5744	21.4969		7.5744	1.22389		7.5744	0.372678		7.5744	0.373334
7.5816	23.0139		7.5816	1.2237		7.5816	0.372732		7.5816	0.373143
7.5888	24.5969		7.5888	1.22355		7.5888	0.372744		7.5888	0.372964
7.596	26.2442		7.596	1.22345		7.596	0.372696		7.596	0.372827
7.6032	27.953		7.6032	1.22341		7.6032	0.372583		7.6032	0.372732
7.6104	29.7204		7.6104	1.22341		7.6104	0.372386		7.6104	0.372684
7.6176	31.5426		7.6176	1.22348		7.6176	0.372124		7.6176	0.372654
7.6248	33.4153		7.6248	1.22355		7.6248	0.371796		7.6248	0.372613
7.632	35.3339		7.632	1.22363		7.632	0.371444		7.632	0.372541
7.6392	37.2931		7.6392	1.22369		7.6392	0.371098		7.6392	0.372434
7.6464	39.2875		7.6464	1.22372		7.6464	0.370806		7.6464	0.372285
7.6536	41.3113		7.6536	1.22371		7.6536	0.370598		7.6536	0.372112
7.6608	43.3586		7.6608	1.22367		7.6608	0.370503		7.6608	0.371963
7.668	45.4229		7.668	1.22358		7.668	0.370526		7.668	0.371873
7.6752	47.4973		7.6752	1.22347		7.6752	0.370675		7.6752	0.371879
7.6824	49.5746		7.6824	1.22336		7.6824	0.370914		7.6824	0.371987
7.6896	51.6472		7.6896	1.22324		7.6896	0.371218		7.6896	0.372183
7.6968	53.7069		7.6968	1.22315		7.6968	0.371546		7.6968	0.37244
7.704	55.7453		7.704	1.22311		7.704	0.371862		7.704	0.372714
7.7112	57.7533		7.7112	1.22311		7.7112	0.372154		7.7112	0.372976
7.7184	59.7219		7.7184	1.22316		7.7184	0.372392		7.7184	0.373179
7.7256	61.642		7.7256	1.22325		7.7256	0.372577		7.7256	0.37331
7.7328	63.5049		7.7328	1.22336		7.7328	0.372708		7.7328	0.373364
7.74	65.302		7.74	1.22348		7.74	0.372815		7.74	0.373364
7.7472	67.0251		7.7472	1.22358		7.7472	0.372893		7.7472	0.373334
7.7544	68.6667		7.7544	1.22367		7.7544	0.372952		7.7544	0.37331
7.7616	70.2198		7.7616	1.22372		7.7616	0.372976		7.7616	0.373292
7.7688	71.6776		7.7688	1.22374		7.7688	0.372976		7.7688	0.373298
7.776	73.0339		7.776	1.22369		7.776	0.372946		7.776	0.37331
7.7832	74.2828		7.7832	1.22363		7.7832	0.372887		7.7832	0.37334
7.7904	75.4192		7.7904	1.22357		7.7904	0.372809		7.7904	0.37337
7.7976	76.4383		7.7976	1.22354		7.7976	0.372726		7.7976	0.373393
7.8048	77.3357		7.8048	1.22355		7.8048	0.372642		7.8048	0.373417
7.812	78.1077		7.812	1.22361		7.812	0.372577		7.812	0.373435
7.8192	78.751		7.8192	1.22371		7.8192	0.372529		7.8192	0.373447
7.8264	79.2634		7.8264	1.22381		7.8264	0.372523		7.8264	0.373459
7.8336	79.6433		7.8336	1.2239		7.8336	0.372529		7.8336	0.373447
7.8408	79.8897		7.8408	1.22395		7.8408	0.372529		7.8408	0.373411
7.848	80.0022		7.848	1.22396		7.848	0.372523		7.848	0.373334
7.8552	79.9806		7.8552	1.22389		7.8552	0.372481		7.8552	0.373203
7.8624	79.8254		7.8624	1.2238		7.8624	0.372416		7.8624	0.373024
7.8696	79.5377		7.8696	1.22371		7.8696	0.372308		7.8696	0.372809
7.8768	79.1195		7.8768	1.22363		7.8768	0.372177		7.8768	0.372589
7.884	78.5731		7.884	1.22362		7.884	0.372016		7.884	0.372404
7.8912	77.9019		7.8912	1.22367		7.8912	0.371867		7.8912	0.372279
7.8984	77.1098		7.8984	1.22377		7.8984	0.371736		7.8984	0.372231
7.9056	76.2016		7.9056	1.22391		7.9056	0.371653		7.9056	0.372273
7.9128	75.183		7.9128	1.22405		7.9128	0.371617		7.9128	0.372404
7.92	74.0606		7.92	1.22416		7.92	0.371635		7.92	0.372589
7.9272	72.8413		7.9272	1.22422		7.9272	0.3717		7.9272	0.372803
7.9344	71.532		7.9344	1.22423		7.9344	0.37182		7.9344	0.373006
7.9416	70.14		7.9416	1.22418		7.9416	0.371969		7.9416	0.373185
7.9488	68.6723		7.9488	1.2241		7.9488	0.372124		7.9488	0.373328
7.956	67.1365		7.956	1.22401		7.956	0.372273		7.956	0.373441
7.9632	65.5401		7.9632	1.22394		7.9632	0.372398		7.9632	0.37353
7.9704	63.8904		7.9704	1.22392		7.9704	0.372487		7.9704	0.373608
7.9776	62.1945		7.9776	1.22397		7.9776	0.372529		7.9776	0.373679
7.9848	60.4592		7.9848	1.22408		7.9848	0.372517		7.9848	0.373763
7.992	58.6913		7.992	1.22427		7.992	0.372451		7.992	0.373858
7.9992	56.8973		7.9992	1.22453		7.9992	0.372344		7.9992	0.37396
8.0064	55.0834		8.0064	1.22482		8.0064	0.372213		8.0064	0.374055
8.0136	53.2558		8.0136	1.22514		8.0136	0.372088		8.0136	0.374144
8.0208	51.4202		8.0208	1.22547		8.0208	0.371999		8.0208	0.37421
8.028	49.5824		8.028	1.22578		8.028	0.371945		8.028	0.374246
8.0352	47.7482		8.0352	1.22609		8.0352	0.371951		8.0352	0.374258
8.0424	45.9233		8.0424	1.22637		8.0424	0.372011		8.0424	0.374228
8.0496	44.1136		8.0496	1.22663		8.0496	0.372124		8.0496	0.374144
8.0568	42.3245		8.0568	1.22685		8.0568	0.372279		8.0568	0.374025
8.064	40.5613		8.064	1.22704		8.064	0.372457		8.064	0.37387
8.0712	38.8289		8.0712	1.22719		8.0712	0.372624		8.0712	0.373703
8.0784	37.1315		8.0784	1.22731		8.0784	0.372767		8.0784	0.373542
8.0856	35.4728		8.0856	1.22738		8.0856	0.372869		8.0856	0.373417
8.0928	33.8558		8.0928	1.2274		8.0928	0.372922		8.0928	0.373346
8.1	32.2829		8.1	1.22737		8.1	0.37294		8.1	0.373352
8.1072	30.7561		8.1072	1.2273		8.1072	0.372934		8.1072	0.373417
8.1144	29.2771		8.1144	1.22722		8.1144	0.37291		8.1144	0.373554
8.1216	27.8469		8.1216	1.22714		8.1216	0.372887		8.1216	0.373727
8.1288	26.4667		8.1288	1.22709		8.1288	0.372893		8.1288	0.373918
8.136	25.1373		8.136	1.22709		8.136	0.372922		8.136	0.374091
8.1432	23.8592		8.1432	1.22714		8.1432	0.373		8.1432	0.374228
8.1504	22.6329		8.1504	1.22729		8.1504	0.373113		8.1504	0.374311
8.1576	21.4585		8.1576	1.22752		8.1576	0.373238		8.1576	0.374353
8.1648	20.3359		8.1648	1.2278		8.1648	0.373375		8.1648	0.374371
8.172	19.2646		8.172	1.22812		8.172	0.373536		8.172	0.374401
8.1792	18.2441		8.1792	1.22846		8.1792	0.373715		8.1792	0.374454
8.1864	17.2734		8.1864	1.22877		8.1864	0.373918		8.1864	0.374561
8.1936	16.3515		8.1936	1.22904		8.1936	0.374138		8.1936	0.374734
8.2008	15.4771		8.2008	1.22925		8.2008	0.374377		8.2008	0.374967
8.208	14.6488		8.208	1.22941		8.208	0.374621		8.208	0.375265
8.2152	13.8652		8.2152	1.22955		8.2152	0.374866		8.2152	0.375599
8.2224	13.1247		8.2224	1.22967		8.2224	0.375086		8.2224	0.37592
8.2296	12.4258		8.2296	1.22983		8.2296	0.375259		8.2296	0.376207
8.2368	11.7669		8.2368	1.23002		8.2368	0.375342		8.2368	0.376421
8.244	11.1465		8.244	1.23027		8.244	0.375318		8.244	0.376552
8.2512	10.5628		8.2512	1.23057		8.2512	0.375193		8.2512	0.3766
8.2584	10.0143		8.2584	1.23091		8.2584	0.375003		8.2584	0.376576
8.2656	9.49911		8.2656	1.23124		8.2656	0.374764		8.2656	0.376511
8.2728	9.01574		8.2728	1.2315		8.2728	0.374526		8.2728	0.376415
8.28	8.56245		8.28	1.23169		8.28	0.374329		8.28	0.37632
8.2872	8.13754		8.2872	1.23178		8.2872	0.374216		8.2872	0.376254
8.2944	7.73934		8.2944	1.23183		8.2944	0.37421		8.2944	0.376236
8.3016	7.36623		8.3016	1.23185		8.3016	0.374317		8.3016	0.376272
8.3088	7.01666		8.3088	1.23189		8.3088	0.374514		8.3088	0.37635
8.316	6.68919		8.316	1.232		8.316	0.37477		8.316	0.376451
8.3232	6.38241		8.3232	1.23222		8.3232	0.37505		8.3232	0.376588
8.3304	6.09506		8.3304	1.23259		8.3304	0.375318		8.3304	0.376761
8.3376	5.82592		8.3376	1.2331		8.3376	0.375551		8.3376	0.376999
8.3448	5.57388		8.3448	1.23375		8.3448	0.375724		8.3448	0.377297
8.352	5.33785		8.352	1.23447		8.352	0.375831		8.352	0.377673
8.3592	5.11673		8.3592	1.23524		8.3592	0.375885		8.3592	0.37812
8.3664	4.90951		8.3664	1.23602		8.3664	0.37592		8.3664	0.378609
8.3736	4.71515		8.3736	1.23678		8.3736	0.375956		8.3736	0.379145
8.3808	4.53268		8.3808	1.23752		8.3808	0.376028		8.3808	0.379682
8.388	4.36117		8.388	1.23824		8.388	0.376153		8.388	0.3802
8.3952	4.19977		8.3952	1.23893		8.3952	0.376362		8.3952	0.380653
8.4024	4.04771		8.4024	1.23963		8.4024	0.37666		8.4024	0.381029
8.4096	3.90429		8.4096	1.24036		8.4096	0.377035		8.4096	0.381315
8.4168	3.76895		8.4168	1.24109		8.4168	0.377458		8.4168	0.381523
8.424	3.64118		8.424	1.24186		8.424	0.377887		8.424	0.381649
8.4312	3.52049		8.4312	1.24266		8.4312	0.378275		8.4312	0.381714
8.4384	3.40644		8.4384	1.24347		8.4384	0.378597		8.4384	0.381744
8.4456	3.29856		8.4456	1.24428		8.4456	0.378829		8.4456	0.381756
8.4528	3.19641		8.4528	1.24509		8.4528	0.378937		8.4528	0.381786
8.46	3.09952		8.46	1.24588		8.46	0.378937		8.46	0.381839
8.4672	3.0075		8.4672	1.24666		8.4672	0.378841		8.4672	0.381935
8.4744	2.91995		8.4744	1.24745		8.4744	0.378698		8.4744	0.38209
8.4816	2.83651		8.4816	1.24824		8.4816	0.378561		8.4816	0.382328
8.4888	2.75687		8.4888	1.24905		8.4888	0.378466		8.4888	0.382638
8.496	2.68077		8.496	1.24984		8.496	0.378472		8.496	0.383014
8.5032	2.60803		8.5032	1.25063		8.5032	0.378603		8.5032	0.383437
8.5104	2.53845		8.5104	1.25139		8.5104	0.378877		8.5104	0.38389
8.5176	2.47189		8.5176	1.25212		8.5176	0.3793		8.5176	0.384361
8.5248	2.4082		8.5248	1.25281		8.5248	0.379848		8.5248	0.384837
8.532	2.34718		8.532	1.25344		8.532	0.380504		8.532	0.385302
8.5392	2.28868		8.5392	1.25404		8.5392	0.381219		8.5392	0.385737
8.5464	2.23253		8.5464	1.2546		8.5464	0.381982		8.5464	0.386131
8.5536	2.17856		8.5536	1.25518		8.5536	0.382775		8.5536	0.386477
8.5608	2.12664		8.5608	1.25577		8.5608	0.383568		8.5608	0.386792
8.568	2.07661		8.568	1.25639		8.568	0.384349		8.568	0.387114
8.5752	2.02834		8.5752	1.25704		8.5752	0.3851		8.5752	0.38743
8.5824	1.98171		8.5824	1.25773		8.5824	0.385833		8.5824	0.387788
8.5896	1.93663		8.5896	1.25844		8.5896	0.386524		8.5896	0.388181
8.5968	1.89303		8.5968	1.25915		8.5968	0.387174		8.5968	0.388646
8.604	1.8508		8.604	1.25986		8.604	0.387782		8.604	0.389183
8.6112	1.80988		8.6112	1.26058		8.6112	0.388336		8.6112	0.38979
8.6184	1.77023		8.6184	1.2613		8.6184	0.388861		8.6184	0.390452
8.6256	1.73183		8.6256	1.26205		8.6256	0.389367		8.6256	0.391161
8.6328	1.69466		8.6328	1.26286		8.6328	0.389892		8.6328	0.391912
8.64	1.65871		8.64	1.26375		8.64	0.390446		8.64	0.392705
8.6472	1.62398		8.6472	1.26472		8.6472	0.391036		8.6472	0.39354
8.6544	1.59045		8.6544	1.26579		8.6544	0.39168		8.6544	0.394416
8.6616	1.5581		8.6616	1.26694		8.6616	0.392377		8.6616	0.395346
8.6688	1.52689		8.6688	1.26815		8.6688	0.393116		8.6688	0.396341
8.676	1.49679		8.676	1.26944		8.676	0.393879		8.676	0.397396
8.6832	1.46773		8.6832	1.27076		8.6832	0.39466		8.6832	0.398529
8.6904	1.43965		8.6904	1.27213		8.6904	0.395435		8.6904	0.399703
8.6976	1.41252		8.6976	1.27352		8.6976	0.396234		8.6976	0.400943
8.7048	1.3863		8.7048	1.27495		8.7048	0.397056		8.7048	0.402242
8.712	1.36097		8.712	1.27642		8.712	0.397921		8.712	0.403619
8.7192	1.3365		8.7192	1.27791		8.7192	0.398856		8.7192	0.405079
8.7264	1.31286		8.7264	1.27944		8.7264	0.399864		8.7264	0.406647
8.7336	1.29002		8.7336	1.28103		8.7336	0.400948		8.7336	0.408304
8.7408	1.26796		8.7408	1.28268		8.7408	0.402105		8.7408	0.410044
8.748	1.24666		8.748	1.28442		8.748	0.403315		8.748	0.411868
8.7552	1.22606		8.7552	1.28624		8.7552	0.404543		8.7552	0.413734
8.7624	1.20613		8.7624	1.28815		8.7624	0.405776		8.7624	0.415611
8.7696	1.18684		8.7696	1.29017		8.7696	0.406986		8.7696	0.417459
8.7768	1.16819		8.7768	1.29229		8.7768	0.408161		8.7768	0.419247
8.784	1.15016		8.784	1.29449		8.784	0.409305		8.784	0.420976
8.7912	1.13275		8.7912	1.29678		8.7912	0.410426		8.7912	0.422633
8.7984	1.11597		8.7984	1.29913		8.7984	0.41154		8.7984	0.424254
8.8056	1.09981		8.8056	1.30153		8.8056	0.412691		8.8056	0.425869
8.8128	1.08427		8.8128	1.30399		8.8128	0.413901		8.8128	0.427526
8.82	1.06935		8.82	1.30652		8.82	0.415194		8.82	0.429261
8.8272	1.05501		8.8272	1.30913		8.8272	0.416595		8.8272	0.431114
8.8344	1.04124		8.8344	1.31183		8.8344	0.418109		8.8344	0.433117
8.8416	1.02798		8.8416	1.31463		8.8416	0.419742		8.8416	0.435269
8.8488	1.01519		8.8488	1.31753		8.8488	0.421488		8.8488	0.437564
8.856	1.00282		8.856	1.32053		8.856	0.423336		8.856	0.439995
8.8632	0.99085		8.8632	1.3236		8.8632	0.425267		8.8632	0.442535
8.8704	0.979245		8.8704	1.32675		8.8704	0.427276		8.8704	0.445163
8.8776	0.967962		8.8776	1.32994		8.8776	0.429344		8.8776	0.447857
8.8848	0.957006		8.8848	1.33316		8.8848	0.431496		8.8848	0.450617
8.892	0.946355		8.892	1.33642		8.892	0.433707		8.892	0.45343
8.8992	0.936031		8.8992	1.33972		8.8992	0.436008		8.8992	0.456333
8.9064	0.926036		8.9064	1.34303		8.9064	0.43841		8.9064	0.459325
8.9136	0.91638		8.9136	1.34637		8.9136	0.440931		8.9136	0.462425
8.9208	0.907057		8.9208	1.34972		8.9208	0.443578		8.9208	0.465614
8.928	0.898069		8.928	1.35308		8.928	0.446349		8.928	0.468886
8.9352	0.889397		8.9352	1.35643		8.9352	0.449234		8.9352	0.47223
8.9424	0.88101		8.9424	1.35978		8.9424	0.452232		8.9424	0.475621
8.9496	0.87288		8.9496	1.36313		8.9496	0.455332		8.9496	0.479037
8.9568	0.864965		8.9568	1.36653		8.9568	0.458527		8.9568	0.482458
8.964	0.85724		8.964	1.36998		8.964	0.461823		8.964	0.485861
8.9712	0.84967		8.9712	1.37351		8.9712	0.465238		8.9712	0.489271
8.9784	0.842261		8.9784	1.37715		8.9784	0.468803		8.9784	0.492704
8.9856	0.835019		8.9856	1.38091		8.9856	0.47254		8.9856	0.496191
8.9928	0.827938		8.9928	1.3848		8.9928	0.476509		8.9928	0.499767
9	0.821042		9	1.38884		9	0.480747		9	0.503451
9.0072	0.814331		9.0072	1.39304		9.0072	0.485313		9.0072	0.507271
9.0144	0.807822		9.0144	1.39739		9.0144	0.490242		9.0144	0.511265
9.0216	0.801504		9.0216	1.40189		9.0216	0.495577		9.0216	0.515461
9.0288	0.795376		9.0288	1.40657		9.0288	0.501352		9.0288	0.519854
9.036	0.789404		9.036	1.4114		9.036	0.507605		9.036	0.524455
9.0432	0.783563		9.0432	1.41641		9.0432	0.514376		9.0432	0.529247
9.0504	0.777829		9.0504	1.42159		9.0504	0.521702		9.0504	0.534242
9.0576	0.77219		9.0576	1.42694		9.0576	0.529617		9.0576	0.539446
9.0648	0.766635		9.0648	1.43247		9.0648	0.53817		9.0648	0.54487
9.072	0.761163		9.072	1.43819		9.072	0.547391		9.072	0.550538
9.0792	0.755769		9.0792	1.44407		9.0792	0.557321		9.0792	0.556499
9.0864	0.750458		9.0864	1.45013		9.0864	0.568014		9.0864	0.562805
9.0936	0.745237		9.0936	1.45636		9.0936	0.579512		9.0936	0.569528
9.1008	0.740099		9.1008	1.46276		9.1008	0.591862		9.1008	0.576735
9.108	0.735056		9.108	1.46935		9.108	0.605094		9.108	0.584465
9.1152	0.730091		9.1152	1.47616		9.1152	0.619292		9.1152	0.592762
9.1224	0.725204		9.1224	1.48323		9.1224	0.634515		9.1224	0.601643
9.1296	0.72037		9.1296	1.49058		9.1296	0.650853		9.1296	0.611115
9.1368	0.715584		9.1368	1.49829		9.1368	0.668395		9.1368	0.621188
9.144	0.710833		9.144	1.50639		9.144	0.687212		9.144	0.631863
9.1512	0.706124		9.1512	1.51497		9.1512	0.707412		9.1512	0.643158
9.1584	0.701469		9.1584	1.52408		9.1584	0.729048		9.1584	0.655115
9.1656	0.696874		9.1656	1.53374		9.1656	0.75224		9.1656	0.667793
9.1728	0.692362		9.1728	1.54398		9.1728	0.77706		9.1728	0.681263
9.18	0.687939		9.18	1.5548		9.18	0.80362		9.18	0.695592
9.1872	0.683612		9.1872	1.56625		9.1872	0.832021		9.1872	0.710863
9.1944	0.679374		9.1944	1.57837		9.1944	0.862402		9.1944	0.727135
9.2016	0.675207		9.2016	1.59116		9.2016	0.894892		9.2016	0.744462
9.2088	0.671089		9.2088	1.60469		9.2088	0.929648		9.2088	0.76291
9.216	0.666976		9.216	1.61904		9.216	0.966811		9.216	0.782532
9.2232	0.662845		9.2232	1.63428		9.2232	1.00651		9.2232	0.803387
9.2304	0.658691		9.2304	1.65055		9.2304	1.04889		9.2304	0.825554
9.2376	0.654531		9.2376	1.66796		9.2376	1.09408		9.2376	0.84911
9.2448	0.650388		9.2448	1.68659		9.2448	1.1422		9.2448	0.874162
9.252	0.646299		9.252	1.70652		9.252	1.19339		9.252	0.900781
9.2592	0.642306		9.2592	1.72784		9.2592	1.24778		9.2592	0.929081
9.2664	0.638443		9.2664	1.75061		9.2664	1.30555		9.2664	0.959164
9.2736	0.634742		9.2736	1.77491		9.2736	1.3669		9.2736	0.991112
9.2808	0.631189		9.2808	1.80081		9.2808	1.43206		9.2808	1.02504
9.288	0.627792		9.288	1.82836		9.288	1.50126		9.288	1.06103
9.2952	0.624496		9.2952	1.85766		9.2952	1.5748		9.2952	1.09921
9.3024	0.621271		9.3024	1.88879		9.3024	1.65298		9.3024	1.13966
9.3096	0.618076		9.3096	1.92191		9.3096	1.73615		9.3096	1.18251
9.3168	0.614888		9.3168	1.95715		9.3168	1.82465		9.3168	1.22788
9.324	0.611681		9.324	1.99465		9.324	1.91884		9.324	1.27593
9.3312	0.608444		9.3312	2.03457		9.3312	2.01911		9.3312	1.32679
9.3384	0.605178		9.3384	2.0771		9.3384	2.12588		9.3384	1.38062
9.3456	0.601912		9.3456	2.12241		9.3456	2.2396		9.3456	1.4376
9.3528	0.598687		9.3528	2.17075		9.3528	2.36082		9.3528	1.49789
9.36	0.595522		9.36	2.22231		9.36	2.49018		9.36	1.56165
9.3672	0.59244		9.3672	2.27734		9.3672	2.62843		9.3672	1.62905
9.3744	0.589442		9.3744	2.33609		9.3744	2.77647		9.3744	1.7002
9.3816	0.586528		9.3816	2.39883		9.3816	2.93533		9.3816	1.77522
9.3888	0.583702		9.3888	2.46584		9.3888	3.10622		9.3888	1.8542
9.396	0.580955		9.396	2.53743		9.396	3.29047		9.396	1.93724
9.4032	0.57826		9.4032	2.61389		9.4032	3.48953		9.4032	2.02445
9.4104	0.575602		9.4104	2.69554		9.4104	3.70495		9.4104	2.11596
9.4176	0.572962		9.4176	2.78273		9.4176	3.93839		9.4176	2.21192
9.4248	0.570375		9.4248	2.87587		9.4248	4.19161		9.4248	2.31251
9.432	0.567841		9.432	2.9754		9.432	4.46647		9.432	2.41795
9.4392	0.565392		9.4392	3.08186		9.4392	4.76493		9.4392	2.52846
9.4464	0.56302		9.4464	3.19584		9.4464	5.08903		9.4464	2.64429
9.4536	0.560725		9.4536	3.318		9.4536	5.44095		9.4536	2.76568
9.4608	0.558507		9.4608	3.44908		9.4608	5.82296		9.4608	2.89288
9.468	0.55635		9.468	3.5899		9.468	6.23738		9.468	3.02613
9.4752	0.55424		9.4752	3.74138		9.4752	6.68657		9.4752	3.16577
9.4824	0.55213		9.4824	3.90449		9.4824	7.17282		9.4824	3.31215
9.4896	0.550008		9.4896	4.08033		9.4896	7.69842		9.4896	3.46571
9.4968	0.547856		9.4968	4.27011		9.4968	8.26553		9.4968	3.62697
9.504	0.545681		9.504	4.4752		9.504	8.8762		9.504	3.79655
9.5112	0.543505		9.5112	4.69708		9.5112	9.53233		9.5112	3.97518
9.5184	0.541341		9.5184	4.93739		9.5184	10.2356		9.5184	4.16369
9.5256	0.539196		9.5256	5.19791		9.5256	10.9873		9.5256	4.36298
9.5328	0.53708		9.5328	5.48059		9.5328	11.7887		9.5328	4.57408
9.54	0.535005		9.54	5.78749		9.54	12.6401		9.54	4.79811
9.5472	0.532961		9.5472	6.12083		9.5472	13.5416		9.5472	5.03636
9.5544	0.530952		9.5544	6.48289		9.5544	14.4925		9.5544	5.29026
9.5616	0.528967		9.5616	6.87608		9.5616	15.4916		9.5616	5.56148
9.5688	0.527		9.5688	7.30286		9.5688	16.5366		9.5688	5.85188
9.576	0.525057		9.576	7.76579		9.576	17.6244		9.576	6.16355
9.5832	0.523132		9.5832	8.26752		9.5832	18.7514		9.5832	6.49887
9.5904	0.521254		9.5904	8.81075		9.5904	19.9132		9.5904	6.86039
9.5976	0.519431		9.5976	9.39819		9.5976	21.1047		9.5976	7.25098
9.6048	0.517672		9.6048	10.0326		9.6048	22.3203		9.6048	7.67366
9.612	0.515997		9.612	10.7168		9.612	23.5537		9.612	8.1317
9.6192	0.514388		9.6192	11.4535		9.6192	24.7983		9.6192	8.62852
9.6264	0.512844		9.6264	12.2452		9.6264	26.0469		9.6264	9.16779
9.6336	0.511354		9.6336	13.0945		9.6336	27.2916		9.6336	9.75333
9.6408	0.509882		9.6408	14.0033		9.6408	28.5243		9.6408	10.3892
9.648	0.50841		9.648	14.9737		9.648	29.7359		9.648	11.0794
9.6552	0.506914		9.6552	16.007		9.6552	30.9172		9.6552	11.8285
9.6624	0.505376		9.6624	17.1041		9.6624	32.0584		9.6624	12.6406
9.6696	0.503802		9.6696	18.2655		9.6696	33.1495		9.6696	13.5203
9.6768	0.502217		9.6768	19.4907		9.6768	34.1808		9.6768	14.4719
9.684	0.500637		9.684	20.7789		9.684	35.1426		9.684	15.5
9.6912	0.499094		9.6912	22.1285		9.6912	36.0259		9.6912	16.6087
9.6984	0.497621		9.6984	23.5372		9.6984	36.8225		9.6984	17.8017
9.7056	0.49625		9.7056	25.002		9.7056	37.5248		9.7056	19.0826
9.7128	0.494993		9.7128	26.5194		9.7128	38.1264		9.7128	20.454
9.72	0.49386		9.72	28.085		9.72	38.6217		9.72	21.9183
9.7272	0.492853		9.7272	29.6937		9.7272	39.0062		9.7272	23.477
9.7344	0.491965		9.7344	31.3396		9.7344	39.2768		9.7344	25.1309
9.7416	0.491148		9.7416	33.016		9.7416	39.4312		9.7416	26.8801
9.7488	0.490367		9.7488	34.7151		9.7488	39.4681		9.7488	28.7236
9.756	0.489598		9.756	36.4284		9.756	39.3874		9.756	30.6594
9.7632	0.488812		9.7632	38.1467		9.7632	39.1903		9.7632	32.6847
9.7704	0.487983		9.7704	39.86		9.7704	38.8791		9.7704	34.7953
9.7776	0.487101		9.7776	41.5576		9.7776	38.4573		9.7776	36.9857
9.7848	0.486147		9.7848	43.2287		9.7848	37.9292		9.7848	39.2489
9.792	0.485134		9.792	44.862		9.792	37.3		9.792	41.5764
9.7992	0.484079		9.7992	46.4459		9.7992	36.5758		9.7992	43.9586
9.8064	0.483006		9.8064	47.9692		9.8064	35.7634		9.8064	46.3848
9.8136	0.481933		9.8136	49.4208		9.8136	34.8702		9.8136	48.8429
9.8208	0.480908		9.8208	50.7899		9.8208	33.9043		9.8208	51.3201
9.828	0.479931		9.828	52.0664		9.828	32.8739		9.828	53.8027
9.8352	0.479048		9.8352	53.2407		9.8352	31.7879		9.8352	56.276
9.8424	0.478274		9.8424	54.3039		9.8424	30.6551		9.8424	58.7249
9.8496	0.477612		9.8496	55.2479		9.8496	29.485		9.8496	61.1337
9.8568	0.477064		9.8568	56.0657		9.8568	28.2868		9.8568	63.4857
9.864	0.476593		9.864	56.7508		9.864	27.0695		9.864	65.7638
9.8712	0.476175		9.8712	57.298		9.8712	25.8421		9.8712	67.9505
9.8784	0.475764		9.8784	57.7029		9.8784	24.6127		9.8784	70.0281
9.8856	0.475347		9.8856	57.9621		9.8856	23.3894		9.8856	71.9794
9.8928	0.474876		9.8928	58.0737		9.8928	22.1794		9.8928	73.7879
9.9	0.474346		9.9	58.0369		9.9	20.9894		9.9	75.4379
9.9072	0.47375		9.9072	57.8522		9.9072	19.8252		9.9072	76.9152
9.9144	0.473118		9.9144	57.5213		9.9144	18.692		9.9144	78.2074
9.9216	0.472462		9.9216	57.0467		9.9216	17.5942		9.9216	79.3044
9.9288	0.471813		9.9288	56.4326		9.9288	16.5354		9.9288	80.1981
9.936	0.471187		9.936	55.684		9.936	15.5185		9.936	80.8826
9.9432	0.470602		9.9432	54.8071		9.9432	14.5458		9.9432	81.3535
9.9504	0.470078		9.9504	53.8087		9.9504	13.6188		9.9504	81.6084
9.9576	0.469595		9.9576	52.6969		9.9576	12.7385		9.9576	81.6464
9.9648	0.469154		9.9648	51.4803		9.9648	11.9052		9.9648	81.4683
9.972	0.468737		9.972	50.1686		9.972	11.1192		9.972	81.0761
9.9792	0.468332		9.9792	48.7724		9.9792	10.38		9.9792	80.4731
9.9864	0.467932		9.9864	47.3023		9.9864	9.68707		9.9864	79.664
9.9936	0.467545		9.9936	45.7693		9.9936	9.03938		9.9936	78.6555
10.0008	0.467139		10.0008	44.1844		10.0008	8.43574		10.0008	77.4562
10.008	0.466728		10.008	42.5587		10.008	7.87473		10.008	76.0766
10.0152	0.466293		10.0152	40.9027		10.0152	7.35466		10.0152	74.5287
10.0224	0.465828		10.0224	39.2269		10.0224	6.8737		10.0224	72.826
10.0296	0.465321		10.0296	37.5411		10.0296	6.42985		10.0296	70.983
10.0368	0.464773		10.0368	35.8546		10.0368	6.02098		10.0368	69.0156
10.044	0.464183		10.044	34.1761		10.044	5.64494		10.044	66.9397
10.0512	0.463551		10.0512	32.5139		10.0512	5.29956		10.0512	64.7718
10.0584	0.462913		10.0584	30.8756		10.0584	4.98266		10.0584	62.5278
10.0656	0.46227		10.0656	29.2684		10.0656	4.69214		10.0656	60.2236
10.0728	0.461638		10.0728	27.6984		10.0728	4.42594		10.0728	57.8747
10.08	0.461036		10.08	26.1712		10.08	4.1821		10.08	55.4963
10.0872	0.46047		10.0872	24.6915		10.0872	3.95877		10.0872	53.1029
10.0944	0.459945		10.0944	23.2633		10.0944	3.75425		10.0944	50.7084
10.1016	0.45948		10.1016	21.8899		10.1016	3.56689		10.1016	48.3257
10.1088	0.459069		10.1088	20.5737		10.1088	3.3952		10.1088	45.9667
10.116	0.458711		10.116	19.3164		10.116	3.2378		10.116	43.6423
10.1232	0.458407		10.1232	18.119		10.1232	3.09337		10.1232	41.3623
10.1304	0.458127		10.1304	16.982		10.1304	2.96074		10.1304	39.1355
10.1376	0.457859		10.1376	15.9053		10.1376	2.83881		10.1376	36.9693
10.1448	0.457591		10.1448	14.8885		10.1448	2.72656		10.1448	34.8703
10.152	0.457305		10.152	13.9309		10.152	2.62308		10.152	32.844
10.1592	0.456995		10.1592	13.0315		10.1592	2.52753		10.1592	30.895
10.1664	0.456643		10.1664	12.1889		10.1664	2.43915		10.1664	29.027
10.1736	0.45625		10.1736	11.4015		10.1736	2.35724		10.1736	27.2429
10.1808	0.455821		10.1808	10.6676		10.1808	2.28121		10.1808	25.5446
10.188	0.455362		10.188	9.98507		10.188	2.21049		10.188	23.9329
10.1952	0.454903		10.1952	9.35172		10.1952	2.14458		10.1952	22.4083
10.2024	0.454438		10.2024	8.76507		10.2024	2.08303		10.2024	20.9701
10.2096	0.453991		10.2096	8.22253		10.2096	2.02544		10.2096	19.617
10.2168	0.453544		10.2168	7.72146		10.2168	1.97145		10.2168	18.3472
10.224	0.45312		10.224	7.2592		10.224	1.92074		10.224	17.1582
10.2312	0.452727		10.2312	6.83315		10.2312	1.87305		10.2312	16.0473
10.2384	0.452363		10.2384	6.44082		10.2384	1.82813		10.2384	15.0112
10.2456	0.452042		10.2456	6.07986		10.2456	1.78574		10.2456	14.0469
10.2528	0.451755		10.2528	5.74808		10.2528	1.7457		10.2528	13.1508
10.26	0.451517		10.26	5.44339		10.26	1.70782		10.26	12.3196
10.2672	0.451326		10.2672	5.16381		10.2672	1.67193		10.2672	11.5497
10.2744	0.451165		10.2744	4.90748		10.2744	1.63785		10.2744	10.8378
10.2816	0.451028		10.2816	4.67259		10.2816	1.60544		10.2816	10.1804
10.2888	0.450885		10.2888	4.45741		10.2888	1.57453		10.2888	9.57406
10.296	0.45073		10.296	4.26031		10.296	1.54502		10.296	9.01545
10.3032	0.45054		10.3032	4.07973		10.3032	1.51676		10.3032	8.50115
10.3104	0.450325		10.3104	3.91417		10.3104	1.48966		10.3104	8.02787
10.3176	0.450075		10.3176	3.76229		10.3176	1.46362		10.3176	7.5924
10.3248	0.449806		10.3248	3.62285		10.3248	1.4386		10.3248	7.19167
10.332	0.44952		10.332	3.49474		10.332	1.41454		10.332	6.82277
10.3392	0.449234		10.3392	3.37696		10.3392	1.39145		10.3392	6.48298
10.3464	0.448978		10.3464	3.26859		10.3464	1.36932		10.3464	6.1698
10.3536	0.448763		10.3536	3.16879		10.3536	1.34812		10.3536	5.88097
10.3608	0.448602		10.3608	3.07682		10.3608	1.32785		10.3608	5.61441
10.368	0.448489		10.368	2.992		10.368	1.30848		10.368	5.36826
10.3752	0.44843		10.3752	2.9137		10.3752	1.28995		10.3752	5.14081
10.3824	0.448435		10.3824	2.84136		10.3824	1.27221		10.3824	4.93044
10.3896	0.448489		10.3896	2.77445		10.3896	1.25516		10.3896	4.73567
10.3968	0.448591		10.3968	2.71251		10.3968	1.2387		10.3968	4.55513
10.404	0.448716		10.404	2.65511		10.404	1.22277		10.404	4.38752
10.4112	0.448847		10.4112	2.60185		10.4112	1.2073		10.4112	4.23165
10.4184	0.448966		10.4184	2.55238		10.4184	1.19225		10.4184	4.08644
10.4256	0.449079		10.4256	2.50636		10.4256	1.17757		10.4256	3.95092
10.4328	0.449169		10.4328	2.46352		10.4328	1.16326		10.4328	3.82419
10.44	0.449234		10.44	2.4236		10.44	1.14931		10.44	3.70551
10.4472	0.44927		10.4472	2.38637		10.4472	1.13573		10.4472	3.5942
10.4544	0.449306		10.4544	2.35164		10.4544	1.12252		10.4544	3.4897
10.4616	0.449354		10.4616	2.31925		10.4616	1.10968		10.4616	3.3915
10.4688	0.449443		10.4688	2.28902		10.4688	1.09717		10.4688	3.29915
10.476	0.449598		10.476	2.26082		10.476	1.08497		10.476	3.21222
10.4832	0.449842		10.4832	2.23449		10.4832	1.07306		10.4832	3.13029
10.4904	0.450182		10.4904	2.20991		10.4904	1.06142		10.4904	3.05298
10.4976	0.450599		10.4976	2.18691		10.4976	1.05003		10.4976	2.9799
10.5048	0.451082		10.5048	2.16533		10.5048	1.03887		10.5048	2.91069
10.512	0.451595		10.512	2.14505		10.512	1.02795		10.512	2.84501
10.5192	0.452095		10.5192	2.12593		10.5192	1.01728		10.5192	2.78255
10.5264	0.452554		10.5264	2.10786		10.5264	1.00688		10.5264	2.72303
10.5336	0.45293		10.5336	2.09074		10.5336	0.996798		10.5336	2.66619
10.5408	0.453204		10.5408	2.07449		10.5408	0.987047		10.5408	2.61186
10.548	0.453401		10.548	2.05899		10.548	0.977629		10.548	2.55985
10.5552	0.453556		10.5552	2.04418		10.5552	0.968564		10.5552	2.51004
10.5624	0.453699		10.5624	2.03001		10.5624	0.959814		10.5624	2.46232
10.5696	0.453877		10.5696	2.01644		10.5696	0.951338		10.5696	2.41661
10.5768	0.454098		10.5768	2.00344		10.5768	0.943106		10.5768	2.3728
10.584	0.454408		10.584	1.99096		10.584	0.93506		10.584	2.33082
10.5912	0.454795		10.5912	1.97899		10.5912	0.927138		10.5912	2.29057
10.5984	0.455242		10.5984	1.96751		10.5984	0.919336		10.5984	2.25197
10.6056	0.455725		10.6056	1.9565		10.6056	0.911617		10.6056	2.21489
10.6128	0.456214		10.6128	1.94596		10.6128	0.903988		10.6128	2.17921
10.62	0.456661		10.62	1.93581		10.62	0.896466		10.62	2.14481
10.6272	0.45706		10.6272	1.92599		10.6272	0.889081		10.6272	2.1116
10.6344	0.4574		10.6344	1.91647		10.6344	0.881851		10.6344	2.07952
10.6416	0.457692		10.6416	1.90721		10.6416	0.874788		10.6416	2.04851
10.6488	0.457942		10.6488	1.89819		10.6488	0.867891		10.6488	2.01855
10.656	0.458175		10.656	1.8894		10.656	0.861168		10.656	1.98958
10.6632	0.458413		10.6632	1.88084		10.6632	0.854599		10.6632	1.96157
10.6704	0.458676		10.6704	1.87254		10.6704	0.848174		10.6704	1.93445
10.6776	0.45895		10.6776	1.86449		10.6776	0.841868		10.6776	1.9082
10.6848	0.459254		10.6848	1.8567		10.6848	0.835669		10.6848	1.88276
10.692	0.459582		10.692	1.84917		10.692	0.829554		10.692	1.85803
10.6992	0.459915		10.6992	1.84187		10.6992	0.823534		10.6992	1.83396
10.7064	0.460255		10.7064	1.83476		10.7064	0.817615		10.7064	1.81048
10.7136	0.460595		10.7136	1.8278		10.7136	0.811821		10.7136	1.78757
10.7208	0.460947		10.7208	1.82095		10.7208	0.806153		10.7208	1.76524
10.728	0.461322		10.728	1.81418		10.728	0.800621		10.728	1.74348
10.7352	0.461727		10.7352	1.80747		10.7352	0.795227		10.7352	1.72227
10.7424	0.46218		10.7424	1.80083		10.7424	0.789964		10.7424	1.70159
10.7496	0.462675		10.7496	1.79423		10.7496	0.784832		10.7496	1.68145
10.7568	0.463194		10.7568	1.78769		10.7568	0.779831		10.7568	1.66184
10.764	0.463736		10.764	1.78118		10.764	0.774938		10.764	1.64275
10.7712	0.46429		10.7712	1.77473		10.7712	0.770158		10.7712	1.62417
10.7784	0.464839		10.7784	1.76832		10.7784	0.765473		10.7784	1.60607
10.7856	0.465387		10.7856	1.76194		10.7856	0.760877		10.7856	1.58843
10.7928	0.465941		10.7928	1.75561		10.7928	0.756359		10.7928	1.57122
10.8	0.466508		10.8	1.74934		10.8	0.751919		10.8	1.55442
10.8072	0.46711		10.8072	1.74311		10.8072	0.747526		10.8072	1.53801
10.8144	0.467747		10.8144	1.73696		10.8144	0.743163		10.8144	1.52193
10.8216	0.468439		10.8216	1.7309		10.8216	0.738818		10.8216	1.50616
10.8288	0.469178		10.8288	1.72494		10.8288	0.734478		10.8288	1.49065
10.836	0.469953		10.836	1.71909		10.836	0.730175		10.836	1.47541
10.8432	0.470751		10.8432	1.71335		10.8432	0.725919		10.8432	1.46044
10.8504	0.471544		10.8504	1.70772		10.8504	0.721741		10.8504	1.44576
10.8576	0.472331		10.8576	1.70218		10.8576	0.717658		10.8576	1.43138
10.8648	0.473076		10.8648	1.69676		10.8648	0.7137		10.8648	1.41727
10.872	0.473785		10.872	1.69143		10.872	0.709862		10.872	1.40348
10.8792	0.474447		10.8792	1.68619		10.8792	0.706154		10.8792	1.38997
10.8864	0.475067		10.8864	1.68106		10.8864	0.702548		10.8864	1.37675
10.8936	0.475633		10.8936	1.67602		10.8936	0.699002		10.8936	1.36379
10.9008	0.476152		10.9008	1.67107		10.9008	0.695485		10.9008	1.35106
10.908	0.476635		10.908	1.66623		10.908	0.69195		10.908	1.33855
10.9152	0.477076		10.9152	1.66148		10.9152	0.688368		10.9152	1.32621
10.9224	0.477481		10.9224	1.65679		10.9224	0.684696		10.9224	1.31402
10.9296	0.477856		10.9296	1.65215		10.9296	0.680906		10.9296	1.30196
10.9368	0.478196		10.9368	1.64753		10.9368	0.677002		10.9368	1.29004
10.944	0.478506		10.944	1.64291		10.944	0.672978		10.944	1.27827
10.9512	0.478786		10.9512	1.63827		10.9512	0.668848		10.9512	1.26668
10.9584	0.479031		10.9584	1.63361		10.9584	0.664657		10.9584	1.25529
10.9656	0.479251		10.9656	1.62894		10.9656	0.660461		10.9656	1.24415
10.9728	0.479454		10.9728	1.62425		10.9728	0.656313		10.9728	1.23327
10.98	0.47965		10.98	1.61958		10.98	0.652301		10.98	1.22266
10.9872	0.479877		10.9872	1.61495		10.9872	0.648487		10.9872	1.21232
10.9944	0.480133		10.9944	1.6104		10.9944	0.644892		10.9944	1.20219
11.0016	0.480449		11.0016	1.60595		11.0016	0.641549		11.0016	1.19223
11.0088	0.480837		11.0088	1.60158		11.0088	0.638437		11.0088	1.18238
11.016	0.48129		11.016	1.59735		11.016	0.635517		11.016	1.17261
11.0232	0.481802		11.0232	1.5932		11.0232	0.632751		11.0232	1.16287
11.0304	0.482351		11.0304	1.58917		11.0304	0.630069		11.0304	1.15316
11.0376	0.482893		11.0376	1.58521		11.0376	0.627422		11.0376	1.1435
11.0448	0.483424		11.0448	1.58132		11.0448	0.62477		11.0448	1.13391
11.052	0.483912		11.052	1.57749		11.052	0.6221		11.052	1.12445
11.0592	0.484341		11.0592	1.57372		11.0592	0.619394		11.0592	1.11514
11.0664	0.484723		11.0664	1.57002		11.0664	0.616646		11.0664	1.10604
11.0736	0.485081		11.0736	1.5664		11.0736	0.613868		11.0736	1.09713
11.0808	0.485432		11.0808	1.56286		11.0808	0.611091		11.0808	1.08842
11.088	0.485814		11.088	1.55941		11.088	0.608325		11.088	1.0799
11.0952	0.486249		11.0952	1.55604		11.0952	0.605577		11.0952	1.07154
11.1024	0.486737		11.1024	1.55275		11.1024	0.602883		11.1024	1.06329
11.1096	0.487274		11.1096	1.54952		11.1096	0.600213		11.1096	1.05512
11.1168	0.487846		11.1168	1.54633		11.1168	0.597596		11.1168	1.04702
11.124	0.488424		11.124	1.54316		11.124	0.595021		11.124	1.03895
11.1312	0.488973		11.1312	1.54001		11.1312	0.592488		11.1312	1.03093
11.1384	0.489473		11.1384	1.53688		11.1384	0.589985		11.1384	1.02296
11.1456	0.489914		11.1456	1.5338		11.1456	0.587505		11.1456	1.01507
11.1528	0.49029		11.1528	1.53078		11.1528	0.585037		11.1528	1.00727
11.16	0.490612		11.16	1.52785		11.16	0.582588		11.16	0.999582
11.1672	0.49091		11.1672	1.52499		11.1672	0.58015		11.1672	0.992048
11.1744	0.491196		11.1744	1.52222		11.1744	0.577748		11.1744	0.984687
11.1816	0.491494		11.1816	1.51954		11.1816	0.575393		11.1816	0.97751
11.1888	0.491804		11.1888	1.51691		11.1888	0.573093		11.1888	0.970507
11.196	0.492108		11.196	1.51432		11.196	0.570846		11.196	0.963664
11.2032	0.492412		11.2032	1.51174		11.2032	0.568652		11.2032	0.95697
11.2104	0.492674		11.2104	1.50916		11.2104	0.566506		11.2104	0.95042
11.2176	0.492901		11.2176	1.50661		11.2176	0.564384		11.2176	0.943983
11.2248	0.493061		11.2248	1.50409		11.2248	0.562245		11.2248	0.937635
11.232	0.493157		11.232	1.50162		11.232	0.560069		11.232	0.931352
11.2392	0.493205		11.2392	1.49921		11.2392	0.55784		11.2392	0.92513
11.2464	0.493199		11.2464	1.49687		11.2464	0.555551		11.2464	0.918943
11.2536	0.493181		11.2536	1.49461		11.2536	0.553215		11.2536	0.912798
11.2608	0.493181		11.2608	1.49241		11.2608	0.55086		11.2608	0.906682
11.268	0.493187		11.268	1.49028		11.268	0.548506		11.268	0.90059
11.2752	0.493234		11.2752	1.48821		11.2752	0.546193		11.2752	0.894517
11.2824	0.493324		11.2824	1.48622		11.2824	0.543946		11.2824	0.888467
11.2896	0.493443		11.2896	1.4843		11.2896	0.541794		11.2896	0.882453
11.2968	0.493586		11.2968	1.48249		11.2968	0.539738		11.2968	0.876492
11.304	0.493741		11.304	1.48076		11.304	0.537765		11.304	0.870591
11.3112	0.493884		11.3112	1.47914		11.3112	0.535864		11.3112	0.864774
11.3184	0.494015		11.3184	1.4776		11.3184	0.534022		11.3184	0.859058
11.3256	0.49414		11.3256	1.47614		11.3256	0.532222		11.3256	0.853467
11.3328	0.494271		11.3328	1.47472		11.3328	0.530451		11.3328	0.848013
11.34	0.494403		11.34	1.47332		11.34	0.528723		11.34	0.842714
11.3472	0.494558		11.3472	1.47191		11.3472	0.527012		11.3472	0.837558
11.3544	0.494742		11.3544	1.47051		11.3544	0.525349		11.3544	0.832522
11.3616	0.494981		11.3616	1.46911		11.3616	0.523716		11.3616	0.827587
11.3688	0.495237		11.3688	1.46774		11.3688	0.522095		11.3688	0.822717
11.376	0.495523		11.376	1.46639		11.376	0.520492		11.376	0.817877
11.3832	0.495797		11.3832	1.4651		11.3832	0.518876		11.3832	0.813019
11.3904	0.496042		11.3904	1.46385		11.3904	0.517237		11.3904	0.808126
11.3976	0.496244		11.3976	1.46266		11.3976	0.515562		11.3976	0.803167
11.4048	0.496393		11.4048	1.46152		11.4048	0.513869		11.4048	0.798124
11.412	0.496477		11.412	1.4604		11.412	0.512165		11.412	0.793016
11.4192	0.496489		11.4192	1.4593		11.4192	0.51046		11.4192	0.787866
11.4264	0.496435		11.4264	1.45817		11.4264	0.508761		11.4264	0.78271
11.4336	0.49634		11.4336	1.45701		11.4336	0.507086		11.4336	0.777584
11.4408	0.496227		11.4408	1.45578		11.4408	0.505453		11.4408	0.772518
11.448	0.496095		11.448	1.4545		11.448	0.503862		11.448	0.767547
11.4552	0.495988		11.4552	1.45313		11.4552	0.502294		11.4552	0.762677
11.4624	0.495899		11.4624	1.45166		11.4624	0.50075		11.4624	0.757903
11.4696	0.495851		11.4696	1.45009		11.4696	0.499231		11.4696	0.753224
11.4768	0.495845		11.4768	1.44839		11.4768	0.497758		11.4768	0.74861
11.484	0.495893		11.484	1.44657		11.484	0.49634		11.484	0.744051
11.4912	0.495976		11.4912	1.44464		11.4912	0.494975		11.4912	0.739527
11.4984	0.496101		11.4984	1.44257		11.4984	0.493675		11.4984	0.735027
11.5056	0.496256		11.5056	1.44039		11.5056	0.49243		11.5056	0.730544
11.5128	0.496423		11.5128	1.43807		11.5128	0.491232		11.5128	0.72611
11.52	0.496602		11.52	1.43563		11.52	0.490063		11.52	0.721723
11.5272	0.496757		11.5272	1.43309		11.5272	0.488925		11.5272	0.717407
11.5344	0.496864		11.5344	1.43043		11.5344	0.487781		11.5344	0.713175
11.5416	0.496924		11.5416	1.4277		11.5416	0.48663		11.5416	0.709045
11.5488	0.49693		11.5488	1.42493		11.5488	0.485468		11.5488	0.70504
11.556	0.496882		11.556	1.42214		11.556	0.484294		11.556	0.701171
11.5632	0.496781		11.5632	1.41939		11.5632	0.483113		11.5632	0.697458
11.5704	0.496626		11.5704	1.4167		11.5704	0.481933		11.5704	0.693899
11.5776	0.496453		11.5776	1.41413		11.5776	0.480747		11.5776	0.690478
11.5848	0.496262		11.5848	1.41168		11.5848	0.479561		11.5848	0.687182
11.592	0.496095		11.592	1.40941		11.592	0.478363		11.592	0.683987
11.5992	0.495946		11.5992	1.40729		11.5992	0.477159		11.5992	0.68087
11.6064	0.495833		11.6064	1.40535		11.6064	0.475937		11.6064	0.677818
11.6136	0.495738		11.6136	1.40358		11.6136	0.474715		11.6136	0.674814
11.6208	0.495672		11.6208	1.40193		11.6208	0.473511		11.6208	0.67184
11.628	0.495607		11.628	1.40037		11.628	0.472319		11.628	0.668901
11.6352	0.495547		11.6352	1.39888		11.6352	0.471163		11.6352	0.666004
11.6424	0.495464		11.6424	1.39741		11.6424	0.47003		11.6424	0.663173
11.6496	0.495338		11.6496	1.39593		11.6496	0.468928		11.6496	0.660396
11.6568	0.495171		11.6568	1.39442		11.6568	0.467861		11.6568	0.657672
11.664	0.494939		11.664	1.39288		11.664	0.466842		11.664	0.654948
11.6712	0.494635		11.6712	1.39133		11.6712	0.465858		11.6712	0.652188
11.6784	0.494266		11.6784	1.38981		11.6784	0.464916		11.6784	0.649375
11.6856	0.493842		11.6856	1.38835		11.6856	0.464022		11.6856	0.646478
11.6928	0.493372		11.6928	1.38699		11.6928	0.463194		11.6928	0.643498
11.7	0.492889		11.7	1.38575		11.7	0.462449		11.7	0.640458
11.7072	0.492394		11.7072	1.38466		11.7072	0.461787		11.7072	0.637376
11.7144	0.491917		11.7144	1.3837		11.7144	0.461227		11.7144	0.634313
11.7216	0.491482		11.7216	1.38285		11.7216	0.46075		11.7216	0.631326
11.7288	0.491083		11.7288	1.3821		11.7288	0.460345		11.7288	0.628459
11.736	0.490743		11.736	1.3814		11.736	0.459981		11.736	0.625718
11.7432	0.490445		11.7432	1.38074		11.7432	0.459647		11.7432	0.623107
11.7504	0.490177		11.7504	1.38006		11.7504	0.459296		11.7504	0.620586
11.7576	0.489932		11.7576	1.37936		11.7576	0.458896		11.7576	0.618124
11.7648	0.489706		11.7648	1.3786		11.7648	0.458449		11.7648	0.615668
11.772	0.489491		11.772	1.37777		11.772	0.457925		11.772	0.613195
11.7792	0.489271		11.7792	1.37688		11.7792	0.457311		11.7792	0.610691
11.7864	0.489038		11.7864	1.3759		11.7864	0.456601		11.7864	0.608158
11.7936	0.488782		11.7936	1.37485		11.7936	0.455797		11.7936	0.605625
11.8008	0.48852		11.8008	1.37376		11.8008	0.454903		11.8008	0.60311
11.808	0.488239		11.808	1.37263		11.808	0.453949		11.808	0.600642
11.8152	0.487959		11.8152	1.37149		11.8152	0.452954		11.8152	0.598246
11.8224	0.487667		11.8224	1.37034		11.8224	0.451928		11.8224	0.595945
11.8296	0.487393		11.8296	1.36921		11.8296	0.450897		11.8296	0.593728
11.8368	0.487137		11.8368	1.3681		11.8368	0.449884		11.8368	0.591594
11.844	0.486922		11.844	1.367		11.844	0.448918		11.844	0.58952
11.8512	0.486749		11.8512	1.36589		11.8512	0.448012		11.8512	0.587487
11.8584	0.486606		11.8584	1.36477		11.8584	0.447166		11.8584	0.585496
11.8656	0.486487		11.8656	1.36362		11.8656	0.446403		11.8656	0.583535
11.8728	0.486386		11.8728	1.36244		11.8728	0.445723		11.8728	0.581604
11.88	0.486285		11.88	1.36124		11.88	0.445128		11.88	0.579697
11.8872	0.486165		11.8872	1.36001		11.8872	0.444627		11.8872	0.577825
11.8944	0.485998		11.8944	1.35877		11.8944	0.444215		11.8944	0.575978
11.9016	0.48576		11.9016	1.35751		11.9016	0.443882		11.9016	0.57416
11.9088	0.485456		11.9088	1.35626		11.9088	0.443613		11.9088	0.57236
11.916	0.485098		11.916	1.35503		11.916	0.443375		11.916	0.570565
11.9232	0.484681		11.9232	1.35382		11.9232	0.443149		11.9232	0.568789
11.9304	0.484216		11.9304	1.35264		11.9304	0.442904		11.9304	0.567031
11.9376	0.48371		11.9376	1.35147		11.9376	0.44263		11.9376	0.565308
11.9448	0.483167		11.9448	1.35032		11.9448	0.44232		11.9448	0.563627
11.952	0.482595		11.952	1.34919		11.952	0.441998		11.952	0.561994
11.9592	0.481987		11.9592	1.34805		11.9592	0.441653		11.9592	0.560415
11.9664	0.481349		11.9664	1.3469		11.9664	0.441319		11.9664	0.558925
11.9736	0.480676		11.9736	1.34572		11.9736	0.440997		11.9736	0.557524
11.9808	0.479978		11.9808	1.34454		11.9808	0.440693		11.9808	0.556189
11.988	0.479293		11.988	1.34336		11.988	0.440377		11.988	0.554919
11.9952	0.478619		11.9952	1.3422		11.9952	0.440037		11.9952	0.553691
12.0024	0.477982		12.0024	1.34109		12.0024	0.439632		12.0024	0.552493
12.0096	0.477386		12.0096	1.34005		12.0096	0.439143		12.0096	0.551301
12.0168	0.476819		12.0168	1.3391		12.0168	0.438565		12.0168	0.550097
12.024	0.476295		12.024	1.3382		12.024	0.437903		12.024	0.548881
12.0312	0.475794		12.0312	1.33735		12.0312	0.437188		12.0312	0.547624
12.0384	0.475317		12.0384	1.3365		12.0384	0.436455		12.0384	0.546336
12.0456	0.474846		12.0456	1.33563		12.0456	0.435734		12.0456	0.545007
12.0528	0.474387		12.0528	1.33473		12.0528	0.435066		12.0528	0.543654
12.06	0.47394		12.06	1.33378		12.06	0.434476		12.06	0.542277
12.0672	0.473523		12.0672	1.33278		12.0672	0.433976		12.0672	0.540906
12.0744	0.473148		12.0744	1.33175		12.0744	0.433558		12.0744	0.539547
12.0816	0.472796		12.0816	1.33074		12.0816	0.433189		12.0816	0.538224
12.0888	0.472438		12.0888	1.32978		12.0888	0.432831		12.0888	0.536931
12.096	0.472057		12.096	1.32888		12.096	0.432444		12.096	0.535685
12.1032	0.471622		12.1032	1.32803		12.1032	0.431997		12.1032	0.534481
12.1104	0.471121		12.1104	1.3272		12.1104	0.431478		12.1104	0.533307
12.1176	0.470549		12.1176	1.32635		12.1176	0.43087		12.1176	0.532156
12.1248	0.469911		12.1248	1.32542		12.1248	0.430173		12.1248	0.531018
12.132	0.46922		12.132	1.32435		12.132	0.429416		12.132	0.529873
12.1392	0.468498		12.1392	1.32311		12.1392	0.428623		12.1392	0.528711
12.1464	0.467765		12.1464	1.32168		12.1464	0.427836		12.1464	0.527549
12.1536	0.467056		12.1536	1.32007		12.1536	0.427103		12.1536	0.52641
12.1608	0.466365		12.1608	1.31832		12.1608	0.426447		12.1608	0.52532
12.168	0.465703		12.168	1.31651		12.168	0.425899		12.168	0.5243
12.1752	0.465071		12.1752	1.31466		12.1752	0.42544		12.1752	0.523341
12.1824	0.464451		12.1824	1.31282		12.1824	0.425071		12.1824	0.522459
12.1896	0.463837		12.1896	1.31102		12.1896	0.424784		12.1896	0.521642
12.1968	0.463224		12.1968	1.30927		12.1968	0.424552		12.1968	0.520885
12.204	0.462622		12.204	1.30756		12.204	0.424355		12.204	0.520176
12.2112	0.462019		12.2112	1.30585		12.2112	0.424171		12.2112	0.519455
12.2184	0.461441		12.2184	1.30415		12.2184	0.423986		12.2184	0.518698
12.2256	0.460869		12.2256	1.30244		12.2256	0.423789		12.2256	0.517887
12.2328	0.460321		12.2328	1.30075		12.2328	0.423586		12.2328	0.517017
12.24	0.459796		12.24	1.29911		12.24	0.423378		12.24	0.516099
12.2472	0.459296		12.2472	1.29757		12.2472	0.423163		12.2472	0.515139
12.2544	0.458819		12.2544	1.29618		12.2544	0.422919		12.2544	0.514156
12.2616	0.458348		12.2616	1.29498		12.2616	0.422627		12.2616	0.513136
12.2688	0.457859		12.2688	1.29403		12.2688	0.422269		12.2688	0.512099
12.276	0.45734		12.276	1.29335		12.276	0.42184		12.276	0.511038
12.2832	0.456774		12.2832	1.29294		12.2832	0.421333		12.2832	0.50996
12.2904	0.45616		12.2904	1.29279		12.2904	0.420743		12.2904	0.508857
12.2976	0.455517		12.2976	1.29288		12.2976	0.420082		12.2976	0.507712
12.3048	0.454843		12.3048	1.29318		12.3048	0.419384		12.3048	0.506544
12.312	0.45417		12.312	1.29367		12.312	0.418699		12.312	0.505346
12.3192	0.453514		12.3192	1.29434		12.3192	0.418067		12.3192	0.50416
12.3264	0.452924		12.3264	1.29519		12.3264	0.417525		12.3264	0.50301
12.3336	0.452441		12.3336	1.29618		12.3336	0.417095		12.3336	0.501913
12.3408	0.452077		12.3408	1.29731		12.3408	0.416785		12.3408	0.500882
12.348	0.451821		12.348	1.29856		12.348	0.416595		12.348	0.499928
12.3552	0.451672		12.3552	1.29991		12.3552	0.416475		12.3552	0.499034
12.3624	0.451612		12.3624	1.30132		12.3624	0.416398		12.3624	0.498211
12.3696	0.451607		12.3696	1.30276		12.3696	0.416315		12.3696	0.497431
12.3768	0.45163		12.3768	1.30417		12.3768	0.416177		12.3768	0.496668
12.384	0.45166		12.384	1.3055		12.384	0.415939		12.384	0.495905
12.3912	0.451654		12.3912	1.30671		12.3912	0.415569		12.3912	0.495118
12.3984	0.451607		12.3984	1.30778		12.3984	0.415063		12.3984	0.494313
12.4056	0.451523		12.4056	1.30867		12.4056	0.414425		12.4056	0.493473
12.4128	0.45141		12.4128	1.3094		12.4128	0.413674		12.4128	0.492585
12.42	0.451285		12.42	1.30993		12.42	0.412857		12.42	0.491655
12.4272	0.451148		12.4272	1.3103		12.4272	0.412029		12.4272	0.490671
12.4344	0.451028		12.4344	1.31053		12.4344	0.41123		12.4344	0.489628
12.4416	0.450927		12.4416	1.31063		12.4416	0.410527		12.4416	0.488544
12.4488	0.450856		12.4488	1.31065		12.4488	0.409961		12.4488	0.487423
12.456	0.450808		12.456	1.3106		12.456	0.40955		12.456	0.486296
12.4632	0.450778		12.4632	1.3105		12.4632	0.409305		12.4632	0.485188
12.4704	0.450724		12.4704	1.31041		12.4704	0.409186		12.4704	0.484121
12.4776	0.450635		12.4776	1.31032		12.4776	0.409162		12.4776	0.483113
12.4848	0.45048		12.4848	1.31028		12.4848	0.40918		12.4848	0.482184
12.492	0.450248		12.492	1.31027		12.492	0.409192		12.492	0.481325
12.4992	0.449943		12.4992	1.31027		12.4992	0.40915		12.4992	0.480533
12.5064	0.449568		12.5064	1.31028		12.5064	0.409019		12.5064	0.479788
12.5136	0.449127		12.5136	1.31027		12.5136	0.408781		12.5136	0.47906
12.5208	0.44865		12.5208	1.31023		12.5208	0.408447		12.5208	0.478339
12.528	0.448155		12.528	1.31014		12.528	0.408047		12.528	0.477594
12.5352	0.447667		12.5352	1.30998		12.5352	0.407594		12.5352	0.476813
12.5424	0.447208		12.5424	1.30976		12.5424	0.407112		12.5424	0.476003
12.5496	0.446767		12.5496	1.3095		12.5496	0.406629		12.5496	0.475162
12.5568	0.446349		12.5568	1.30922		12.5568	0.406158		12.5568	0.474286
12.564	0.445926		12.564	1.30894		12.564	0.405699		12.564	0.473392
12.5712	0.445515		12.5712	1.30868		12.5712	0.405258		12.5712	0.472486
12.5784	0.445092		12.5784	1.30848		12.5784	0.404811		12.5784	0.47158
12.5856	0.444669		12.5856	1.30835		12.5856	0.404364		12.5856	0.470674
12.5928	0.444245		12.5928	1.30829		12.5928	0.403911		12.5928	0.46975
12.6	0.443828		12.6	1.30832		12.6	0.403452		12.6	0.468826
12.6072	0.443429		12.6072	1.30846		12.6072	0.402987		12.6072	0.467902
12.6144	0.443065		12.6144	1.30868		12.6144	0.402528		12.6144	0.466979
12.6216	0.442731		12.6216	1.30897		12.6216	0.402081		12.6216	0.466073
12.6288	0.442421		12.6288	1.30928		12.6288	0.401658		12.6288	0.465178
12.636	0.442129		12.636	1.3096		12.636	0.401276		12.636	0.464284
12.6432	0.441819		12.6432	1.3099		12.6432	0.400925		12.6432	0.463414
12.6504	0.44148		12.6504	1.31018		12.6504	0.400603		12.6504	0.462562
12.6576	0.441098		12.6576	1.31041		12.6576	0.400311		12.6576	0.461745
12.6648	0.440663		12.6648	1.31062		12.6648	0.400037		12.6648	0.460958
12.672	0.440198		12.672	1.31081		12.672	0.399786		12.672	0.46019
12.6792	0.439709		12.6792	1.311		12.6792	0.399548		12.6792	0.459444
12.6864	0.439215		12.6864	1.31121		12.6864	0.399327		12.6864	0.458717
12.6936	0.438744		12.6936	1.31146		12.6936	0.399143		12.6936	0.458014
12.7008	0.438333		12.7008	1.31174		12.7008	0.39897		12.7008	0.457334
12.708	0.437999		12.708	1.31201		12.708	0.398833		12.708	0.456661
12.7152	0.437748		12.7152	1.31226		12.7152	0.398731		12.7152	0.45597
12.7224	0.43757		12.7224	1.31249		12.7224	0.398654		12.7224	0.455248
12.7296	0.437439		12.7296	1.31265		12.7296	0.398606		12.7296	0.454515
12.7368	0.437325		12.7368	1.31275		12.7368	0.398594		12.7368	0.453764
12.744	0.437206		12.744	1.31276		12.744	0.398588		12.744	0.453007
12.7512	0.437057		12.7512	1.31268		12.7512	0.398576		12.7512	0.452232
12.7584	0.436825		12.7584	1.31253		12.7584	0.398535		12.7584	0.451428
12.7656	0.436521		12.7656	1.31232		12.7656	0.398451		12.7656	0.450599
12.7728	0.436139		12.7728	1.31208		12.7728	0.398326		12.7728	0.449777
12.78	0.435692		12.78	1.31182		12.78	0.398141		12.78	0.44896
12.7872	0.435221		12.7872	1.31155		12.7872	0.397909		12.7872	0.448179
12.7944	0.434732		12.7944	1.31128		12.7944	0.397617		12.7944	0.44741
12.8016	0.43425		12.8016	1.31105		12.8016	0.397295		12.8016	0.446677
12.8088	0.433785		12.8088	1.31086		12.8088	0.396967		12.8088	0.445992
12.816	0.43335		12.816	1.31071		12.816	0.396645		12.816	0.445378
12.8232	0.43295		12.8232	1.31059		12.8232	0.396347		12.8232	0.444835
12.8304	0.432599		12.8304	1.3105		12.8304	0.396067		12.8304	0.444364
12.8376	0.432277		12.8376	1.31041		12.8376	0.395811		12.8376	0.443947
12.8448	0.431973		12.8448	1.3103		12.8448	0.395584		12.8448	0.443572
12.852	0.431693		12.852	1.31016		12.852	0.395369		12.852	0.44322
12.8592	0.431424		12.8592	1.30998		12.8592	0.395167		12.8592	0.442862
12.8664	0.431168		12.8664	1.30975		12.8664	0.394946		12.8664	0.442487
12.8736	0.43093		12.8736	1.30949		12.8736	0.394702		12.8736	0.442076
12.8808	0.430685		12.8808	1.3092		12.8808	0.394428		12.8808	0.441593
12.888	0.430435		12.888	1.30892		12.888	0.39413		12.888	0.441051
12.8952	0.430196		12.8952	1.30864		12.8952	0.393838		12.8952	0.44046
12.9024	0.429946		12.9024	1.30838		12.9024	0.393558		12.9024	0.439835
12.9096	0.429702		12.9096	1.30815		12.9096	0.393307		12.9096	0.439197
12.9168	0.429457		12.9168	1.30795		12.9168	0.393093		12.9168	0.438577
12.924	0.429213		12.924	1.30776		12.924	0.392944		12.924	0.438011
12.9312	0.428986		12.9312	1.3076		12.9312	0.39286		12.9312	0.43751
12.9384	0.42876		12.9384	1.30742		12.9384	0.392866		12.9384	0.437093
12.9456	0.428534		12.9456	1.30723		12.9456	0.392932		12.9456	0.436771
12.9528	0.428313		12.9528	1.307		12.9528	0.393039		12.9528	0.436521
12.96	0.428092		12.96	1.30672		12.96	0.393182		12.96	0.436306
12.9672	0.427878		12.9672	1.30636		12.9672	0.393343		12.9672	0.436097
12.9744	0.427657		12.9744	1.30593		12.9744	0.393522		12.9744	0.435871
12.9816	0.427443		12.9816	1.30543		12.9816	0.393713		12.9816	0.435579
12.9888	0.427216		12.9888	1.30488		12.9888	0.393897		12.9888	0.435221
12.996	0.42699		12.996	1.30434		12.996	0.394058		12.996	0.434786
13.0032	0.426763		13.0032	1.30385		13.0032	0.394195		13.0032	0.434279
13.0104	0.426525		13.0104	1.30345		13.0104	0.394309		13.0104	0.433731
13.0176	0.426275		13.0176	1.30315		13.0176	0.39438		13.0176	0.433171
13.0248	0.425994		13.0248	1.30298		13.0248	0.39441		13.0248	0.432634
13.032	0.425673		13.032	1.30291		13.032	0.394368		13.032	0.432134
13.0392	0.425321		13.0392	1.30292		13.0392	0.394261		13.0392	0.431669
13.0464	0.424933		13.0464	1.30296		13.0464	0.394076		13.0464	0.43124
13.0536	0.424516		13.0536	1.30299		13.0536	0.393826		13.0536	0.430822
13.0608	0.424069		13.0608	1.30298		13.0608	0.39351		13.0608	0.430387
13.068	0.423598		13.068	1.30292		13.068	0.393146		13.068	0.429893
13.0752	0.423121		13.0752	1.3028		13.0752	0.392741		13.0752	0.429326
13.0824	0.422639		13.0824	1.30266		13.0824	0.392306		13.0824	0.428653
13.0896	0.42218		13.0896	1.30249		13.0896	0.391841		13.0896	0.42789
13.0968	0.421745		13.0968	1.30233		13.0968	0.391376		13.0968	0.427049
13.104	0.421327		13.104	1.30219		13.104	0.390929		13.104	0.426167
13.1112	0.420952		13.1112	1.30208		13.1112	0.390524		13.1112	0.425261
13.1184	0.420618		13.1184	1.30199		13.1184	0.390154		13.1184	0.424391
13.1256	0.42032		13.1256	1.3019		13.1256	0.389832		13.1256	0.42358
13.1328	0.420058		13.1328	1.30181		13.1328	0.38957		13.1328	0.422871
13.14	0.419807		13.14	1.30172		13.14	0.389373		13.14	0.422281
13.1472	0.419551		13.1472	1.3016		13.1472	0.38923		13.1472	0.421786
13.1544	0.419289		13.1544	1.30146		13.1544	0.389135		13.1544	0.421381
13.1616	0.419015		13.1616	1.30128		13.1616	0.389045		13.1616	0.421029
13.1688	0.418711		13.1688	1.30106		13.1688	0.388932		13.1688	0.420702
13.176	0.418389		13.176	1.30079		13.176	0.388789		13.176	0.420368
13.1832	0.418037		13.1832	1.30047		13.1832	0.38861		13.1832	0.419992
13.1904	0.417674		13.1904	1.30011		13.1904	0.388384		13.1904	0.419563
13.1976	0.417322		13.1976	1.2997		13.1976	0.388116		13.1976	0.419056
13.2048	0.417006		13.2048	1.29925		13.2048	0.387812		13.2048	0.418484
13.212	0.416726		13.212	1.2988		13.212	0.387514		13.212	0.417858
13.2192	0.416488		13.2192	1.29837		13.2192	0.387228		13.2192	0.417203
13.2264	0.416285		13.2264	1.29797		13.2264	0.386995		13.2264	0.416535
13.2336	0.4161		13.2336	1.29762		13.2336	0.38681		13.2336	0.415885
13.2408	0.415945		13.2408	1.29735		13.2408	0.386685		13.2408	0.415283
13.248	0.415784		13.248	1.29714		13.248	0.386608		13.248	0.414735
13.2552	0.415599		13.2552	1.29699		13.2552	0.386572		13.2552	0.41427
13.2624	0.415385		13.2624	1.29688		13.2624	0.38656		13.2624	0.413877
13.2696	0.415116		13.2696	1.29678		13.2696	0.386542		13.2696	0.413567
13.2768	0.414783		13.2768	1.29666		13.2768	0.386494		13.2768	0.413322
13.284	0.414401		13.284	1.2965		13.284	0.386399		13.284	0.413132
13.2912	0.41396		13.2912	1.2963		13.2912	0.38625		13.2912	0.412983
13.2984	0.413477		13.2984	1.29603		13.2984	0.386024		13.2984	0.412857
13.3056	0.412965		13.3056	1.29566		13.3056	0.385737		13.3056	0.412726
13.3128	0.41244		13.3128	1.29519		13.3128	0.385404		13.3128	0.412577
13.32	0.411934		13.32	1.29464		13.32	0.38507		13.32	0.412393
13.3272	0.411457		13.3272	1.29403		13.3272	0.38476		13.3272	0.412136
13.3344	0.41104		13.3344	1.29337		13.3344	0.38451		13.3344	0.411814
13.3416	0.410682		13.3416	1.29266		13.3416	0.384343		13.3416	0.411409
13.3488	0.41039		13.3488	1.29193		13.3488	0.384265		13.3488	0.410944
13.356	0.410145		13.356	1.29117		13.356	0.384271		13.356	0.410432
13.3632	0.409919		13.3632	1.29042		13.3632	0.384355		13.3632	0.409913
13.3704	0.409716		13.3704	1.28967		13.3704	0.384492		13.3704	0.409418
13.3776	0.409526		13.3776	1.28893		13.3776	0.384647		13.3776	0.408965
13.3848	0.409341		13.3848	1.28819		13.3848	0.384813		13.3848	0.408602
13.392	0.40915		13.392	1.28745		13.392	0.384957		13.392	0.408334
13.3992	0.408971		13.3992	1.28673		13.3992	0.38507		13.3992	0.408161
13.4064	0.408799		13.4064	1.28602		13.4064	0.385153		13.4064	0.408077
13.4136	0.408643		13.4136	1.28533		13.4136	0.385207		13.4136	0.408077
13.4208	0.408518		13.4208	1.28463		13.4208	0.385213		13.4208	0.408101
13.428	0.408411		13.428	1.28395		13.428	0.385195		13.428	0.408143
13.4352	0.408328		13.4352	1.28327		13.4352	0.38513		13.4352	0.408149
13.4424	0.408256		13.4424	1.28261		13.4424	0.385052		13.4424	0.408101
13.4496	0.408179		13.4496	1.28201		13.4496	0.384951		13.4496	0.407976
13.4568	0.408101		13.4568	1.28145		13.4568	0.384849		13.4568	0.407773
13.464	0.408006		13.464	1.28096		13.464	0.384766		13.464	0.407487
13.4712	0.407886		13.4712	1.28054		13.4712	0.384712		13.4712	0.407129
13.4784	0.40772		13.4784	1.2802		13.4784	0.384694		13.4784	0.40673
13.4856	0.407505		13.4856	1.27991		13.4856	0.384712		13.4856	0.406319
13.4928	0.407231		13.4928	1.27967		13.4928	0.384766		13.4928	0.405949
13.5	0.406915		13.5	1.27943		13.5	0.384819		13.5	0.405657
13.5072	0.406551		13.5072	1.27918		13.5072	0.384873		13.5072	0.405467
13.5144	0.406176		13.5144	1.27893		13.5144	0.384915		13.5144	0.405395
13.5216	0.4058		13.5216	1.27865		13.5216	0.384921		13.5216	0.405455
13.5288	0.405455		13.5288	1.27836		13.5288	0.384891		13.5288	0.405645
13.536	0.405174		13.536	1.27806		13.536	0.384837		13.536	0.405932
13.5432	0.404978		13.5432	1.27776		13.5432	0.384772		13.5432	0.406301
13.5504	0.404853		13.5504	1.27744		13.5504	0.3847		13.5504	0.406694
13.5576	0.404781		13.5576	1.27711		13.5576	0.384647		13.5576	0.407094
13.5648	0.404751		13.5648	1.27674		13.5648	0.384599		13.5648	0.407475
13.572	0.404728		13.572	1.27633		13.572	0.384581		13.572	0.407803
13.5792	0.404674		13.5792	1.27586		13.5792	0.384599		13.5792	0.408077
13.5864	0.404561		13.5864	1.27536		13.5864	0.384647		13.5864	0.40828
13.5936	0.404364		13.5936	1.27484		13.5936	0.384736		13.5936	0.408417
13.6008	0.404072		13.6008	1.27434		13.6008	0.384861		13.6008	0.408512
13.608	0.403714		13.608	1.27389		13.608	0.38501		13.608	0.408584
13.6152	0.403309		13.6152	1.27348		13.6152	0.385183		13.6152	0.408632
13.6224	0.40288		13.6224	1.27313		13.6224	0.385362		13.6224	0.408685
13.6296	0.402468		13.6296	1.27285		13.6296	0.385523		13.6296	0.408751
13.6368	0.402093		13.6368	1.27262		13.6368	0.385654		13.6368	0.408846
13.644	0.401771		13.644	1.2724		13.644	0.385755		13.644	0.408959
13.6512	0.401527		13.6512	1.27218		13.6512	0.385827		13.6512	0.409102
13.6584	0.401354		13.6584	1.27193		13.6584	0.385886		13.6584	0.409257
13.6656	0.401235		13.6656	1.27164		13.6656	0.385934		13.6656	0.409418
13.6728	0.401151		13.6728	1.27129		13.6728	0.385982		13.6728	0.409585
13.68	0.401104		13.68	1.2709		13.68	0.386047		13.68	0.40977
13.6872	0.401068		13.6872	1.27045		13.6872	0.386113		13.6872	0.409955
13.6944	0.401038		13.6944	1.26998		13.6944	0.386178		13.6944	0.41014
13.7016	0.400996		13.7016	1.2695		13.7016	0.386238		13.7016	0.410318
13.7088	0.400943		13.7088	1.269		13.7088	0.38628		13.7088	0.410479
13.716	0.400865		13.716	1.26852		13.716	0.386298		13.716	0.410628
13.7232	0.400776		13.7232	1.26807		13.7232	0.386304		13.7232	0.410759
13.7304	0.400668		13.7304	1.26765		13.7304	0.386316		13.7304	0.410873
13.7376	0.400537		13.7376	1.26727		13.7376	0.386357		13.7376	0.410986
13.7448	0.400376		13.7448	1.26694		13.7448	0.386441		13.7448	0.411123
13.752	0.400209		13.752	1.26665		13.752	0.386578		13.752	0.411284
13.7592	0.400025		13.7592	1.2664		13.7592	0.386763		13.7592	0.411522
13.7664	0.399834		13.7664	1.26619		13.7664	0.386959		13.7664	0.411826
13.7736	0.399649		13.7736	1.26603		13.7736	0.387132		13.7736	0.412214
13.7808	0.399488		13.7808	1.26589		13.7808	0.387263		13.7808	0.412679
13.788	0.399333		13.788	1.2658		13.788	0.387305		13.788	0.413203
13.7952	0.399202		13.7952	1.26573		13.7952	0.387275		13.7952	0.413764
13.8024	0.399089		13.8024	1.26569		13.8024	0.387186		13.8024	0.414354
13.8096	0.398982		13.8096	1.26564		13.8096	0.387055		13.8096	0.414938
13.8168	0.398874		13.8168	1.26561		13.8168	0.386912		13.8168	0.415498
13.824	0.398761		13.824	1.26556		13.824	0.386804		13.824	0.416029
13.8312	0.398618		13.8312	1.26548		13.8312	0.386739		13.8312	0.416511
13.8384	0.398439		13.8384	1.26537		13.8384	0.386721		13.8384	0.416952
13.8456	0.398236		13.8456	1.26521		13.8456	0.386739		13.8456	0.417352
13.8528	0.39801		13.8528	1.26503		13.8528	0.386769		13.8528	0.417703
13.86	0.397772		13.86	1.2648		13.86	0.386786		13.86	0.418007
13.8672	0.397527		13.8672	1.26455		13.8672	0.386775		13.8672	0.418287
13.8744	0.397283		13.8744	1.26429		13.8744	0.386739		13.8744	0.418538
13.8816	0.397056		13.8816	1.26404		13.8816	0.386697		13.8816	0.4188
13.8888	0.396836		13.8888	1.26379		13.8888	0.386673		13.8888	0.41908
13.896	0.396645		13.896	1.26357		13.896	0.386691		13.896	0.419396
13.9032	0.396472		13.9032	1.26336		13.9032	0.386757		13.9032	0.41976
13.9104	0.396335		13.9104	1.26315		13.9104	0.386888		13.9104	0.420183
13.9176	0.396228		13.9176	1.26294		13.9176	0.387049		13.9176	0.420654
13.9248	0.396156		13.9248	1.26272		13.9248	0.387245		13.9248	0.421154
13.932	0.396109		13.932	1.26249		13.932	0.387442		13.932	0.421673
13.9392	0.396091		13.9392	1.26223		13.9392	0.387621		13.9392	0.422192
13.9464	0.396103		13.9464	1.26194		13.9464	0.387776		13.9464	0.42268
13.9536	0.396115		13.9536	1.26163		13.9536	0.387907		13.9536	0.423127
13.9608	0.396126		13.9608	1.26131		13.9608	0.38802		13.9608	0.423545
13.968	0.396097		13.968	1.26101		13.968	0.388145		13.968	0.423932
13.9752	0.396025		13.9752	1.26073		13.9752	0.3883		13.9752	0.424296
13.9824	0.395918		13.9824	1.26051		13.9824	0.388485		13.9824	0.424659
13.9896	0.395781		13.9896	1.26033		13.9896	0.388706		13.9896	0.425035
13.9968	0.395626		13.9968	1.2602		13.9968	0.388914		13.9968	0.425446
14.004	0.395453		14.004	1.26012		14.004	0.389105		14.004	0.425899
14.0112	0.395274		14.0112	1.26008		14.0112	0.389236		14.0112	0.426424
14.0184	0.395083		14.0184	1.26007		14.0184	0.389302		14.0184	0.427014
14.0256	0.394875		14.0256	1.26008		14.0256	0.389284		14.0256	0.427675
14.0328	0.394672		14.0328	1.26007		14.0328	0.389183		14.0328	0.428385
14.04	0.394434		14.04	1.26004		14.04	0.389039		14.04	0.429112
14.0472	0.394172		14.0472	1.25995		14.0472	0.388885		14.0472	0.429839
14.0544	0.393885		14.0544	1.25981		14.0544	0.388765		14.0544	0.430524
14.0616	0.393587		14.0616	1.25959		14.0616	0.388724		14.0616	0.431162
14.0688	0.393295		14.0688	1.25928		14.0688	0.388777		14.0688	0.431734
14.076	0.393033		14.076	1.25889		14.076	0.388926		14.076	0.432241
14.0832	0.392807		14.0832	1.25844		14.0832	0.389159		14.0832	0.432694
14.0904	0.392616		14.0904	1.25795		14.0904	0.389451		14.0904	0.433117
14.0976	0.392467		14.0976	1.25747		14.0976	0.389749		14.0976	0.43354
14.1048	0.392324		14.1048	1.25703		14.1048	0.390029		14.1048	0.433993
14.112	0.392187		14.112	1.25665		14.112	0.390226		14.112	0.4345
14.1192	0.392032		14.1192	1.25637		14.1192	0.390327		14.1192	0.435036
14.1264	0.391865		14.1264	1.25617		14.1264	0.390309		14.1264	0.435591
14.1336	0.391674		14.1336	1.25604		14.1336	0.390202		14.1336	0.436127
14.1408	0.391477		14.1408	1.25594		14.1408	0.390041		14.1408	0.43661
14.148	0.391298		14.148	1.25585		14.148	0.389856		14.148	0.437009
14.1552	0.391138		14.1552	1.25574		14.1552	0.389677		14.1552	0.437289
14.1624	0.39103		14.1624	1.2556		14.1624	0.389534		14.1624	0.437456
14.1696	0.390965		14.1696	1.25542		14.1696	0.389445		14.1696	0.437498
14.1768	0.390947		14.1768	1.25524		14.1768	0.389403		14.1768	0.437474
14.184	0.390953		14.184	1.25507		14.184	0.389385		14.184	0.437427
14.1912	0.390977		14.1912	1.25493		14.1912	0.389355		14.1912	0.437427
14.1984	0.391006		14.1984	1.25487		14.1984	0.389284		14.1984	0.437504
14.2056	0.391024		14.2056	1.25488		14.2056	0.389159		14.2056	0.437689
14.2128	0.391036		14.2128	1.25495		14.2128	0.388962		14.2128	0.437981
14.22	0.391024		14.22	1.25503		14.22	0.388736		14.22	0.438356
14.2272	0.390983		14.2272	1.25508		14.2272	0.388497		14.2272	0.438803
14.2344	0.390911		14.2344	1.25508		14.2344	0.388294		14.2344	0.439274
14.2416	0.39081		14.2416	1.25498		14.2416	0.388151		14.2416	0.439709
14.2488	0.390691		14.2488	1.25477		14.2488	0.388086		14.2488	0.440061
14.256	0.390553		14.256	1.25445		14.256	0.38811		14.256	0.440311
14.2632	0.390428		14.2632	1.25405		14.2632	0.388199		14.2632	0.440455
14.2704	0.390321		14.2704	1.2536		14.2704	0.388312		14.2704	0.440496
14.2776	0.390267		14.2776	1.25315		14.2776	0.388402		14.2776	0.440437
14.2848	0.390261		14.2848	1.25275		14.2848	0.388437		14.2848	0.440294
14.292	0.390297		14.292	1.25246		14.292	0.388378		14.292	0.440073
14.2992	0.390375		14.2992	1.25229		14.2992	0.388235		14.2992	0.439787
14.3064	0.390458		14.3064	1.25225		14.3064	0.38802		14.3064	0.439453
14.3136	0.39053		14.3136	1.25229		14.3136	0.387752		14.3136	0.439096
14.3208	0.390547		14.3208	1.25239		14.3208	0.387466		14.3208	0.438708
14.328	0.390512		14.328	1.25253		14.328	0.387204		14.328	0.438315
14.3352	0.390398		14.3352	1.25265		14.3352	0.386983		14.3352	0.437927
14.3424	0.390238		14.3424	1.25272		14.3424	0.386804		14.3424	0.437534
14.3496	0.390035		14.3496	1.25273		14.3496	0.386655		14.3496	0.437146
14.3568	0.38982		14.3568	1.25266		14.3568	0.386512		14.3568	0.436753
14.364	0.389618		14.364	1.25255		14.364	0.386369		14.364	0.436348
14.3712	0.389445		14.3712	1.25241		14.3712	0.386184		14.3712	0.435924
14.3784	0.389308		14.3784	1.25228		14.3784	0.385952		14.3784	0.435507
[truncated: 780 more rows]

## Sheet: Fig.1C Thermal denaturation
Temperature [°C]	WT 1	WT 2	WT 3	N439K 1	N439K 2	N439K 3	N501Y 1	N501Y 2	N501Y 3
35.216							-0.000269065	-0.000256081	-8.40649e-05
35.245	-0.00123115	1.19929e-05	-0.000429151	-0.000323252	-0.000805006	-0.000205084
35.364	-0.00120182	-2.22849e-05	-0.000438427	-0.000329532	-0.000795354	-0.000218704
35.394							-0.000308817	-0.000291695	-0.000135878
35.484	-0.0011725	-5.58999e-05	-0.000448188	-0.000335271	-0.000785441	-0.000231729
35.514							-0.000335006	-0.000315013	-0.000170235
35.573	-0.00115094	-8.01823e-05	-0.000455675	-0.000339111	-0.00077797	-0.000240902
35.599							-0.000353308	-0.000331246	-0.000194379
35.696	-0.00112138	-0.000112865	-0.00046637	-0.000343798	-0.000767458	-0.000252879
35.722							-0.0003794	-0.000354304	-0.00022902
35.782	-0.00110103	-0.000134955	-0.000474004	-0.000346629	-0.000760051	-0.00026072
35.842							-0.000404424	-0.000376345	-0.000262537
35.905	-0.00107216	-0.000165697	-0.000485193	-0.000349997	-0.000749263	-0.000271207
35.961							-0.000428669	-0.000397647	-0.00029532
35.995	-0.0010511	-0.00018766	-0.000493585	-0.00035192	-0.00074118	-0.000278346
36.051							-0.000446589	-0.000413375	-0.00031978
36.08	-0.00103145	-0.000207841	-0.000501569	-0.000353313	-0.00073348	-0.000284637
36.17	-0.00101076	-0.000228754	-0.000510102	-0.00035432	-0.000725205	-0.000290847
36.17							-0.000469767	-0.000433725	-0.000351761
36.289	-0.000983539	-0.000255775	-0.000521462	-0.000354886	-0.000714048	-0.000298359
36.289							-0.000492315	-0.000453569	-0.0003833
36.382	-0.000962399	-0.0002764	-0.000530329	-0.00035472	-0.000705185	-0.000303685
36.409							-0.00051435	-0.000473059	-0.000414605
36.442	-0.000948764	-0.000289546	-0.000536044	-0.000354322	-0.000699379	-0.000306883
36.468							-0.000524912	-0.000482454	-0.000429798
36.591	-0.000914903	-0.000321716	-0.000550124	-0.000352362	-0.000684683	-0.000314055
36.617							-0.000550811	-0.000505706	-0.00046764
36.677	-0.000895333	-0.000340043	-0.000558134	-0.000350621	-0.000676035	-0.00031773
36.677							-0.000560912	-0.000514878	-0.000482638
36.77	-0.000874155	-0.000359698	-0.000566648	-0.00034827	-0.000666574	-0.000321357
36.796							-0.000580369	-0.000532753	-0.000511926
36.856	-0.000854386	-0.00037789	-0.00057441	-0.000345657	-0.000657663	-0.000324427
36.916							-0.000599296	-0.000550452	-0.000540913
36.979	-0.000825925	-0.000403908	-0.00058521	-0.000341275	-0.000644744	-0.000328402
37.009							-0.000613501	-0.000563974	-0.000562968
37.065	-0.00080582	-0.000422206	-0.000592525	-0.000337792	-0.000635582	-0.000330935
37.125							-0.000630681	-0.000580645	-0.000589934
37.154	-0.000784775	-0.000441326	-0.000599868	-0.000333856	-0.000625983	-0.000333383
37.214							-0.000643525	-0.000593369	-0.000610256
37.244	-0.000763266	-0.000460888	-0.000607006	-0.000329584	-0.000616191	-0.000335715
37.334							-0.000660423	-0.0006105	-0.0006371
37.363	-0.000734391	-0.000487243	-0.000615957	-0.000323552	-0.000603119	-0.000338631
37.423							-0.0006727	-0.000623261	-0.000656595
37.453	-0.000712228	-0.000507606	-0.000622305	-0.000318786	-0.000593183	-0.000340756
37.513	-0.000697279	-0.000521422	-0.000626324	-0.000315545	-0.000586547	-0.000342149
37.513							-0.000684968	-0.000636296	-0.000675975
37.632							-0.00070106	-0.000653838	-0.000701084
37.662	-0.000659601	-0.000556591	-0.00063553	-0.000307478	-0.000570138	-0.000345592
37.692							-0.000709177	-0.000662867	-0.000713546
37.751	-0.000636716	-0.000578179	-0.000640537	-0.000302785	-0.000560447	-0.00034765
37.841	-0.000613339	-0.000600362	-0.000645299	-0.000298275	-0.000550806	-0.000349717
37.871							-0.000733703	-0.00069069	-0.000749972
37.93	-0.000590071	-0.000622452	-0.000649844	-0.000294155	-0.000541489	-0.000351667
37.93							-0.000741992	-0.00070019	-0.00076177
38.05	-0.000558743	-0.000651753	-0.000656143	-0.000289227	-0.000529355	-0.000353765
38.05							-0.000759338	-0.000719988	-0.000785462
38.139	-0.000535929	-0.000672118	-0.000661439	-0.000285921	-0.000520697	-0.000354302
38.169							-0.000777277	-0.000740005	-0.000808458
38.229	-0.000513786	-0.000690108	-0.000667906	-0.000282476	-0.000512198	-0.000352972
38.259							-0.000791221	-0.000754969	-0.000825283
38.322	-0.000496493	-0.000700174	-0.00066933	-0.000273073	-0.000500144	-0.000338248
38.348							-0.000804991	-0.000769019	-0.000841073
38.438	-0.000481005	-0.000704578	-0.000667933	-0.000258649	-0.00048178	-0.000310869
38.468							-0.000811699	-0.000781258	-0.000848837
38.527	-0.000470441	-0.000705041	-0.000669813	-0.000248764	-0.000467978	-0.00029043
38.561							-0.000809185	-0.000787978	-0.000848807
38.617	-0.000464222	-0.000699527	-0.000669343	-0.000236962	-0.000450942	-0.000264124
38.677							-0.00081102	-0.000797714	-0.000855479
38.706	-0.000458928	-0.000691313	-0.000671814	-0.000225415	-0.000434491	-0.000238325
38.766							-0.000804274	-0.000804124	-0.000857223
38.796	-0.00045764	-0.00067723	-0.000671372	-0.000212023	-0.0004139	-0.000207476
38.856							-0.000803282	-0.000810233	-0.000863779
38.916	-0.000458069	-0.000653014	-0.000671416	-0.000192739	-0.000384026	-0.000164476
38.975							-0.000796765	-0.0008168	-0.000871791
39.065	-0.000461017	-0.000614225	-0.000666096	-0.000166681	-0.000338374	-0.000108006
39.065							-0.000787614	-0.000821385	-0.000877969
39.158	-0.000461648	-0.000588222	-0.000664432	-0.000148485	-0.00030937	-7.36448e-05
39.184							-0.00077032	-0.00082823	-0.000887501
39.244	-0.000461291	-0.000563084	-0.000662121	-0.000130342	-0.000280922	-4.23788e-05
39.274							-0.000759258	-0.000829801	-0.000895251
39.304	-0.000461312	-0.000545391	-0.000663474	-0.000115482	-0.00026261	-1.98784e-05
39.397							-0.000739027	-0.000832729	-0.000906758
39.423	-0.000456043	-0.000510083	-0.000654922	-8.84336e-05	-0.000217585	1.95422e-05
39.483							-0.000724333	-0.00083126	-0.00091372
39.542	-0.000447052	-0.000476652	-0.000645729	-5.90253e-05	-0.000171687	5.57637e-05
39.572							-0.000707708	-0.000832048	-0.000922703
39.602	-0.000443599	-0.00045975	-0.000645361	-4.06535e-05	-0.000150321	7.67381e-05
39.696							-0.00068368	-0.000827041	-0.000931883
39.722	-0.000426468	-0.000431277	-0.000629279	-1.0545e-05	-0.000100382	0.000105606
39.755							-0.00067223	-0.000823836	-0.000935964
39.841	-0.000405667	-0.000407181	-0.000611307	2.04606e-05	-5.04616e-05	0.000131514
39.901							-0.000645308	-0.000810925	-0.000944234
39.931	-0.000388477	-0.00039143	-0.000597169	4.5295e-05	-1.27772e-05	0.000151239
39.991							-0.000626196	-0.000801855	-0.000945823
40.02	-0.000371412	-0.000377712	-0.000583705	7.29061e-05	2.39168e-05	0.000173305
40.11							-0.000602594	-0.000785345	-0.00094565
40.14	-0.000343109	-0.000364886	-0.000556663	0.000103968	7.59386e-05	0.000195928
40.2							-0.000583823	-0.000771735	-0.000942588
40.233	-0.000321441	-0.000357529	-0.000534536	0.000129792	0.000116037	0.0002161
40.289							-0.000564651	-0.000757165	-0.000936966
40.319	-0.000301151	-0.000353437	-0.000511913	0.000155533	0.000152368	0.000236888
40.379	-0.000286328	-0.000352642	-0.000493846	0.000173743	0.000177148	0.000251981
40.412							-0.000536699	-0.000736565	-0.000924796
40.502	-0.000259524	-0.000348997	-0.000456382	0.0002057	0.000232845	0.000283571
40.528							-0.000508719	-0.00071689	-0.000908619
40.588							-0.000493656	-0.000707948	-0.000898792
40.618	-0.000240295	-0.000343624	-0.000420411	0.000238461	0.000289614	0.000320904
40.708							-0.000462512	-0.000689636	-0.000875762
40.767	-0.000211338	-0.000343904	-0.000365325	0.000279387	0.000355473	0.000371063
40.797							-0.000438028	-0.0006736	-0.000854658
40.857	-0.000199529	-0.000339658	-0.000333011	0.000305322	0.000399558	0.000407031
40.887	-0.000195862	-0.000338005	-0.00032206	0.000313824	0.000414271	0.000419499
40.917							-0.000407478	-0.000663482	-0.000829717
41.036	-0.000180856	-0.000326016	-0.000267982	0.000355108	0.000488704	0.000485198
41.04							-0.000373698	-0.000644337	-0.000796266
41.1	-0.000179907	-0.000315403	-0.000246459	0.000381915	0.000526988	0.000520189
41.1							-0.000358676	-0.000637966	-0.00078241
41.189	-0.000176306	-0.000301244	-0.00021574	0.000413856	0.00057703	0.000566897
41.215							-0.000329191	-0.000621978	-0.000752373
41.305							-0.00030679	-0.000608574	-0.000728895
41.335	-0.000172613	-0.000271768	-0.000166949	0.000481533	0.000666289	0.000652394
41.398							-0.000284341	-0.000593647	-0.000704959
41.484	-0.000169634	-0.000235776	-0.000120441	0.000541533	0.00075656	0.000735035
41.514							-0.000257612	-0.000573638	-0.000677253
41.574	-0.000165545	-0.000212	-9.37024e-05	0.000590672	0.000815961	0.000789722
41.604							-0.000237634	-0.000556567	-0.000656944
41.634	-0.000157134	-0.000197884	-7.62251e-05	0.000635345	0.000858263	0.000831078
41.723	-0.000143865	-0.000175625	-5.19336e-05	0.000697601	0.000920689	0.000889137
41.724							-0.000211728	-0.00053108	-0.000630471
41.813	-0.000135515	-0.00014895	-2.89421e-05	0.000749941	0.000983019	0.000940429
41.813							-0.000193062	-0.000510307	-0.000611801
41.903	-0.000125208	-0.000121737	-7.13881e-06	0.000805875	0.00104708	0.000990472
41.933							-0.000167517	-0.000477547	-0.000583127
42.022	-9.71843e-05	-9.07234e-05	2.02657e-05	0.000899589	0.0011358	0.00106293
42.026							-0.000149057	-0.000452525	-0.000566651
42.082							-0.000138402	-0.000437478	-0.000558895
42.112	-7.17571e-05	-6.79381e-05	3.99449e-05	0.000975228	0.00120442	0.00111702
42.205	-4.08494e-05	-4.55228e-05	5.96548e-05	0.00105916	0.0012768	0.00117343
42.235							-0.000105098	-0.000384048	-0.000518657
42.291	-9.22551e-06	-2.54932e-05	7.75626e-05	0.00114083	0.00134485	0.00122579
42.325							-8.50443e-05	-0.000350365	-0.000494668
42.381	2.9498e-05	-5.40684e-06	9.67563e-05	0.00123774	0.00141951	0.00128594
42.445							-5.73711e-05	-0.000303898	-0.000463454
42.504	7.90807e-05	2.30529e-05	0.000122875	0.00136613	0.00152166	0.00136392
42.53							-3.50547e-05	-0.000263609	-0.000428371
42.59							-1.97865e-05	-0.000238187	-0.00041069
42.594	0.000115481	4.20815e-05	0.000141961	0.00145696	0.00159487	0.00141854
42.683	0.000151964	6.41821e-05	0.000162519	0.00156258	0.00167604	0.00148388
42.71							1.42197e-05	-0.000179134	-0.000360059
42.769	0.000188006	8.074e-05	0.000182253	0.00165476	0.00174835	0.00154117
42.799							4.26691e-05	-0.000130172	-0.000312529
42.919	0.000245989	0.000117078	0.00021964	0.00183478	0.00189067	0.00166088
42.919							8.14996e-05	-6.56463e-05	-0.000251872
43.009							0.000113968	-1.38632e-05	-0.000198427
43.039	0.000292465	0.000142335	0.000251908	0.0019778	0.00200397	0.00176122
43.102							0.000147842	4.03104e-05	-0.000141061
43.132	0.000324774	0.000166993	0.000278226	0.00209453	0.00210107	0.00185007
43.188							0.00018306	9.20946e-05	-8.20723e-05
43.222	0.00035336	0.000199711	0.000304416	0.00221239	0.00220875	0.00195081
43.308							0.000239561	0.000165024	6.27911e-06
43.311	0.000383087	0.000233452	0.000332175	0.00232838	0.00231916	0.00205786
43.368	0.00040219	0.000248324	0.000350789	0.00240024	0.00238127	0.00211993
43.427							0.000297013	0.00023718	9.66431e-05
43.487	0.000444255	0.000298467	0.000392451	0.00255651	0.00253869	0.00228009
43.487							0.00032083	0.000273059	0.000143042
43.607	0.000487805	0.000348538	0.000437785	0.00271474	0.00269755	0.00244662
43.607							0.00039459	0.000346153	0.000239142
43.696							0.000442248	0.000398307	0.000310721
43.726	0.00053044	0.00039942	0.000484751	0.00287435	0.0028562	0.00261652
43.79							0.000501355	0.000454441	0.000386215
43.816	0.000566345	0.000443972	0.000523421	0.00299826	0.00298426	0.00275577
43.906	0.000606367	0.000493157	0.000565361	0.00312542	0.00311832	0.00290291
43.906							0.00057767	0.00052321	0.000478419
43.969	0.000642766	0.000535076	0.000600982	0.00321847	0.00322339	0.0030183
44.025							0.00066186	0.000594573	0.000571038
44.055	0.000681569	0.000582979	0.000641564	0.00334478	0.00335023	0.00315909
44.115							0.000735365	0.000655316	0.000639406
44.175							0.000773255	0.000684104	0.000684034
44.209	0.000782768	0.000696321	0.000738153	0.0035919	0.00361682	0.00345149
44.298							0.000880765	0.000771185	0.000773873
44.328	0.000849068	0.000773181	0.000799472	0.00378087	0.00380244	0.00365716
44.384							0.000954013	0.00082943	0.00083515
44.418	0.000914199	0.000844205	0.000856767	0.00393568	0.00396013	0.00382843
44.478	0.000950214	0.00088309	0.000885589	0.00403263	0.00405285	0.00392993
44.534							0.001092	0.000942086	0.000940765
44.594							0.00114824	0.000989064	0.000982823
44.624	0.00107978	0.00101972	0.000994315	0.00430747	0.00433249	0.00422574
44.657							0.00120874	0.0010407	0.00102733
44.717	0.00117691	0.00112339	0.00107669	0.00450047	0.00452677	0.00442834
44.777							0.00132094	0.00114042	0.00111207
44.833	0.00128604	0.00123568	0.00116279	0.00472556	0.00474834	0.00465655
44.893	0.0013525	0.00130578	0.00121823	0.00485421	0.0048755	0.00478688
44.893							0.00143881	0.00125034	0.00119863
44.953	0.0014103	0.00136379	0.00126224	0.00497025	0.00499023	0.00490183
45.016							0.00157821	0.00138328	0.00130127
45.072	0.00154092	0.0014987	0.00136897	0.00522094	0.00523924	0.00515157
45.102							0.00168113	0.00148337	0.00138065
45.162							0.00173482	0.00154365	0.00142566
45.192	0.00167798	0.00164039	0.00148443	0.00548025	0.00549887	0.00541017
45.282							0.00187599	0.0016891	0.00154074
45.312	0.00181867	0.0017859	0.00160758	0.00574529	0.00576712	0.00567632
45.371							0.00198493	0.00180181	0.00163177
45.372	0.00189386	0.00186376	0.00167866	0.00588672	0.00591026	0.00581987
45.461							0.00209418	0.0019163	0.00172308
45.465	0.00200522	0.00197868	0.00178215	0.00609817	0.00612802	0.0060354
45.581							0.00226839	0.00208542	0.00187601
45.614	0.00217923	0.00216106	0.00194603	0.00643265	0.0064804	0.00638232
45.701	0.00228581	0.00227272	0.00205335	0.00663932	0.00669915	0.00659944
45.701							0.00244022	0.00225134	0.00202431
45.79							0.0025744	0.00237612	0.00213928
45.794	0.00239993	0.0023934	0.00217057	0.00686244	0.00693796	0.0068364
45.85							0.00266395	0.00245709	0.00221389
45.884	0.00250477	0.00250972	0.0022798	0.00707172	0.00716748	0.00706446
45.97							0.00285794	0.00262633	0.00237658
45.974	0.00262948	0.00263646	0.00241343	0.00731164	0.00742237	0.00731773
46.06	0.0027343	0.00275421	0.00252778	0.00752106	0.00765399	0.0075497
46.09							0.00306877	0.00280424	0.0025506
46.149	0.00285767	0.00288436	0.00266115	0.00775802	0.00791028	0.00780531
46.179							0.0032287	0.00293504	0.00267866
46.269							0.00338847	0.0030627	0.00280447
46.273	0.0030462	0.00307702	0.00285966	0.00810736	0.00828305	0.00817503
46.359							0.00355375	0.00319365	0.00293257
46.419	0.0032737	0.00331251	0.00309815	0.00852236	0.00872541	0.00861724
46.449							0.00373912	0.00334025	0.00307057
46.509	0.00342526	0.00346596	0.00325288	0.00878981	0.00900532	0.00889703
46.568	0.00353445	0.0035736	0.00336039	0.00897602	0.00919528	0.00908497
46.598							0.00405426	0.00358831	0.00329703
46.662							0.00418358	0.00369092	0.00338956
46.688	0.00375031	0.00378954	0.00357689	0.00934592	0.00957373	0.00946616
46.748							0.0043715	0.00384088	0.00351951
46.782	0.00392067	0.00395779	0.0037475	0.00963486	0.00986765	0.00976657
46.838							0.00456544	0.00399746	0.00365258
46.868	0.00409019	0.00412193	0.00391243	0.0099145	0.0101441	0.0100464
46.928							0.00479029	0.00418264	0.00380211
46.958	0.00427472	0.00429919	0.00409021	0.0102145	0.0104358	0.0103415
47.047							0.00505403	0.00440165	0.00398044
47.107	0.00459505	0.00460605	0.004397	0.0107268	0.0109235	0.0108336
47.137							0.00528093	0.00459722	0.00413489
47.201	0.00480247	0.0048032	0.0045946	0.0110543	0.0112309	0.0111442
47.227							0.00550301	0.00479145	0.00428929
47.321	0.00507223	0.00505755	0.0048499	0.0114769	0.011623	0.0115394
47.347							0.00580431	0.00506118	0.00450586
47.377	0.00520774	0.00519308	0.00498339	0.011685	0.0118118	0.0117267
47.466	0.0054188	0.00539918	0.00518822	0.012009	0.0121067	0.0120205
47.47							0.00611315	0.00534221	0.0047357
47.526							0.00625909	0.0054788	0.00484977
47.53	0.0055736	0.00555271	0.00534028	0.0122439	0.0123193	0.0122316
47.646							0.00658996	0.00579938	0.00512857
47.65	0.00586149	0.00583852	0.00562359	0.0126841	0.012716	0.0126231
47.736							0.00682401	0.00602207	0.00532329
47.796							0.0069901	0.00618471	0.00547139
47.8	0.0062482	0.00623924	0.00601588	0.0132363	0.0132168	0.0131192
47.89	0.00646131	0.00645702	0.00623102	0.0135698	0.0135146	0.0134068
47.946							0.00739663	0.0065799	0.00583334
47.979	0.00669897	0.00670791	0.00647487	0.0138916	0.0138107	0.0137013
48.036							0.00765447	0.0068344	0.00607608
48.065	0.00692361	0.00694499	0.00670538	0.0142018	0.0140963	0.0139828
48.129							0.00793368	0.00711198	0.00634805
48.155	0.00716724	0.0072036	0.00695502	0.0145194	0.0143944	0.0142794
48.245	0.00740095	0.00745063	0.00719473	0.0148409	0.0146948	0.0145733
48.249							0.00829112	0.00746375	0.00669164
48.335							0.00855264	0.00772035	0.00694358
48.369	0.00773736	0.00780647	0.00753711	0.0152718	0.0151081	0.0149819
48.395							0.00874056	0.00790497	0.00712561
48.515							0.00911126	0.0082649	0.00747873
48.518	0.0081523	0.00824236	0.00795432	0.0157773	0.0156056	0.0154747
48.578	0.00833971	0.00844021	0.00813842	0.0159611	0.0157985	0.0156702
48.604							0.00940978	0.00855831	0.00776631
48.668	0.00858526	0.0086925	0.0083825	0.0162697	0.0161055	0.0159704
48.724							0.00980144	0.00893702	0.00813514
48.758	0.00885244	0.00896795	0.00864342	0.0165572	0.0164042	0.0162659
48.818							0.0101331	0.00926054	0.00844545
48.848	0.00912416	0.00924638	0.00890689	0.0168402	0.0167019	0.0165595
48.904	0.00929033	0.0094152	0.00906855	0.0170201	0.0168902	0.016745
48.904							0.0104259	0.00954175	0.00871501
49.024							0.0108559	0.00995447	0.00910553
49.057	0.00978581	0.00992084	0.00954038	0.0174659	0.0173744	0.0172172
49.113							0.0111868	0.0102699	0.00940159
49.173	0.0101633	0.0103038	0.00990062	0.0178052	0.0177392	0.0175715
49.203							0.0115244	0.0105887	0.00969949
49.263	0.010463	0.0106077	0.0101863	0.0180632	0.0180152	0.0178385
49.293							0.0118734	0.0109149	0.0100042
49.353	0.010764	0.0109138	0.0104745	0.0183226	0.0182893	0.0181041
49.413							0.0123525	0.0113559	0.010419
49.443	0.0110572	0.0112159	0.0107584	0.0185974	0.018574	0.0183822
49.503							0.0127	0.0116766	0.010713
49.567	0.0115043	0.0116699	0.0111832	0.0189222	0.0189103	0.0187052
49.593							0.0130805	0.0120157	0.0110427
49.653	0.0118228	0.0119921	0.0114865	0.0191374	0.0191275	0.018914
49.713							0.0135739	0.0124582	0.0114659
49.776	0.0122675	0.0124489	0.0119121	0.0194672	0.0194544	0.0192321
49.776							0.0138296	0.0126905	0.0116846
49.836	0.0124911	0.0126773	0.0121256	0.0196186	0.019602	0.0193756
49.922	0.0128176	0.0130092	0.0124368	0.0198257	0.0198013	0.019569
49.923							0.0144525	0.0132381	0.0122336
49.982							0.0146898	0.0134595	0.0124417
50.102	0.0135091	0.0137118	0.0130955	0.0202442	0.0201988	0.0199565
50.102							0.0151944	0.0139109	0.0128982
50.166	0.0137683	0.0139659	0.0133422	0.0203564	0.0203024	0.0200522
50.192							0.0155696	0.014253	0.0132433
50.252	0.0141077	0.0143053	0.0136657	0.0205271	0.0204627	0.0202061
50.282							0.0159406	0.0145997	0.013592
50.342	0.0144631	0.0146608	0.0140054	0.0207014	0.0206273	0.0203654
50.402							0.0164399	0.015065	0.014067
50.436	0.014845	0.0150309	0.0143702	0.0208292	0.0207473	0.0204708
50.462							0.0166905	0.0152993	0.0143063
50.556	0.0153263	0.0155006	0.0148324	0.0209936	0.0209057	0.020615
50.586							0.0172078	0.0157884	0.0148038
50.645							0.0174541	0.0160229	0.0150418
50.672	0.0157884	0.0159511	0.015279	0.0211435	0.0210541	0.0207522
50.765							0.0179603	0.0165013	0.015518
50.791	0.0162665	0.0164074	0.0157398	0.0212213	0.0211352	0.0208161
50.852							0.0183249	0.0168496	0.0158706
50.881	0.0166252	0.0167496	0.0160865	0.0212708	0.0211898	0.0208616
50.911	0.0167427	0.0168642	0.0162017	0.021312	0.0212339	0.0209039
50.971							0.0188285	0.0173245	0.0163438
51.035	0.0172357	0.0173294	0.0166763	0.0213245	0.0212566	0.0209181
51.065							0.0192278	0.0176968	0.0167115
51.125	0.017591	0.0176647	0.017018	0.0213277	0.0212692	0.0209283
51.155							0.0196115	0.0180508	0.0170656
51.275							0.0201176	0.0185108	0.017512
51.305	0.0182948	0.0183256	0.0176913	0.0212711	0.021232	0.0208976
51.365							0.0204892	0.0188446	0.0178368
51.391	0.0186306	0.0186412	0.0180096	0.0212496	0.0212234	0.02089
51.451	0.0188509	0.0188461	0.0182229	0.0211511	0.0211235	0.0208113
51.451							0.0208527	0.0191664	0.0181576
51.541	0.0192014	0.0191752	0.0185519	0.0211221	0.0211098	0.0207972
51.571							0.0213293	0.0195864	0.0185698
51.661							0.0216973	0.019905	0.0188846
51.691	0.0197321	0.0196734	0.0190695	0.0208833	0.0208688	0.0206086
51.751							0.022046	0.0202071	0.0191808
51.755	0.0199736	0.0198998	0.0192972	0.0208322	0.0208248	0.0205697
51.814	0.0201815	0.0200954	0.0194993	0.0207482	0.0207414	0.0205019
51.844							0.0223879	0.0205042	0.0194708
51.931							0.0226996	0.0207752	0.019733
51.934	0.0205693	0.0204631	0.0198917	0.0205197	0.0205063	0.0203144
52.054	0.0209465	0.0208208	0.0202779	0.0202927	0.0202739	0.020124
52.054							0.0231148	0.0211393	0.0200816
52.114							0.0232826	0.0212922	0.0202271
52.171	0.0212938	0.0211504	0.020643	0.0200514	0.0200256	0.0199175
52.234							0.023669	0.0216335	0.020547
52.26	0.021543	0.0213867	0.0209121	0.0198525	0.0198202	0.0197447
52.32							0.0239091	0.0218519	0.0207503
52.354	0.0217863	0.0216175	0.0211838	0.0196223	0.0195826	0.0195428
52.414							0.024154	0.0220775	0.0209599
52.44	0.0220004	0.0218194	0.0214263	0.0194039	0.019357	0.0193487
52.534	0.022242	0.0220451	0.0216969	0.0191719	0.0191141	0.0191369
52.56							0.0244464	0.0223608	0.0212232
52.624	0.0224385	0.0222289	0.0219301	0.0189155	0.0188493	0.0189044
52.624							0.0246033	0.0225065	0.0213619
52.714							0.0247605	0.0226619	0.0215117
52.744	0.0226672	0.0224415	0.0222119	0.0185446	0.0184695	0.0185659
52.804							0.0248945	0.0227984	0.021647
52.834	0.022827	0.022589	0.0224106	0.0182567	0.0181746	0.0182994
52.924							0.0250333	0.022947	0.0218013
52.954	0.0229442	0.0226953	0.0225847	0.0178104	0.0177306	0.0178852
53.01							0.0251092	0.0230332	0.0218967
53.07	0.0231606	0.0228944	0.0228433	0.0174392	0.0173442	0.0175317
53.13	0.0232662	0.0229923	0.0229716	0.0172378	0.017135	0.0173411
53.134							0.0251762	0.0231209	0.0220043
53.19							0.0251508	0.0231107	0.0220096
53.254	0.0233502	0.0230686	0.0231029	0.0167557	0.0166541	0.0168798
53.31							0.0252338	0.0232144	0.0221302
53.37	0.023424	0.0231378	0.0232172	0.0163031	0.0162012	0.0164439
53.4							0.025167	0.0231734	0.022118
53.434	0.023424	0.0231386	0.0232364	0.0160417	0.0159437	0.0161866
53.494							0.0251703	0.0232025	0.0221615
53.55	0.0234774	0.0231927	0.0233282	0.015579	0.0154823	0.0157425
53.58							0.025052	0.0231102	0.0221032
53.614	0.0234864	0.0232044	0.0233572	0.0153169	0.0152231	0.0154902
53.7							0.0249409	0.0230374	0.0220611
53.704	0.0234991	0.0232217	0.0233993	0.0149433	0.0148548	0.0151359
53.794							0.0248064	0.0229336	0.0219867
53.85	0.023396	0.0231368	0.0233337	0.0143259	0.014252	0.0145291
53.884							0.0246257	0.0227813	0.0218698
53.944	0.0233152	0.0230693	0.0232779	0.0139266	0.0138616	0.0141404
53.974							0.0245044	0.022693	0.0218012
54.034	0.0231933	0.0229631	0.0231774	0.0135491	0.0134898	0.0137649
54.064							0.0243211	0.0225409	0.0216791
54.15	0.0231062	0.02289	0.0231274	0.0130426	0.0129975	0.0132931
54.18	0.0230364	0.0228269	0.0230636	0.0129227	0.0128762	0.0131675
54.184							0.0240028	0.0222637	0.0214516
54.24							0.0238929	0.0221742	0.0213785
54.3	0.0228899	0.0226974	0.0229558	0.0123999	0.0123658	0.0126753
54.36							0.0235931	0.0219154	0.0211664
54.424	0.022617	0.0224447	0.0227183	0.0118981	0.0118575	0.0121703
54.45							0.0232418	0.0215992	0.0208962
54.544							0.0229665	0.0213547	0.020694
54.574	0.0222461	0.0220906	0.0223956	0.0113092	0.0112517	0.0115734
54.66							0.0225706	0.020997	0.0203947
54.694	0.0219682	0.0218256	0.0221649	0.010825	0.0107578	0.011095
54.784	0.0217153	0.0215775	0.0219475	0.0104846	0.0104019	0.0107463
54.784							0.0220541	0.0205296	0.0199879
54.814	0.0216009	0.0214595	0.0218427	0.0103893	0.0102965	0.0106398
54.87							0.0216922	0.0202007	0.0197012
54.934	0.0212026	0.0210555	0.021492	0.00997187	0.00985163	0.0101997
54.96							0.021315	0.0198563	0.0194037
55.024	0.0209103	0.0207609	0.0212383	0.00965353	0.00951566	0.0098679
55.084							0.0206994	0.0192989	0.0188905
55.144	0.0205138	0.0203626	0.0208947	0.00923069	0.00907045	0.00942442
55.17							0.0203071	0.0189421	0.018575
55.26	0.0200811	0.0199208	0.0205084	0.00885138	0.0086685	0.00901784
55.26							0.019859	0.0185357	0.0182007
55.35							0.0194041	0.0181238	0.017819
55.354	0.0197189	0.0195514	0.0201812	0.00854969	0.00835073	0.00869238
55.444	0.0193564	0.0191814	0.0198484	0.00826956	0.00805717	0.00838888
55.474							0.018767	0.0175485	0.0172831
55.534	0.0189827	0.0188006	0.0195003	0.00799563	0.00777217	0.00809159
55.564							0.0182864	0.0171086	0.016861
55.595	0.0187248	0.0185384	0.0192572	0.00781248	0.00758293	0.00789245
55.654							0.0178089	0.0166726	0.0164456
55.684	0.0183399	0.018148	0.0188898	0.00755055	0.00731404	0.00760828
55.744							0.0173295	0.0162322	0.0160247
55.804							0.0170097	0.0159365	0.0157419
55.805	0.0178027	0.0176049	0.0183674	0.00720426	0.00696164	0.00723523
55.951							0.0162279	0.0152063	0.015044
55.955	0.017124	0.0169215	0.0176937	0.00678655	0.00654068	0.00678804
56.011							0.0159104	0.0149062	0.014758
56.075	0.0165917	0.0163835	0.0171598	0.00644577	0.00619752	0.00640685
56.131	0.016315	0.0161078	0.0168707	0.00631479	0.00606899	0.0062899
56.161							0.0151267	0.0141538	0.0140428
56.225							0.0147887	0.0138311	0.0137418
56.255	0.0157404	0.0155286	0.016273	0.005997	0.00575306	0.00596234
56.311	0.0154823	0.0152676	0.0160023	0.00585489	0.00561117	0.00581499
56.345							0.0141699	0.0132281	0.0131767
56.375							0.014022	0.0130814	0.0130378
56.431	0.0149267	0.0147037	0.0154116	0.00556398	0.00532286	0.00552423
56.521	0.0145113	0.0142803	0.0149659	0.00535351	0.00511476	0.00531813
56.525							0.0132528	0.0123284	0.0123398
56.585							0.0129593	0.0120393	0.0120692
56.615	0.0140791	0.0138387	0.0145	0.00513961	0.00490283	0.00511096
56.735	0.0135346	0.0132806	0.013908	0.00489205	0.00467003	0.00489069
56.735							0.0121999	0.0112966	0.0113805
56.795	0.0132582	0.0129992	0.0136119	0.00475717	0.00453075	0.00475646
56.855							0.0116093	0.0107234	0.0108422
56.915	0.0127065	0.0124382	0.0130209	0.00450606	0.00427779	0.0045197
56.915							0.0113152	0.0104403	0.010574
57.005							0.0108814	0.0100268	0.010178
57.032	0.0121792	0.0119049	0.012458	0.00428475	0.00406705	0.00432562
57.122	0.0117642	0.0114875	0.0120218	0.00411313	0.00389584	0.00417114
57.156							0.0101754	0.00936557	0.00953343
57.182	0.0114786	0.0112003	0.0117258	0.00399712	0.00377596	0.00406621
57.186							0.0100359	0.00923637	0.00940554
57.276							0.00960376	0.00883561	0.00900359
57.306	0.010957	0.0106896	0.011182	0.00380784	0.0036136	0.00391131
57.426							0.00894407	0.0082401	0.00839529
57.456	0.0102786	0.0100195	0.0104933	0.00356009	0.00337225	0.00369758
57.486							0.00866191	0.00798249	0.00812723
57.516	0.0100142	0.00976039	0.0102274	0.00346847	0.00328525	0.00361982
57.576							0.00827327	0.00763498	0.00776222
57.636	0.00947922	0.00923292	0.0096946	0.00328589	0.00311208	0.00346944
57.696							0.00775479	0.00717026	0.00726979
57.723	0.00909169	0.00884837	0.00931106	0.00315617	0.00299133	0.00336738
57.783	0.00883032	0.00858924	0.00905233	0.00307058	0.00291293	0.0033008
57.786							0.00741231	0.00687155	0.00694746
57.873							0.00705868	0.00655527	0.00660965
57.906	0.0083862	0.00817611	0.00860884	0.00294677	0.00279582	0.00317424
57.963							0.0067416	0.0062787	0.00630701
58.027	0.0078821	0.00767475	0.00810734	0.0027856	0.00264876	0.00304858
58.087							0.00629877	0.00588447	0.00588126
58.147	0.00745925	0.00727267	0.00768438	0.00266375	0.00253347	0.0029291
58.173							0.00599313	0.00560808	0.0055872
58.207	0.00724466	0.00706565	0.00746872	0.00259906	0.00247423	0.00287003
58.263							0.0057274	0.00537164	0.00532564
58.327	0.00681616	0.00665083	0.00703393	0.00246641	0.0023568	0.0027528
58.387							0.00532905	0.00500456	0.00493756
58.417	0.00653831	0.00639202	0.00675574	0.00238203	0.00228334	0.00266647
58.477							0.00507423	0.0047681	0.00468398
58.507	0.00625344	0.00612433	0.00646763	0.00229029	0.00220892	0.00258043
58.567							0.00485823	0.00456527	0.00446134
58.597	0.00597819	0.00586841	0.00618966	0.00219816	0.0021391	0.00249514
58.654							0.0046447	0.00436042	0.00424268
58.718	0.00562155	0.00554098	0.00583086	0.0020727	0.00205246	0.00238195
58.744							0.00443146	0.00415286	0.0040235
58.868	0.00520218	0.00516224	0.0054135	0.00191502	0.00195753	0.00224536
58.868							0.0041505	0.00387615	0.00373439
58.954	0.00496034	0.00494637	0.00516863	0.00182201	0.00190548	0.00216645
58.954							0.00399858	0.00372026	0.00357234
59.018	0.00480624	0.00481001	0.00502483	0.00175649	0.00187555	0.00211376
59.044							0.00383348	0.00355202	0.00340141
59.074	0.00465376	0.00467604	0.00486985	0.00169615	0.00184455	0.00206308
59.165							0.00362176	0.00333661	0.00318705
59.199	0.00436133	0.00441828	0.00459656	0.00156965	0.00179151	0.00196318
59.225							0.00353673	0.00324683	0.00310191
59.319	0.00408656	0.0041765	0.00433772	0.00145241	0.00174233	0.00186913
59.345							0.0033436	0.00305338	0.00291676
59.439	0.00382806	0.00394742	0.00409875	0.00134385	0.0016966	0.00178028
59.439							0.00319112	0.00290558	0.00277611
59.499	0.00370433	0.00383688	0.00398557	0.00129348	0.00167446	0.00173765
59.559							0.00303302	0.00274967	0.00263525
59.586	0.00353006	0.00368014	0.00382664	0.00122512	0.00164254	0.00167734
59.649							0.00288516	0.00261653	0.0025072
59.709	0.00330712	0.00347309	0.00363153	0.00114469	0.001602	0.00160205
59.739							0.00276966	0.00251014	0.0024085
59.799							0.00270681	0.00245088	0.00235407
59.86	0.00303398	0.00321881	0.0033857	0.00105514	0.00154824	0.00150566
59.92	0.00293529	0.00312341	0.00329929	0.00102724	0.0015287	0.00147163
59.95							0.00253122	0.00229576	0.00219968
60.04	0.00274664	0.00293748	0.00313435	0.000979944	0.00149059	0.00140625
60.04							0.00243358	0.0022112	0.00210982
60.13	0.00261289	0.00280262	0.00301749	0.000951406	0.00146304	0.00135972
60.16							0.00232106	0.00211157	0.00199833
60.19	0.00252734	0.00271506	0.0029426	0.000935303	0.00144516	0.00132989
60.217							0.00226019	0.00206056	0.00193806
60.281	0.00240248	0.00258573	0.00283304	0.000914459	0.00141872	0.00128619
60.337							0.00214618	0.00196244	0.00181719
60.427							0.00207515	0.00189407	0.00173515
60.431	0.00220139	0.00237883	0.00266239	0.000884258	0.00137712	0.00121463
60.517							0.00200418	0.00182445	0.0016511
60.551	0.00205998	0.00222755	0.00253621	0.000867919	0.00134443	0.00116462
60.581							0.00195912	0.00177229	0.00159668
60.608	0.00201693	0.00216857	0.00248075	0.000866638	0.00132922	0.00114801
60.698	0.00191166	0.00206002	0.00239304	0.0008524	0.00130509	0.00110938
60.728							0.00185207	0.00165638	0.00146173
60.791							0.00181028	0.00159875	0.00141134
60.792	0.0018229	0.00195945	0.00230772	0.000841336	0.00128007	0.00107441
60.908							0.00173424	0.00149766	0.00131382
60.912	0.00171544	0.0018378	0.00220501	0.000825085	0.00124747	0.00103014
61.002	0.0016425	0.00175265	0.00213287	0.000811748	0.00122263	0.000997742
61.028							0.00166415	0.00139849	0.001216
61.062	0.00158372	0.00169194	0.00208325	0.00079877	0.00120455	0.000974847
61.092							0.00162405	0.00133568	0.00116893
61.212	0.00149201	0.00156868	0.0019785	0.00077461	0.00116351	0.000923066
61.213							0.00156006	0.00123127	0.00107958
61.303	0.00144594	0.00150055	0.00192127	0.000759218	0.0011387	0.000891218
61.303							0.00151704	0.00115377	0.00101747
61.363	0.00139434	0.00144144	0.00187549	0.000740872	0.00112118	0.000869672
61.389							0.00147202	0.00107751	0.000959842
61.51							0.00140642	0.000976685	0.000879657
61.513	0.00132463	0.00133162	0.00178661	0.000709778	0.00108127	0.000816916
61.6							0.00135662	0.000910977	0.000819892
61.604	0.00128122	0.00126361	0.00173259	0.000688278	0.0010577	0.000785398
61.664							0.00132195	0.000869638	0.000777761
61.694	0.00124055	0.00119825	0.00168002	0.000666925	0.00103506	0.000755076
61.78	0.00120239	0.00113611	0.0016295	0.00064609	0.00101425	0.000727545
61.784							0.00126495	0.000785074	0.000707348
61.874	0.00115851	0.00105815	0.00157075	0.000618552	0.000994446	0.000700518
61.9							0.00120743	0.00070892	0.000641509
61.995	0.00111201	0.000991843	0.00150234	0.000598304	0.000964107	0.000666898
61.995							0.00115908	0.000665809	0.000584629
62.115	0.00106366	0.000934053	0.00143196	0.000582742	0.000933449	0.000640105
62.115							0.00109744	0.000600273	0.000519784
62.201							0.00105713	0.000573245	0.000471862
62.205	0.00102586	0.000890442	0.00137658	0.000572144	0.000910951	0.000623988
62.262	0.00100158	0.000863128	0.00134044	0.000566315	0.000896754	0.000615158
62.265							0.0010308	0.000559789	0.000437825
62.386	0.000949437	0.0008175	0.00126132	0.000562729	0.000863228	0.000601683
62.386							0.000965333	0.00050102	0.000376246
62.476							0.000930693	0.000483422	0.000333088
62.506	0.000900136	0.000781621	0.00118249	0.000567519	0.000828928	0.000594033
62.566							0.000893989	0.000461162	0.000291323
62.626	0.000853777	0.000754656	0.00110211	0.000581579	0.00079232	0.000591026
62.656							0.000851754	0.000434033	0.000247293
62.686	0.000832124	0.000743489	0.00106137	0.000591743	0.000773312	0.000590609
62.777							0.000815083	0.000414371	0.000199351
62.807	0.000790397	0.00071763	0.000976079	0.000616922	0.00073508	0.00058727
62.867							0.000792581	0.000401236	0.000168537
62.893	0.000765655	0.000706362	0.000916681	0.000641074	0.000706059	0.000587037
62.984							0.000750216	0.000375329	0.000117988
62.987	0.000745344	0.000702765	0.000855902	0.000669295	0.000673172	0.000590505
63.077							0.00073072	0.000362208	9.01247e-05
63.108	0.000723199	0.000691723	0.000776469	0.000708561	0.000631841	0.000588735
63.168							0.000699559	0.000342199	4.99557e-05
63.198	0.000711426	0.000684361	0.000719819	0.000738401	0.000601255	0.000585731
63.258							0.000684488	0.000329703	2.63441e-05
63.288	0.000703796	0.000678754	0.000668403	0.000763179	0.000572344	0.000582688
63.348	0.000699532	0.000673573	0.000631938	0.000785778	0.00055107	0.000577341
63.348							0.000658022	0.000309956	-1.16889e-05
63.435							0.000645739	0.000296414	-3.35963e-05
63.469	0.000695904	0.000667242	0.000566768	0.000823368	0.000509696	0.000566833
63.555							0.000619584	0.00027038	-7.81526e-05
63.589	0.000694311	0.000662735	0.000512295	0.00084887	0.000471748	0.000556172
63.649							0.000604781	0.000251202	-0.000107566
63.71	0.000687395	0.000654126	0.000470654	0.000856564	0.000440055	0.00054796
63.77	0.000687057	0.00065459	0.000448734	0.000865948	0.000420391	0.000541494
63.77							0.000587757	0.00022616	-0.00014475
63.89	0.000676831	0.000648719	0.000417402	0.000866779	0.000388426	0.000534243
63.89							0.000573659	0.000202661	-0.000178502
63.92							0.000571827	0.000197937	-0.000182493
63.98	0.00067028	0.000649404	0.000395069	0.000866587	0.000362806	0.000527052
64.07							0.000554448	0.000171963	-0.000224759
64.071	0.000657707	0.000646433	0.000378427	0.000858927	0.000340289	0.000523331
64.131							0.000546472	0.000162893	-0.000234612
64.221	0.000629694	0.000639194	0.000357298	0.000838684	0.000307384	0.000520634
64.221							0.000536598	0.000152108	-0.00025653
64.311							0.00052549	0.000143824	-0.000274109
64.372	0.000593382	0.000628521	0.000340974	0.000811847	0.000280685	0.000520961
64.402	0.000585108	0.000625252	0.0003383	0.000806155	0.000276552	0.000521555
64.458							0.000508695	0.000138125	-0.000296955
64.492	0.000559331	0.000615404	0.000330111	0.000788727	0.000265643	0.000523057
64.582	0.000531871	0.000603969	0.000321823	0.00077147	0.000257606	0.000524726
64.582							0.000493056	0.00013853	-0.00031059
64.672							0.000478804	0.000138232	-0.000317956
64.673	0.000502904	0.000589935	0.000313086	0.000754983	0.000253022	0.000526503
64.763	0.000473877	0.00057427	0.000303468	0.000740178	0.000251606	0.000527942
64.763							0.000471429	0.000146436	-0.000321015
64.853							0.000462204	0.000152651	-0.00032167
64.884	0.000437642	0.000546437	0.00029071	0.000722267	0.000260783	0.000527091
64.974							0.00045218	0.000162565	-0.000317875
65.004	0.000402909	0.00052184	0.000273563	0.000708607	0.000268371	0.000526096
65.064							0.000448826	0.000173807	-0.000312465
65.094	0.000375414	0.000505703	0.000255909	0.00070248	0.000269017	0.00052847
65.15							0.000443939	0.000180042	-0.000304653
65.184	0.000353134	0.000486332	0.000239007	0.000696839	0.000276684	0.000528075
65.275	0.000334771	0.000466823	0.000221406	0.00069185	0.000286391	0.000526552
65.275							0.000430274	0.000176833	-0.000286526
65.331							0.000430055	0.000182001	-0.00027984
65.392	0.000323478	0.000444072	0.000202615	0.000682819	0.000304687	0.00051825
65.452							0.000419834	0.00017922	-0.000260499
65.482	0.000309446	0.000428001	0.00018054	0.000680208	0.000309387	0.000520103
65.546							0.000413663	0.000176574	-0.000246322
65.576	0.000303612	0.000413405	0.000161161	0.000674265	0.000317955	0.000517574
65.606							0.000406434	0.00017186	-0.000237518
65.696	0.000304551	0.000399443	0.00013984	0.000662902	0.000328923	0.000511422
65.757	0.000307864	0.000394513	0.000130531	0.000655432	0.000333935	0.000507458
65.757							0.000395398	0.000154295	-0.000215127
65.847	0.000311256	0.000384776	0.000115484	0.000645158	0.00034145	0.000504391
65.877							0.000378189	0.000134265	-0.000203316
65.967							0.000365269	0.000111451	-0.000193519
65.968	0.00032994	0.000388168	0.000108435	0.000620184	0.00034778	0.000490279
66.088	0.000346923	0.000391225	0.00010445	0.00059376	0.0003534	0.000478287
66.088							0.000344903	8.39254e-05	-0.000191605
66.148							0.000333582	6.38053e-05	-0.000188117
66.208	0.000363613	0.00039146	0.000105647	0.000565984	0.000360685	0.00046576
66.268							0.000311861	3.3269e-05	-0.000195291
66.303	0.000376391	0.000404435	0.000114013	0.000538022	0.000360405	0.000453796
66.329							0.000300083	1.59833e-05	-0.000199815
66.389	0.000383535	0.000417727	0.000124322	0.000512792	0.000359307	0.000444288
66.449							0.000275705	-1.84858e-05	-0.000212021
66.48	0.000388564	0.000424741	0.00013633	0.000488332	0.000361056	0.000434273
66.54	0.000393434	0.000422365	0.000144936	0.000472325	0.000364911	0.000425229
66.54							0.000256031	-4.44561e-05	-0.000223945
66.634							0.000232886	-7.07724e-05	-0.000238328
66.66	0.000392161	0.000428162	0.000165325	0.000441251	0.000367528	0.000411193
66.751							0.000206557	-0.000101291	-0.000259124
66.811	0.000383932	0.000426693	0.000192918	0.00040375	0.000373869	0.000390749
66.841							0.000186677	-0.000124789	-0.000275338
66.901	0.000371101	0.000425076	0.000208117	0.000386146	0.000378093	0.000381172
66.931							0.000169918	-0.000151257	-0.00028893
67.022	0.000348579	0.000418512	0.000225889	0.000366843	0.000386226	0.000368496
67.022							0.000150568	-0.000176951	-0.000302851
67.082	0.0003269	0.000413759	0.000226091	0.000373231	0.000389144	0.000370086
67.172	0.000305844	0.0004027	0.000232636	0.000366498	0.000397955	0.000360804
67.172							0.000121325	-0.000223008	-0.000320138
67.233							0.000106712	-0.000237096	-0.000329317
67.293	0.00027796	0.000387839	0.000240658	0.000355305	0.000412693	0.000346603
67.353	0.00026642	0.000385751	0.000249933	0.00034108	0.000422421	0.000337999
67.353							8.46525e-05	-0.000273707	-0.000337137
67.443							6.53165e-05	-0.000293452	-0.000345946
67.474	0.000230849	0.000360818	0.00023434	0.000358518	0.000435606	0.000331238
67.53							4.98833e-05	-0.000315905	-0.000348323
67.564	0.000209174	0.000346699	0.000225933	0.000363493	0.000446929	0.000324177
67.621							3.41471e-05	-0.000336497	-0.000349146
67.654	0.000189574	0.000332493	0.000214514	0.000369896	0.000457444	0.000317372
67.745							1.36349e-05	-0.000359103	-0.000347807
67.775	0.000167506	0.000307649	0.000190303	0.000382873	0.000467246	0.00030738
67.835							-4.95116e-07	-0.000370941	-0.000345687
67.899	0.000149312	0.000301191	0.000176291	0.000387444	0.000479966	0.000299947
67.922							-1.34551e-05	-0.000378315	-0.000343549
67.986	0.000140321	0.000276642	0.000151162	0.000395334	0.000478423	0.000291056
68.02							-2.61847e-05	-0.000383748	-0.000340372
68.103							-3.69527e-05	-0.000381096	-0.000342716
68.107	0.000131015	0.000265236	0.000128306	0.000400208	0.000480537	0.000281686
68.167	0.000127874	0.000257683	0.000115355	0.000401491	0.00047875	0.000276472
68.193							-4.5027e-05	-0.000380269	-0.000342592
68.257	0.000124424	0.000246189	9.5739e-05	0.000401137	0.000473446	0.000268448
68.317							-5.19898e-05	-0.00037725	-0.000344342
68.378	0.000121134	0.000230981	7.00733e-05	0.000395808	0.000461781	0.00025782
68.468							-5.35348e-05	-0.000372859	-0.000351104
68.498	0.000118321	0.000216925	4.61191e-05	0.000385477	0.00044591	0.000247994
68.559	0.000116503	0.000209882	3.48462e-05	0.000378108	0.000436153	0.000243708
68.559							-5.0895e-05	-0.000371441	-0.000357338
68.649							-4.45322e-05	-0.000370466	-0.000367749
68.683	0.000113848	0.000199419	1.13621e-05	0.000364933	0.000415017	0.000234071
68.739							-4.01693e-05	-0.000374154	-0.000374293
68.803	0.000104094	0.000183134	-2.99666e-06	0.000338729	0.00038743	0.000233437
68.83							-3.17334e-05	-0.000377686	-0.000386986
68.89	9.78449e-05	0.000176212	-1.51692e-05	0.000325804	0.000366833	0.000231783
68.92							-2.09041e-05	-0.000380212	-0.00040105
68.981	8.62795e-05	0.000161897	-2.067e-05	0.000302245	0.000342794	0.000236525
69.037							-1.23821e-05	-0.00039254	-0.00042183
69.041	7.8486e-05	0.000154374	-2.50248e-05	0.000290118	0.00032651	0.000239477
69.131							-3.10981e-06	-0.000396005	-0.000437891
69.161	5.98098e-05	0.000136643	-3.06068e-05	0.000265558	0.000292883	0.000248565
69.222							2.33497e-06	-0.000401213	-0.000454719
69.252	4.17979e-05	0.000123534	-3.45333e-05	0.000250881	0.000265575	0.000258251
69.342							5.8076e-06	-0.000401746	-0.000475151
69.373	1.60691e-05	9.73818e-05	-3.51399e-05	0.000229087	0.000232085	0.000272609
69.433							3.97558e-06	-0.000407659	-0.000494005
69.493	-1.17322e-05	6.57394e-05	-3.47257e-05	0.000210871	0.000201888	0.00028644
69.55							-2.50676e-06	-0.000403007	-0.000513922
69.584	-3.34809e-05	3.7642e-05	-3.44575e-05	0.000199368	0.000182203	0.000294857
69.614							-7.7012e-06	-0.000406202	-0.000527155
69.674	-4.78507e-05	7.21988e-06	-3.22684e-05	0.000187458	0.000169358	0.00029364
69.734							-2.11979e-05	-0.000400566	-0.000547964
69.765	-7.07033e-05	-2.5619e-05	-3.47841e-05	0.000180692	0.000154809	0.000296559
69.825							-3.35604e-05	-0.000395728	-0.000563344
69.855	-0.000100573	-6.59276e-05	-4.11039e-05	0.00017715	0.000142778	0.000302559
69.915							-4.71909e-05	-0.000389885	-0.000577867
69.946	-0.000117379	-0.000102543	-4.57952e-05	0.000171513	0.000136077	0.000293409
70.036							-6.82365e-05	-0.000379626	-0.000597543
70.062	-0.000147202	-0.000161228	-5.7702e-05	0.000167733	0.000132234	0.000284649
70.126							-8.20468e-05	-0.00037482	-0.000608625
70.187	-0.000160801	-0.000207653	-7.21062e-05	0.000161139	0.000126162	0.000257534
70.213							-9.72882e-05	-0.000368234	-0.000620361
70.277	-0.000176259	-0.000252729	-8.60834e-05	0.000158082	0.000126248	0.000241565
70.337							-0.000118482	-0.000358428	-0.000635122
70.368	-0.000188537	-0.000299001	-0.000101631	0.000154618	0.000127191	0.000222944
70.398							-0.000130661	-0.000356133	-0.000645338
70.458	-0.000193607	-0.000336212	-0.000117478	0.000149219	0.000124401	0.000201222
70.518							-0.000149727	-0.000344283	-0.000657321
70.549	-0.000192552	-0.000363451	-0.000132424	0.000141336	0.000117119	0.000178229
70.609							-0.00016548	-0.000341475	-0.000670173
70.639	-0.000189955	-0.000391945	-0.000146051	0.00013236	0.00010978	0.000157038
70.73							-0.000183437	-0.000327299	-0.000684369
70.76	-0.000179581	-0.000416468	-0.000157929	0.00011663	9.43872e-05	0.000130858
70.82							-0.000196663	-0.000327023	-0.000696648
70.881	-0.000166024	-0.000443175	-0.000167812	9.64076e-05	7.62794e-05	0.000106875
70.911							-0.000208603	-0.000321363	-0.000708824
70.941	-0.000157018	-0.000455386	-0.000172764	8.28375e-05	6.46412e-05	9.52955e-05
71.001							-0.000219521	-0.000317299	-0.000721042
71.092	-0.000131421	-0.000457416	-0.00016156	5.15239e-05	3.16013e-05	7.47544e-05
71.122							-0.000233057	-0.000314324	-0.000737148
71.182	-0.000115167	-0.000455709	-0.000150996	2.9589e-05	9.04577e-06	6.46174e-05
71.212							-0.000242613	-0.000314363	-0.000748331
71.299	-9.35217e-05	-0.000448324	-0.000132765	-3.17932e-06	-2.29282e-05	5.3505e-05
71.333							-0.000255587	-0.000318022	-0.000761325
71.393	-7.64923e-05	-0.000437861	-0.000114132	-3.32117e-05	-4.99232e-05	4.62032e-05
71.423							-0.000263258	-0.000318363	-0.000772639
71.454	-6.89546e-05	-0.00042794	-9.3531e-05	-4.01972e-05	-6.55302e-05	4.61633e-05
71.514							-0.000278475	-0.000332737	-0.00077341
71.574	-5.41589e-05	-0.00040652	-5.47905e-05	-5.54691e-05	-9.6734e-05	4.69428e-05
71.604							-0.000292979	-0.00034422	-0.000775088
71.665	-4.39836e-05	-0.000388083	-2.53891e-05	-5.99744e-05	-0.000118577	5.00383e-05
71.721							-0.000316445	-0.000363116	-0.00077234
71.725	-3.68747e-05	-0.000376762	-7.72477e-06	-8.12678e-05	-0.000134984	4.81341e-05
71.812							-0.000337616	-0.000379831	-0.000767464
71.876	-2.26949e-05	-0.000343841	3.83129e-05	-8.13036e-05	-0.000165041	5.54172e-05
71.906	-2.11244e-05	-0.000338056	4.83259e-05	-8.64548e-05	-0.000171489	5.58244e-05
71.936							-0.000370686	-0.000405519	-0.000757563
71.996							-0.000394466	-0.000420295	-0.000747609
72.057	-6.96745e-06	-0.00030572	8.44277e-05	-7.31601e-05	-0.000189729	6.3328e-05
72.117							-0.000433837	-0.000447459	-0.000734741
72.178	4.04813e-06	-0.000282961	0.000106971	-6.09234e-05	-0.000196833	6.69527e-05
72.208							-0.000462227	-0.00046973	-0.000726955
72.268	1.0026e-05	-0.000269571	0.000122508	-5.04672e-05	-0.000200479	6.77196e-05
72.328							-0.000506426	-0.000497448	-0.000714784
72.359	2.21954e-05	-0.000256208	0.000126385	-3.82034e-05	-0.00019244	6.69711e-05
72.419	2.51465e-05	-0.000250823	0.000133701	-2.77075e-05	-0.000192991	6.49108e-05
72.419							-0.000539852	-0.00052042	-0.000707851
72.506							-0.000570806	-0.00053325	-0.000702605
72.54	3.94106e-05	-0.000241402	0.000133127	-1.09449e-05	-0.000177812	5.81327e-05
72.596							-0.00060068	-0.000548081	-0.000699898
72.634	5.1273e-05	-0.000238157	0.000128039	-7.90045e-07	-0.000161444	5.02292e-05
72.721							-0.000637772	-0.000565239	-0.000699824
72.785	7.02659e-05	-0.000242701	0.000112902	2.6018e-06	-0.000126611	3.42807e-05
72.811							-0.000659117	-0.00057441	-0.000702305
72.902	8.36688e-05	-0.000249095	0.000100962	9.68836e-06	-0.000104753	1.84644e-05
72.902							-0.000675431	-0.000581831	-0.0007064
72.992							-0.000675012	-0.000585563	-0.000713056
73.023	9.34027e-05	-0.000265566	8.63271e-05	-1.90928e-06	-7.71618e-05	2.69505e-06
73.083	9.99673e-05	-0.000270119	7.9969e-05	-4.25888e-07	-6.76046e-05	-6.3352e-06
73.113							-0.000700586	-0.000598299	-0.000717584
73.144	9.92505e-05	-0.000284153	7.32646e-05	-1.56055e-05	-5.49749e-05	-1.3583e-05
73.204							-0.000683652	-0.000604372	-0.000724912
73.264							-0.000663968	-0.00061016	-0.000730238
73.294	9.85579e-05	-0.00030992	6.01388e-05	-4.01368e-05	-3.41589e-05	-3.2507e-05
73.359	9.66831e-05	-0.000319988	5.58981e-05	-5.13319e-05	-2.74807e-05	-4.00232e-05
73.415							-0.000645398	-0.00063344	-0.000738107
73.419	9.69647e-05	-0.00032607	5.31199e-05	-5.94573e-05	-2.18146e-05	-4.64274e-05
73.506	8.73166e-05	-0.000340672	5.00363e-05	-8.00691e-05	-1.67989e-05	-5.40868e-05
73.506							-0.000620036	-0.000652081	-0.000743875
73.626							-0.000579483	-0.000682341	-0.000752732
73.657	4.24111e-05	-0.000374039	4.40128e-05	-0.000125591	-2.16404e-05	-6.42487e-05
73.717							-0.000538783	-0.000709356	-0.000764605
73.778	-1.45705e-06	-0.000393853	3.86635e-05	-0.000155615	-3.23699e-05	-6.90369e-05
73.838							-0.000499405	-0.000747683	-0.000773836
73.868	-1.57469e-05	-0.000398429	4.04337e-05	-0.000172855	-3.39499e-05	-6.93797e-05
73.928							-0.000464604	-0.000777646	-0.000786068
73.959	-5.02749e-05	-0.000407913	3.72469e-05	-0.000192154	-4.46607e-05	-6.84545e-05
74.019							-0.000430253	-0.000807755	-0.00080193
74.049	-8.99048e-05	-0.00041622	3.15712e-05	-0.000208993	-5.86861e-05	-6.59911e-05
74.14							-0.000388559	-0.00084534	-0.000825167
74.17	-0.000144256	-0.00042415	2.12512e-05	-0.000227903	-7.97836e-05	-6.01243e-05
74.23							-0.000360484	-0.000870398	-0.000845639
74.264	-0.000189179	-0.000428132	9.05809e-06	-0.000238993	-9.9101e-05	-5.44656e-05
74.351	-0.000225051	-0.000430734	-5.05266e-07	-0.000249557	-0.000114604	-4.75091e-05
74.351							-0.000327498	-0.000898783	-0.000875975
74.411							-0.000313337	-0.000910482	-0.000892782
74.412	-0.000248028	-0.000432782	-6.04162e-06	-0.000257487	-0.000124132	-4.17442e-05
74.502	-0.000297372	-0.000430401	-3.26282e-05	-0.000257961	-0.000150499	-3.88512e-05
74.532							-0.000288851	-0.000928744	-0.000925564
74.623							-0.000273987	-0.000938243	-0.000950174
74.653	-0.000369911	-0.000420048	-8.41144e-05	-0.000256197	-0.000193735	-3.95806e-05
74.744							-0.000258775	-0.000946196	-0.000982719
74.774	-0.000420197	-0.000409325	-0.00012839	-0.000256226	-0.000224622	-4.57175e-05
74.834							-0.000250221	-0.000949204	-0.00100583
74.865	-0.000455478	-0.000404236	-0.000159206	-0.000259883	-0.000241881	-5.11561e-05
74.925							-0.000240476	-0.000950078	-0.0010289
74.955	-0.000489228	-0.000389841	-0.00020537	-0.000258927	-0.000267011	-6.91917e-05
75.046	-0.000521367	-0.000377896	-0.000250582	-0.000262045	-0.000288113	-8.99715e-05
75.046							-0.000242169	-0.000950305	-0.00105424
75.14	-0.000553942	-0.000367442	-0.000298508	-0.000268336	-0.000307439	-0.000115299
75.167							-0.000239801	-0.000948826	-0.00107885
75.227							-0.000233392	-0.000948684	-0.00109479
75.257	-0.000593541	-0.000355773	-0.000361949	-0.00027976	-0.000330677	-0.000154004
75.321	-0.000618099	-0.000354062	-0.000397294	-0.0002885	-0.0003401	-0.000174771
75.348							-0.000231312	-0.000948124	-0.00111809
75.408							-0.000239272	-0.000947101	-0.00112242
75.442	-0.000652365	-0.000340904	-0.000467884	-0.000305729	-0.000368573	-0.000229568
75.529							-0.000230454	-0.000949732	-0.0011485
75.563	-0.000699708	-0.000344682	-0.000542258	-0.000329738	-0.000387743	-0.000277357
75.62	-0.000705864	-0.000335914	-0.000570812	-0.000338972	-0.000405646	-0.000309302
75.62							-0.000229856	-0.000952265	-0.00116276
75.741	-0.000732879	-0.000335184	-0.000635368	-0.000363383	-0.000433786	-0.000365458
75.741							-0.000227565	-0.000958011	-0.00118156
75.831							-0.000226154	-0.000964136	-0.00119469
75.865	-0.000768578	-0.000344522	-0.000704118	-0.000392469	-0.000460926	-0.000417958
75.922							-0.000224055	-0.000972174	-0.00120792
75.956	-0.000794748	-0.000353643	-0.000752341	-0.00041494	-0.000483079	-0.000455238
76.016	-0.000815741	-0.000360867	-0.000784077	-0.000430906	-0.000499567	-0.000479262
76.043							-0.000228696	-0.000986101	-0.00122107
76.103							-0.000227579	-0.000994374	-0.00122942
76.133	-0.00082913	-0.000373158	-0.000828071	-0.000455703	-0.000529281	-0.000520991
76.224							-0.000218469	-0.00101312	-0.0012504
76.284	-0.000868819	-0.000391594	-0.00088304	-0.000490429	-0.000577862	-0.000571283
76.345							-0.000232299	-0.00103553	-0.00126067
76.379	-0.000862367	-0.000410512	-0.000903094	-0.000511672	-0.000593684	-0.000589863
76.436	-0.00085917	-0.000423817	-0.000913142	-0.000526717	-0.000602115	-0.000598435
76.436							-0.00022587	-0.00105344	-0.00127918
76.496	-0.000864107	-0.000435589	-0.000924624	-0.000541726	-0.000616275	-0.000608928
76.526							-0.000235369	-0.00107207	-0.00129115
76.617	-0.000869245	-0.00046174	-0.000941715	-0.00057384	-0.000642072	-0.000624272
76.647							-0.000255608	-0.00109717	-0.00130745
76.768							-0.000289565	-0.00111761	-0.00132359
76.802	-0.000883868	-0.000493759	-0.000961955	-0.000614788	-0.00069321	-0.000643312
76.828							-0.000307097	-0.00113037	-0.00133208
76.919	-0.000868515	-0.000528366	-0.000957093	-0.000656449	-0.000705717	-0.00064194
76.919							-0.00034427	-0.00114028	-0.00134669
76.949	-0.000868733	-0.000532883	-0.000958467	-0.000662629	-0.000713836	-0.000643481
77.04							-0.000401015	-0.00115384	-0.00136664
77.07	-0.000855907	-0.000560695	-0.00095309	-0.00069816	-0.000734274	-0.00064394
77.13							-0.00045009	-0.00116084	-0.0013827
77.131	-0.000849537	-0.000571229	-0.000952067	-0.000712577	-0.000746402	-0.000645219
77.221							-0.000505393	-0.00116841	-0.00139604
77.252	-0.000829508	-0.000596614	-0.000943871	-0.000744537	-0.000763453	-0.000646536
77.342	-0.000811826	-0.00061503	-0.000937312	-0.000766169	-0.000773602	-0.000648898
77.342							-0.000586796	-0.0011729	-0.00141461
77.433	-0.000791953	-0.000637903	-0.000926537	-0.000788297	-0.000779358	-0.000651947
77.433							-0.000648205	-0.00117125	-0.00143982
77.524	-0.000773992	-0.000671601	-0.000906435	-0.000810353	-0.000779704	-0.000654758
77.554							-0.00073386	-0.00117105	-0.0014686
77.644							-0.000797932	-0.00117122	-0.00149042
77.645	-0.000741016	-0.000688969	-0.000908335	-0.000830023	-0.000783177	-0.000668246
77.735							-0.000861147	-0.00117358	-0.00151389
77.765	-0.000723113	-0.000740312	-0.000884707	-0.000847078	-0.000777123	-0.000677214
77.856	-0.00070729	-0.000775198	-0.000875072	-0.000857553	-0.00077102	-0.000686972
77.856							-0.000942898	-0.00117886	-0.0015426
77.917	-0.000691196	-0.000796438	-0.000871516	-0.000867854	-0.000764632	-0.000695515
77.917							-0.000979046	-0.00119127	-0.00156071
78.037							-0.00105427	-0.00119848	-0.00158085
78.038	-0.000687353	-0.000858893	-0.000858541	-0.000869619	-0.000757487	-0.000705836
78.128							-0.00110202	-0.00122206	-0.00159852
78.132	-0.000683557	-0.00090768	-0.000853568	-0.000871608	-0.00075267	-0.000714307
78.249	-0.00067214	-0.000970967	-0.000847954	-0.000881694	-0.000745606	-0.000726174
78.249							-0.00116448	-0.00124037	-0.00161098
78.309							-0.00118958	-0.00126482	-0.00161741
78.34	-0.000685085	-0.00102337	-0.000853188	-0.00087371	-0.000753364	-0.000728843
78.435	-0.000692962	-0.00107789	-0.000859347	-0.000872517	-0.000762664	-0.000732043
78.461							-0.00125088	-0.00131215	-0.00162285
78.552	-0.000706673	-0.00114449	-0.000871489	-0.000871757	-0.000782028	-0.000733072
78.552							-0.00128362	-0.0013406	-0.00162316
78.586	-0.000700269	-0.00116918	-0.000864726	-0.000882233	-0.000778889	-0.000735692
78.608							-0.00130086	-0.00137299	-0.00161919
78.733	-0.000736708	-0.00124341	-0.000897891	-0.000873309	-0.000828664	-0.000727844
78.763							-0.00134849	-0.00143329	-0.00161705
78.854							-0.00137418	-0.00147716	-0.00161326
78.858	-0.000756492	-0.00131643	-0.000907142	-0.00088456	-0.000859354	-0.000720506
78.945							-0.00139925	-0.00152189	-0.00160567
78.949	-0.00078667	-0.00135015	-0.000934484	-0.000881811	-0.000904799	-0.000711631
79.035							-0.00142369	-0.00156411	-0.00160415
79.036	-0.000810725	-0.00138944	-0.000947778	-0.000888078	-0.000938363	-0.000702642
79.126	-0.000839397	-0.0014228	-0.000963639	-0.000894636	-0.000977405	-0.000693126
79.156							-0.00145608	-0.00161875	-0.00160661
79.221	-0.000870719	-0.00145687	-0.000975823	-0.000904284	-0.00101603	-0.00068234
79.247							-0.00148037	-0.00165915	-0.00161759
79.278	-0.000887513	-0.00149761	-0.000969419	-0.000912702	-0.00102554	-0.000667226
79.368							-0.00151083	-0.00170454	-0.00162881
79.429	-0.000944519	-0.001529	-0.000988453	-0.00092898	-0.00109161	-0.000653507
79.459							-0.00153218	-0.0017334	-0.00164022
79.55	-0.000987539	-0.00152479	-0.000999052	-0.000949855	-0.00114034	-0.000661326
79.55							-0.00155013	-0.00175246	-0.00164767
79.614	-0.00101073	-0.00154574	-0.000996612	-0.000957399	-0.001159	-0.000651293
79.64							-0.00156769	-0.00177093	-0.0016628
79.701	-0.00104	-0.00155294	-0.000994604	-0.000971193	-0.0011847	-0.000651801
79.731							-0.00158183	-0.00178041	-0.00167515
79.852	-0.0010899	-0.00156814	-0.000988383	-0.000989673	-0.00122758	-0.000650514
79.852							-0.0016039	-0.00179797	-0.00169964
79.973							-0.0016239	-0.00180751	-0.00171912
80.007	-0.00112834	-0.00154857	-0.000977231	-0.00101698	-0.00125615	-0.000682856
80.068	-0.00114252	-0.00154207	-0.000973037	-0.00102544	-0.00126641	-0.00069572
80.094							-0.00164316	-0.0018129	-0.00173421
80.159	-0.0011622	-0.00153095	-0.000967522	-0.00103685	-0.00128019	-0.000717288
80.185							-0.00165773	-0.00181635	-0.00174258
80.246	-0.0011738	-0.00151495	-0.000961724	-0.00105107	-0.00128499	-0.000744368
80.249							-0.00166366	-0.00181548	-0.00174624
80.336							-0.00167674	-0.00182066	-0.00174989
80.37	-0.00120279	-0.00149903	-0.000962412	-0.00105834	-0.00130725	-0.000776003
80.457							-0.00170018	-0.00183382	-0.00175089
80.491	-0.00122943	-0.00147754	-0.000968643	-0.00106435	-0.00132651	-0.000812895
80.548	-0.00121997	-0.00146494	-0.000970091	-0.00108135	-0.00131522	-0.000829606
80.578							-0.00171749	-0.00184889	-0.00174674
80.639	-0.00123819	-0.00144655	-0.0009831	-0.00108466	-0.00132986	-0.000856622
80.639							-0.00171913	-0.00185756	-0.00174305
80.7	-0.00125732	-0.00143214	-0.000995638	-0.00108109	-0.00134589	-0.000877188
80.76							-0.0017412	-0.00188203	-0.00173289
80.85							-0.0017388	-0.00190273	-0.00172469
80.851	-0.00126875	-0.0013949	-0.00103407	-0.00109466	-0.0013602	-0.000916941
80.971							-0.00173794	-0.00193586	-0.00171255
80.975	-0.00127372	-0.0013607	-0.0010792	-0.00110639	-0.00137519	-0.000944773
81.062							-0.00173258	-0.00196397	-0.00170373
81.066	-0.00128337	-0.0013316	-0.00112051	-0.00110751	-0.00139404	-0.000967213
81.127	-0.00126437	-0.00131681	-0.00115173	-0.00113281	-0.00139191	-0.000967708
81.183							-0.00171929	-0.0020046	-0.0016933
81.244	-0.00126082	-0.00127978	-0.00121939	-0.00115024	-0.00141246	-0.000985723
81.274							-0.00170547	-0.0020366	-0.00168651
81.308	-0.00126315	-0.00125687	-0.00125936	-0.00115424	-0.00142775	-0.00099844
81.365							-0.00168876	-0.00206902	-0.00168123
81.43	-0.00124975	-0.00122128	-0.00134295	-0.00118908	-0.00144617	-0.00101009
81.46							-0.00166904	-0.00210297	-0.00168362
81.52	-0.00124317	-0.00119462	-0.00140693	-0.00121427	-0.00146123	-0.00102087
81.577							-0.00164538	-0.00214172	-0.00168465
81.638	-0.00123445	-0.00116404	-0.001492	-0.0012564	-0.00147724	-0.00103397
81.698							-0.00162164	-0.00217687	-0.00168668
81.758							-0.00161125	-0.00219198	-0.00169021
81.759	-0.00122816	-0.00114009	-0.0015773	-0.00131001	-0.00148787	-0.00104693
81.819	-0.00122495	-0.00112885	-0.00161706	-0.00133999	-0.00149117	-0.00105389
81.879							-0.00158871	-0.00221545	-0.00169062
81.91	-0.00121609	-0.00110935	-0.00167166	-0.00139274	-0.00149342	-0.00106525
82.001							-0.00157512	-0.00223086	-0.00170496
82.035	-0.00122374	-0.00111158	-0.00174257	-0.00146712	-0.00148697	-0.00107885
82.091							-0.00156898	-0.00223603	-0.00171855
82.152	-0.00122053	-0.00110651	-0.00179178	-0.00154928	-0.00147625	-0.00109452
82.182							-0.00157213	-0.00223789	-0.00174008
82.213	-0.00123326	-0.00112155	-0.00181512	-0.00158347	-0.00146821	-0.00110226
82.273							-0.00157714	-0.0022349	-0.00176056
82.307	-0.00124136	-0.00113524	-0.00184001	-0.0016448	-0.00145423	-0.00111631
82.394							-0.00156936	-0.00221957	-0.00178608
82.395	-0.00125363	-0.00115632	-0.00185521	-0.00169707	-0.00143969	-0.00113043
82.485							-0.00158017	-0.00221082	-0.00181162
82.546	-0.00126451	-0.0011887	-0.00186178	-0.00179056	-0.00140957	-0.00115862
82.606							-0.00158912	-0.00219569	-0.0018482
82.667	-0.00128548	-0.00123305	-0.00185523	-0.00184489	-0.00138489	-0.00118238
82.697	-0.00129778	-0.00125172	-0.00185259	-0.00184923	-0.00138175	-0.00118772
82.697							-0.00159512	-0.00218519	-0.00187778
82.818							-0.00160281	-0.00217521	-0.00191475
82.849	-0.00132321	-0.00131236	-0.00183222	-0.00190191	-0.00134671	-0.00121965
82.913							-0.00160357	-0.00216996	-0.00195101
83							-0.00160335	-0.00216869	-0.00197798
83.004	-0.00135481	-0.00138435	-0.00181049	-0.00193442	-0.00130685	-0.00125105
83.091	-0.00138102	-0.0014327	-0.00180053	-0.00193833	-0.00129028	-0.00126673
83.094							-0.00159943	-0.00217075	-0.00201253
83.155	-0.00141104	-0.00147381	-0.00179303	-0.00192904	-0.00129206	-0.00127763
83.212							-0.00159061	-0.00217824	-0.00205642
83.273	-0.00145249	-0.00153983	-0.00178833	-0.00192316	-0.00127856	-0.00129537
83.333							-0.00157836	-0.0021913	-0.00210331
83.363	-0.00148745	-0.00158974	-0.00179053	-0.00191444	-0.00127437	-0.00130654
83.424							-0.00156727	-0.00220306	-0.00213947
83.454	-0.00152346	-0.00163889	-0.00179921	-0.00190478	-0.00127326	-0.00131521
83.518							-0.001557	-0.00221985	-0.00217609
83.549	-0.00156194	-0.00168882	-0.00181535	-0.00189411	-0.00127719	-0.00132129
83.636							-0.00154329	-0.00223947	-0.00222465
83.666	-0.0016152	-0.00174253	-0.00183635	-0.00187878	-0.00130063	-0.00132883
83.73							-0.00153408	-0.00225071	-0.00226935
83.731	-0.00164188	-0.00177277	-0.0018547	-0.00187266	-0.00131273	-0.00133017
83.787							-0.00153064	-0.00225972	-0.00229462
83.848	-0.00168941	-0.00182768	-0.00189764	-0.00186293	-0.00134152	-0.00132903
83.908							-0.00152997	-0.00227179	-0.00235401
83.909	-0.00171493	-0.00185317	-0.00191959	-0.00185851	-0.00136271	-0.00132917
84.029							-0.00153488	-0.00229252	-0.00240287
84.03	-0.00176462	-0.00190031	-0.00196433	-0.00185229	-0.00141174	-0.00133041
84.09	-0.00179181	-0.0019271	-0.00199458	-0.00184829	-0.0014404	-0.00132853
84.12							-0.00154529	-0.002303	-0.00244138
84.242	-0.00184419	-0.00197284	-0.00203733	-0.00185245	-0.0015081	-0.00134162
84.242							-0.00156427	-0.00231826	-0.0024887
84.332							-0.00159011	-0.00231699	-0.00252453
84.333	-0.0018763	-0.00200283	-0.00206675	-0.00185621	-0.00155021	-0.00135072
84.423							-0.00161314	-0.0023225	-0.00255617
84.458	-0.00191925	-0.00204395	-0.00210315	-0.00186435	-0.00160608	-0.00136895
84.518	-0.00192956	-0.00206027	-0.00211368	-0.00187324	-0.00162762	-0.00138398
84.544							-0.00165589	-0.00231758	-0.00259082
84.639	-0.00196301	-0.0020997	-0.00213968	-0.00188587	-0.00167402	-0.00141423
84.669							-0.00170232	-0.00230959	-0.00261759
84.73	-0.00200075	-0.00213349	-0.00215716	-0.00189149	-0.00170926	-0.0014385
84.757							-0.00173222	-0.00230208	-0.00263846
84.851							-0.00177105	-0.00229055	-0.00264273
84.852	-0.00203031	-0.00217431	-0.00217014	-0.00190371	-0.00174637	-0.00148324
84.908	-0.00202995	-0.00219013	-0.00217544	-0.00191031	-0.00176013	-0.00150863
84.939							-0.00180413	-0.0022781	-0.00264941
85.003	-0.00204579	-0.00222141	-0.0021808	-0.00191538	-0.00178449	-0.00155097
85.06							-0.00184703	-0.00225515	-0.0026618
85.12							-0.0018718	-0.00224793	-0.00265247
85.124	-0.00206385	-0.00226151	-0.0021817	-0.00191662	-0.00181233	-0.00160935
85.211	-0.00208167	-0.00229326	-0.00217394	-0.00191438	-0.00182994	-0.00165298
85.272							-0.00192886	-0.00221986	-0.0026485
85.306	-0.00207447	-0.00231811	-0.00217506	-0.00190656	-0.00184934	-0.00170502
85.397	-0.00207541	-0.00234547	-0.00216751	-0.00189657	-0.0018668	-0.00175426
85.423							-0.0019879	-0.00219444	-0.00263927
85.423							-0.0019879	-0.00219444	-0.00263927
85.488	-0.00207107	-0.00237031	-0.0021597	-0.00188362	-0.00188462	-0.00180372
85.548							-0.00204074	-0.00218155	-0.00262807
85.609	-0.00206714	-0.00240675	-0.00213929	-0.0018654	-0.00190746	-0.00186724
85.669							-0.00208678	-0.00215882	-0.0026252
85.73	-0.00205206	-0.0024334	-0.00212474	-0.00184498	-0.00193379	-0.00192913
85.757							-0.00212731	-0.00215935	-0.00261835
85.818	-0.00203883	-0.00244752	-0.00211638	-0.00183128	-0.00195534	-0.00197233
85.848							-0.00216731	-0.00215898	-0.0026139
85.909	-0.00202566	-0.00246059	-0.00210557	-0.00181969	-0.00197897	-0.00201433
85.969							-0.00221958	-0.00216384	-0.00260958
86.03	-0.00200615	-0.00247389	-0.00208918	-0.00180825	-0.00201288	-0.00206582
86.09							-0.00227147	-0.00217727	-0.0026072
86.094	-0.00199643	-0.00247468	-0.0020858	-0.00180566	-0.00203339	-0.0020926
86.181							-0.00231081	-0.00219394	-0.00260674
86.215	-0.00198527	-0.00247046	-0.00208264	-0.00181028	-0.00207494	-0.00214111
86.302							-0.00236194	-0.00222316	-0.00260762
86.333	-0.00197495	-0.00246246	-0.00207834	-0.00182127	-0.00211658	-0.00218516
86.393							-0.00239891	-0.00224936	-0.00260961
86.428	-0.00197112	-0.00245271	-0.00207628	-0.00183703	-0.00215037	-0.00221902
86.484							-0.0024389	-0.00228513	-0.00260932
86.518	-0.0019689	-0.00244101	-0.00207578	-0.00185605	-0.00218195	-0.00225015
86.579							-0.00247695	-0.00232188	-0.00261149
86.64	-0.00197111	-0.00242314	-0.00207664	-0.00188932	-0.00222244	-0.00229066
86.696							-0.00252344	-0.00236836	-0.00261699
86.761	-0.00198992	-0.00240804	-0.0020713	-0.00193452	-0.002255	-0.00232582
86.818							-0.00257524	-0.00242569	-0.00261887
86.822	-0.00199486	-0.00239785	-0.00207309	-0.00195678	-0.00227105	-0.00234397
86.878							-0.00260027	-0.0024609	-0.00261539
86.909	-0.001996	-0.00238131	-0.00208334	-0.00198839	-0.00229409	-0.00237134
87	-0.00202137	-0.00236977	-0.00207659	-0.00203145	-0.0023068	-0.00239067
87.034							-0.00267037	-0.00254038	-0.00261328
87.095	-0.00203106	-0.00235453	-0.00208727	-0.00207285	-0.00232286	-0.00241588
87.125							-0.00271732	-0.00258362	-0.00261
87.212							-0.00276095	-0.0026278	-0.00260407
87.216	-0.00205772	-0.00233773	-0.00209148	-0.00213048	-0.00233279	-0.00243925
87.303							-0.00280393	-0.00267326	-0.00259889
87.307	-0.00208006	-0.00232535	-0.00209498	-0.00217377	-0.00233583	-0.00245295
87.398	-0.00210304	-0.00231312	-0.00209993	-0.00221563	-0.00233607	-0.0024636
87.424							-0.00287282	-0.00272529	-0.00258523
87.489							-0.00290267	-0.00275116	-0.00258399
87.519	-0.00213358	-0.00229749	-0.00210904	-0.00226738	-0.00233356	-0.00247382
87.579							-0.0029441	-0.00278164	-0.0025843
87.606	-0.00216054	-0.00228201	-0.00211647	-0.00229894	-0.0023277	-0.00247092
87.728							-0.00302554	-0.00282835	-0.00256808
87.732	-0.00219289	-0.00226517	-0.0021332	-0.00233851	-0.00232224	-0.0024704
87.788	-0.00220389	-0.00226316	-0.00213756	-0.00235523	-0.00232299	-0.00247769
87.822							-0.00306963	-0.00285313	-0.00256457
87.91	-0.00223676	-0.00224934	-0.00215569	-0.00237952	-0.00231933	-0.00247188
87.94							-0.00311589	-0.00288022	-0.00256916
88.004	-0.00226488	-0.00223752	-0.00218131	-0.00238941	-0.00231546	-0.00245436
88.031							-0.00314009	-0.00289736	-0.00258581
88.122							-0.00317047	-0.00292186	-0.0025873
88.126	-0.00230154	-0.00223129	-0.00221449	-0.00239716	-0.00231611	-0.00243576
88.213							-0.00318768	-0.0029438	-0.00260418
88.243	-0.00233973	-0.00222997	-0.00222765	-0.00240231	-0.00232296	-0.0024356
88.334							-0.00320014	-0.00297567	-0.00263434
88.338	-0.0023755	-0.00223399	-0.0022593	-0.00240209	-0.0023292	-0.0024173
88.399	-0.00240087	-0.00223755	-0.00227475	-0.00240213	-0.00233482	-0.0024099
88.459							-0.0032	-0.00301161	-0.00267626
88.516							-0.00320175	-0.00303207	-0.0026917
88.52	-0.00245683	-0.00225009	-0.00230916	-0.00240335	-0.00234904	-0.00239321
88.607	-0.00250179	-0.0022634	-0.00233521	-0.0024065	-0.00236191	-0.00238114
88.668							-0.00317315	-0.00307551	-0.00277065
88.698	-0.00255367	-0.00227739	-0.00235975	-0.00241228	-0.00237624	-0.00236969
88.728							-0.0031623	-0.00309473	-0.00280083
88.79	-0.00261134	-0.00228961	-0.0023815	-0.00242128	-0.00239042	-0.00235715
88.85							-0.00313096	-0.00312908	-0.00286899
88.884	-0.0026715	-0.00231402	-0.00241155	-0.00243595	-0.0024113	-0.00234357
88.945							-0.00310917	-0.00315672	-0.00292141
89.005	-0.00275074	-0.00235643	-0.00245465	-0.00246182	-0.00244594	-0.00233055
89.062							-0.00308404	-0.00319023	-0.00298903
89.123	-0.00283179	-0.00239246	-0.00248976	-0.0024928	-0.00247884	-0.00231689
89.153							-0.00305837	-0.00320603	-0.00303803
89.248	-0.0029188	-0.00242743	-0.0025216	-0.00253252	-0.00251294	-0.00229906
89.275							-0.00303659	-0.00323767	-0.00311312
89.309	-0.00295681	-0.00245529	-0.00254519	-0.00255221	-0.00253711	-0.00229997
89.4							-0.00300788	-0.00325354	-0.00317701
89.457	-0.00305194	-0.00250146	-0.00258424	-0.0026074	-0.00258138	-0.00228464
89.487							-0.00298312	-0.00324885	-0.00320516
89.552	-0.00310375	-0.00253853	-0.00261769	-0.00263934	-0.002616	-0.00228862
89.608							-0.00296064	-0.00325962	-0.00325958
89.643	-0.00315572	-0.00256409	-0.00264151	-0.0026766	-0.00263971	-0.00227939
89.703							-0.00294097	-0.00325897	-0.00329079
89.704	-0.00318607	-0.00258366	-0.00266166	-0.00269845	-0.0026578	-0.00227967
89.794							-0.00292223	-0.00325467	-0.00331464
89.855	-0.00325128	-0.00263016	-0.00271638	-0.00274634	-0.00270108	-0.00228779
89.912	-0.00326913	-0.00264734	-0.00273914	-0.00275793	-0.00271877	-0.00229883
89.912							-0.00289872	-0.00324595	-0.00333881
90.007							-0.0028804	-0.00323711	-0.00335384
90.037	-0.00330263	-0.002681	-0.00278821	-0.00278064	-0.0027533	-0.00232302
90.098							-0.00286619	-0.00322304	-0.00335949
90.128	-0.00333079	-0.00270376	-0.00282807	-0.00280236	-0.00277233	-0.00232837
90.219	-0.0033445	-0.00272567	-0.00286576	-0.00281104	-0.00279484	-0.0023506
90.219							-0.0028429	-0.00320995	-0.00337423
90.28	-0.00336341	-0.00274132	-0.00290202	-0.0028231	-0.0028053	-0.00234846
90.31							-0.00283592	-0.00319388	-0.00337292
90.428	-0.00337608	-0.00277713	-0.00297391	-0.00282705	-0.00283972	-0.00238281
90.428							-0.00281801	-0.00317543	-0.00338213
90.523							-0.00281806	-0.00315984	-0.00337904
90.55	-0.00337775	-0.00280777	-0.0030343	-0.00282411	-0.00286885	-0.00241406
90.614							-0.00281586	-0.00314502	-0.0033806
90.644	-0.00337062	-0.00283232	-0.00307245	-0.0028215	-0.00289281	-0.00244438
90.736	-0.00336654	-0.00285872	-0.00312522	-0.00281283	-0.00291632	-0.00246608
90.766							-0.00282667	-0.00312584	-0.00337569
90.823	-0.00335607	-0.00288463	-0.00316381	-0.00280772	-0.00293999	-0.00249273
90.853							-0.00281811	-0.00310479	-0.00339167
90.914	-0.00333926	-0.00291047	-0.00318606	-0.00281197	-0.00296296	-0.00252508
90.944							-0.00282691	-0.00309349	-0.00339234
91.009	-0.00332737	-0.00294238	-0.00323369	-0.00280412	-0.00299072	-0.00255245
91.069							-0.00284735	-0.00308881	-0.00338404
91.13	-0.00331091	-0.00298607	-0.00328805	-0.0027982	-0.00302877	-0.00259146
91.187							-0.00286244	-0.00308319	-0.00338111
91.251							-0.00287191	-0.00308377	-0.00337656
91.252	-0.00329445	-0.00302847	-0.00332778	-0.00280265	-0.00306445	-0.0026349
91.312	-0.00328763	-0.00304898	-0.00334493	-0.00280692	-0.00308144	-0.00265745
91.342							-0.00288833	-0.00309275	-0.00336321
91.434	-0.00327577	-0.00308316	-0.00337087	-0.00282159	-0.00310847	-0.00270485
91.46							-0.00290067	-0.00309398	-0.00335423
91.525	-0.00327287	-0.00311847	-0.00339552	-0.00283116	-0.00313856	-0.00274499
91.582							-0.00291329	-0.00310242	-0.0033358
91.616	-0.00326909	-0.00313647	-0.00340933	-0.00284627	-0.00315295	-0.00278444
91.676							-0.00292735	-0.00311997	-0.00331238
91.707	-0.00326908	-0.00315786	-0.00342424	-0.00286139	-0.00317165	-0.00282759
91.798							-0.00294022	-0.00313885	-0.00328107
91.828	-0.00326968	-0.00317218	-0.00344117	-0.00288244	-0.00318718	-0.00288673
91.855							-0.00294905	-0.00315061	-0.00326452
91.92	-0.00327602	-0.00319632	-0.00345143	-0.00290031	-0.00321038	-0.00293819
92.007							-0.00297201	-0.00317632	-0.0032212
92.041	-0.00327624	-0.00318724	-0.00346906	-0.00291971	-0.00321497	-0.00300096
92.098							-0.00298781	-0.00318701	-0.00319679
92.132	-0.00327259	-0.00316157	-0.00348976	-0.00293025	-0.00321119	-0.00304691
92.189							-0.00300344	-0.00319395	-0.00317283
92.22	-0.00326907	-0.00313598	-0.00351178	-0.00293962	-0.00321078	-0.00309294
92.31							-0.00302473	-0.00319947	-0.00314096
92.315	-0.00326485	-0.00310806	-0.00353648	-0.00294929	-0.00321286	-0.00314364
92.371							-0.00303584	-0.00320126	-0.00312476
92.406	-0.00326016	-0.00308121	-0.00356039	-0.00295835	-0.00321642	-0.00319266
92.496							-0.00305958	-0.00320376	-0.00309125
92.527	-0.00325282	-0.0030454	-0.00359208	-0.00297028	-0.00322247	-0.003258
92.644							-0.00308945	-0.00320578	-0.00305115
92.649	-0.00324415	-0.00300916	-0.00362378	-0.00298227	-0.00322925	-0.00332357
92.705							-0.00310224	-0.00320652	-0.00303461
92.709	-0.00323944	-0.00299126	-0.00363929	-0.00298817	-0.00323266	-0.00335565
92.827							-0.00312886	-0.00320816	-0.00300131
92.831	-0.00322904	-0.00295471	-0.00367075	-0.00300022	-0.00323953	-0.00342036
92.922	-0.00322064	-0.00292724	-0.00369422	-0.00300925	-0.00324446	-0.00346813
92.922							-0.00315025	-0.00320963	-0.00297552
93.013	-0.00321176	-0.00289962	-0.00371778	-0.00301834	-0.00324918	-0.00351543
93.043							-0.00317843	-0.00321192	-0.00294263
93.131							-0.00319932	-0.00321386	-0.00291897
93.165	-0.00319608	-0.00285313	-0.00375741	-0.00303357	-0.00325644	-0.00359318
93.226	-0.00318955	-0.00283433	-0.00377347	-0.00303971	-0.00325912	-0.00362395
93.252							-0.00322855	-0.00321697	-0.00288665
93.343							-0.00325079	-0.00321965	-0.00286262
93.347	-0.00317623	-0.00279667	-0.00380574	-0.0030519	-0.00326399	-0.00368441
93.439	-0.00316595	-0.00276785	-0.00383059	-0.00306111	-0.0032673	-0.00372965
93.465							-0.00328078	-0.00322365	-0.0028308
93.499	-0.00315905	-0.00274861	-0.00384719	-0.00306717	-0.00326925	-0.00375932
93.556							-0.00330313	-0.0032269	-0.00280747
93.621	-0.00314514	-0.00270957	-0.00388116	-0.0030792	-0.00327274	-0.00381835
93.677							-0.003333	-0.00323161	-0.00277662
93.742	-0.0031312	-0.00266985	-0.00391599	-0.00309102	-0.00327559	-0.00387688
93.769							-0.00335528	-0.00323535	-0.00275398
93.803	-0.0031243	-0.00264979	-0.00393373	-0.00309681	-0.00327681	-0.0039059
93.89							-0.00338449	-0.00324049	-0.00272444
93.894	-0.00311404	-0.00261941	-0.00396076	-0.00310533	-0.00327839	-0.00394921
93.981							-0.00340621	-0.00324448	-0.00270269
94.046	-0.00309742	-0.00256821	-0.00400693	-0.00311904	-0.00328051	-0.00402079
94.073							-0.00342824	-0.00324856	-0.00268063
94.107	-0.00309075	-0.00254695	-0.00402626	-0.00312448	-0.00328122	-0.00405006
94.198	-0.00308104	-0.00251509	-0.00405551	-0.00313239	-0.00328221	-0.00409354
94.228							-0.00346414	-0.00325529	-0.00264504
94.285							-0.00347662	-0.00325761	-0.00263281
94.32	-0.00306869	-0.00247262	-0.00409518	-0.0031425	-0.00328354	-0.00415091
94.411	-0.00305963	-0.00244019	-0.00412582	-0.00314989	-0.00328458	-0.00419432
94.411							-0.00350512	-0.00326274	-0.00260472
94.532							-0.00353178	-0.00326727	-0.00257861
94.563	-0.00304511	-0.00238548	-0.00417844	-0.0031618	-0.00328666	-0.00426705
94.594	-0.00304238	-0.00237464	-0.00418909	-0.00316408	-0.00328716	-0.00428142
94.62							-0.00355078	-0.00327025	-0.00256005
94.714							-0.00357073	-0.00327309	-0.00254055
94.745	-0.00302879	-0.00231931	-0.00424377	-0.0031754	-0.00329003	-0.00435454
94.832							-0.00359477	-0.00327611	-0.0025173
94.837	-0.00302112	-0.00228614	-0.00427725	-0.00318187	-0.00329216	-0.00439823
94.954							-0.00362019	-0.00327872	-0.00249253
94.958	-0.00301094	-0.00224073	-0.00432349	-0.00319048	-0.00329549	-0.00445799
95.019	-0.00300626	-0.00221861	-0.00434647	-0.00319454	-0.0032974	-0.00448708
95.049							-0.00363901	-0.00328018	-0.00247427
