# Supplementary material for: The alpha/B.1.1.7 SARS-CoV-2 variant exhibits significantly higher affinity for ACE-2 and requires lower inoculation doses to cause disease in K18-hACE2 mice
Source: eLife. 2021 Nov 25;10:e70002. doi: 10.7554/eLife.70002 (PMC8635972; doi:10.7554/eLife.70002)
Supplement: Figure 2—source data 1. [file elife-70002-fig2-data1.xlsx]

## Sheet: Fig. 2 Weight progression
	B.1.1.7 (low)									B.1 (low)									B.1.1.7 (high)									B.1 (high)
0	100	100	100	100	100	100	100	100	100	100	100	100	100	100	100	100	100	100	100	100	100	100	100					100	100	100	100	100
1	94.3396	65.2027	99.6491	98.4436	100	99.5495	95.7854	101.796	101.515	100	97.3684	100.439	99.308	104.225	101.77	98.2609	102.198	97.8723	100.488	98.4375	96.1832	98.5663	96.8127					100.781	95.8159	98.8827	99.4444	101.754
2	95.0943	98.3108	95.7895	98.8327	101.596	100	97.318	102.395	100.505	100	96.4912	100.877	97.5778	101.409	103.54	100	102.198	97.8723	101.463	99.4792	86.6412	96.7742	94.4223					101.953	99.5816	100.559	99.4444	100.585
3	98.4906	98.9865	95.7895	97.6654	101.064	100	98.4674	105.389	97.4748	100.493	96.4912	99.5614	98.2699	100.704	103.54	96.9565	102.747	95.7447	102.439	96.875	80.1527	97.1326	93.6255					101.562	102.092	98.324	104.444	100
4	100.377	99.3243	97.5439	97.6654	104.787	101.802	99.2337	103.593	104.04	100.493	99.5614	100.439	99.308	103.521	107.965	101.304	104.945	102.66	100	98.4375	91.9847	97.8495	94.4223					102.344	103.347	102.235	101.111	103.509
5	101.509	100.676	97.193	98.0545	103.192	91.8919	101.533	105.988	106.566	103.941	98.6842	101.316	100.692	104.578	111.062	99.1304	107.143	105.851	100.976	98.9583	85.4962	98.5663	95.6175					105.469	104.603	93.8547	105.556	109.942
6	99.2453	99.6622	93.3333	88.3268	85.1064	85.1351	102.299	89.2216	105.05	100.985	99.5614	105.263	102.422	107.394	110.177	100	110.44	109.575	92.6829	83.3333	84.3512	99.6416	96.0159					104.297	104.184	84.9162	105.556	111.111
7	95.4717	89.8649	85.614	80.5447	78.1915	80.1802	91.5709	79.6407	94.4444	98.5222	101.316	101.754	101.384	104.93	110.177	96.5217	104.396	104.255	83.9024	79.1667	81.2977	96.0573	99.2032					103.125	104.184	78.7709	106.667	108.772

## Sheet: Fig. 2B Viral load
	Sars2	S18	Δ Ct	2^ Δ Ct
UK HI	11.28	10.13	1.15	0.450625
UK HI	10.79	10.23	0.56	0.678302
UK Hi	11.45	10.32	1.13	0.456916
Fr Hi	13.39	10.12	3.27	0.103665
Fr Hi	12.85	10.22	2.63	0.161544
Fr Hi	11.53	10.12	1.41	0.376312
UK Lo	11.34	10.13	1.21	0.432269
Fr Lo	12.55	10.21	2.34	0.19751
fr Lo	12.57	10.23	2.34	0.19751
fr Lo	14.45	10.17	4.28	0.0514744
UK lo	11.89	10.25	1.64	0.320856
uk lo	11.78	10.37	1.41	0.376312
uk lo	11.97	10.27	1.7	0.307786
fr lo	12.07	10.17	1.9	0.267943
fr lo	12.45	10.27	2.18	0.220676
Uk lo	11.49	10.64	0.85	0.554785
UK Hi	12.04	10.16	1.88	0.271684
UK HI	10.65	10.16	0.49	0.712025
Fr Hi	10.83	10.68	0.15	0.90125
Fr Hi	10.55	9.08	1.47	0.360982
fr Lo	11.65	10.78	0.87	0.547147
fr Lo	11.65	10.67	0.98	0.50698
fr Lo	14.46	10.58	3.88	0.0679209
Uk lo	10.24	10.12	0.12	0.920188
Uk lo	10.21	10.35	-0.14	1.10191
