# Supplementary material for: The alpha/B.1.1.7 SARS-CoV-2 variant exhibits significantly higher affinity for ACE-2 and requires lower inoculation doses to cause disease in K18-hACE2 mice
Source: eLife. 2021 Nov 25;10:e70002. doi: 10.7554/eLife.70002 (PMC8635972; doi:10.7554/eLife.70002)
Supplement: Figure 3—source data 1. [file elife-70002-fig3-data1.xlsx]

## Sheet: Fig.3A-C ELISA
wt	N439K	N501Y
61.2293	54.4608	40.2663
47.9117	35.8456	32.7816
57.171	41.4302	38.7909
24.9409	12.8263	22.634
80.8511	69.2168	68.118
73.2861	60.5902	54.516
81.3239	60.8627	67.8302
25.6895	3.65494	21.2666
71.3948	58.2293	57.5387
68.4397	53.008	58.5822
47.5965	36.1634	37.4595
95.9417	92.8717	91.2199
86.84	81.4302	53.7244
42.632	30.0341	21.3746
35.4216	22.5426	11.9108
41.6076	29.7616	23.3177
63.5146	48.8309	34.5808
54.5705	36.0726	33.9331
58.3136	45.1532	36.8118
91.253	87.9682	79.2371
80.9693	73.8933	63.9798
60.4413	56.3678	39.6186
83.9638	77.0715	55.3796
96.1781	94.8241	85.9662
97.0449	94.3246	87.0097
72.8526	57.4574	43.8287
25.6501	14.6425	9.24793
94.405	95.2327	73.9475
92.0804	85.1986	75.8546
58.6288	45.4711	40.4102
97.9905	97.0488	92.6952
61.7415	57.6844	45.8078
41.1347	47.4234	29.3631
85.2246	83.2009	72.3282
97.1237	94.5516	89.5286
76.0835	67.9909	60.6693
69.4247	54.8241	39.4027
54.1371	40.3859	33.2854
70.4492	51.2372	51.0975
97.2419	94.8241	91.1839
80.9299	65.7662	62.5765
93.223	85.3349	82.2598
60.7959	45.5619	39.9424
65.8392	47.6504	34.3649
37.7069	27.8547	28.7154
68.9519	58.5471	50.9536
90.8195	85.5619	80.1727
0	0	8.60022
88.6525	77.1623	76.3584
37.2734	16.0045	27.6358
82.3089	67.5369	69.7373
98.5816	96.7764	93.4869
96.0205	87.4688	88.629
76.0835	53.689	63.3681
83.0181	69.7616	64.1598
98.227	96.5948	96.1857
51.6155	38.8422	46.8154
74.9803	65.9932	67.2184
74.5863	59.4552	44.5484
79.472	62.1793	57.7906
55.0827	25.3575	29.543
61.4657	44.79	44.8723
76.6351	56.8218	53.6164
98.5422	96.4586	93.4509
80.1813	61.1805	56.9989
86.5248	70.4427	66.7866
60.3625	48.7855	34.4368
66.6667	57.5936	45.7359
65.3664	59.5006	46.9953
73.3649	54.2792	58.7621
95.3161	92.3748	82.0116
54.9505	56.563	44.4101
94.5164	93.9681	92.031
85.6436	81.4492	71.6054
85.4532	79.5524	68.6654
77.4562	79.173	64.5648
96.6108	95.3338	90.5222
91.9269	89.3778	82.2824
89.3374	88.5433	76.2476
64.2041	62.2155	38.9942
96.6489	95.4856	90.5609
89.5659	83.4219	75.9768
46.9916	40.3263	28.3172
25.2475	15.4401	6.0735
58.1112	52.0865	42.8627
27.4181	32.2838	16.2089
59.2917	50.4552	46.9633
4.60777	3.71775	5.60928
78.789	67.1851	60.3869
41.051	34.5979	28.0464
71.5537	58.5357	45.2998
81.0739	74.4689	59.6518
58.6063	48.2929	32.147
77.2658	66.9196	45.3385
99.4669	99.5448	98.8395
53.8842	46.4719	35.1644
32.2925	28.1108	25.8414
31.6832	29.6662	20.3095
79.2079	66.0091	63.1335
97.4867	94.7269	93.5783
68.0884	60.3566	50.3288
56.6641	35.736	29.6712
89.604	84.1806	76.4797
75.019	63.2777	48.0851
97.3344	93.2473	86.8472
41.8888	37.7845	20.1547
78.6367	65.0986	58.4139
87.243	79.0592	67.6983
85.0724	74.0516	66.6151
96.8774	92.868	87.6596
99.0861	98.1411	95.8607
62.1097	55.7284	41.7021
74.3717	64.1502	52.3791
91.0891	80.9939	71.1799
84.0823	75.0759	66.0735
87.243	80.9939	66.4217
69.2689	68.5888	61.7795
88.1569	82.7011	70.3675
90.9368	85.8498	82.1663
93.6405	89.8331	88.6654
92.3077	84.3703	84.8356
62.3762	45.5615	57.176
98.5529	98.2929	96.8665
83.8157	75.607	76.0928
43.2216	36.4947	40.1161
82.7113	69.4992	66.8085
95.4684	93.0956	87.3114
96.1919	94.3475	93.0367
80.8454	65.7815	65.029
92.4981	81.9423	84.2166
88.1188	77.4659	71.9923
91.3937	81.6009	79.381
98.134	97.1548	96.5184
95.0876	87.8983	88.8975
65.2323	59.1047	59.4584
85.0343	77.8073	75.2805
61.6146	60.8118	78.646
73.9147	66.654	67.7756
93.6405	91.7299	89.0909
91.3937	77.39	66.5377

## Sheet: Fig.3D PRNT
	B.1.1.7										FR-4286 (wt)
	500	501	532	538	568	571	605	609	628	632	500	501	532	538	568	571	605	609	628	632
1:20	100	100	100	100	100	100	100	100	100	100	100	100	100	100	100	100	100	100	100	100
1:40	100	100	100	100	100	100	100	100	100	100	100	100	100	100	100	100	100	100	100	100
1:80	87.5	100	100	100	100	100	100	100	100	100	87.5	100	100	100	100	100	100	100	100	100
1:160	100	100	100	100	100	100	100	100	100	37.5	37.5	100	100	100	87.5	100	100	100	100	62.5
1:320	37.5	100	87.5	100	75	87.5	100	100	100	37.5	0	100	100	100	37.5	100	87.5	87.5	100	0
1:640	37.5	100	75	62.5	62.5	87.5	75	62.5	75	12.5	0	87.5	87.5	62.5	0	50	12.5	12.5	100	0
1:1280	25	50	37.5	25	62.5	62.5	50	50	37.5	12.5	0	75	0	12.5	0	25	0	0	50	0
1:2560	0	62.5	12.5	12.5	12.5	25	25	37.5	50	0	0	12.5	0	0	0	0	0	0	12.5	0
1:5120	0	50	0	0	0	0	12.5	12.5	12.5	0	0	0	0	0	0	0	0	0	0	0
NS	0	0	0	0	0	0	0	0	0	0	0	0	0	0	0	0	0	0	0	0
