# Supplementary material for: The alpha/B.1.1.7 SARS-CoV-2 variant exhibits significantly higher affinity for ACE-2 and requires lower inoculation doses to cause disease in K18-hACE2 mice
Source: eLife. 2021 Nov 25;10:e70002. doi: 10.7554/eLife.70002 (PMC8635972; doi:10.7554/eLife.70002)
Supplement: Figure 4—source data 1. [file elife-70002-fig4-data1.xlsx]

## Sheet: Fig.4A-B Mice sera
Serum concentration (dilution)	RBD wt (RBD imm.)			RBD N439K (RBD imm.)			RBD N501Y (RBD imm.)			RBD wt (spike imm.)			RBD N439K (spike imm.)			RBD N501Y (spike imm.)
160	80.1047	83.2461	90.5759	78.6096	82.8877	90.9091	83.0435	86.5217	93.0435	92.7419	92.3387	91.9355	93.0233	91.6279	90.6977	93.2735	93.2735	91.4798
640	98.5394	98.8315	98.7342	98.2418	98.3517	98.5714	98.0583	98.665	98.5437	98.9817	98.778	96.945	98.5761	98.5761	97.1522	98.6395	98.5261	96.4853
2560	98.1418	97.8825	98.0985	98.4828	96.3855	97.6796	97.9202	95.0534	96.0652	91.8688	91.5834	92.6296	83.3489	83.7699	90.5987	84.0697	86.9944	85.8121
10240	97.4688	75.2172	82.3574	97.144	65.6893	78.4844	95.9826	66.7473	73.1849	33.9272	40.4196	40.7363	22.3443	28.7749	41.2291	28.5865	34.7574	46.0443
40960	70.316	15.9142	2.10685	65.3605	7.79781	15.4781	63.2777	7.84016	22.5594	4.80984	7.53169	7.15884	0	0	4.64481	0	0	2.3523
163840	18.0286	3.40784	0	9.09091	0	0	8.13772	0	0	0	0.635677	0.913786	0	0	0	0	0	0
655360	4.65804	0	0	2.10487	0	0	0	0	0	0	0	8.31933	0	0	0	0	0	0
2621440	1.46451	0.863688	7.77319	0	0	0	0	4.83701	0	0	0	14.3117	0	0	0	0	14.1332	3.45477

## Sheet: Fig.4C-D mAb correlation
Neutralization curves RBD wt
Antibody concentration (µg/ml)	RBD clone 1			RBD clone 5			RBD clone 15			RBD clone 17			RBD clone 19			RBD clone 20			RBD clone 26			RBD clone 28			RBD clone 30			RBD clone 31			Spike clone 9			Spike clone 16			Spike clone 43			Spike clone 48			Spike clone 49			Spike clone 53			Spike clone 56
20	62.8077	51.6313	61.1947	73.4731	85.8698	81.3485	96.0802	97.9454	95.9248	4.87694	9.13453	2.82176	40.8387	51.764	30.3755	26.8915	24.486	16.6506	95.6861	96.5363	94.1977	94.0633	97.1361	88.797	95.9828	97.7329	97.6927	95.1585	98.1499	96.2844	31.0195	29.2736	20.969	31.9661	26.4831	23.5926	17.4648	31.7016	33.4517	16.6094	23.8917	33.0401	4.1919	26.5884	13.3829	98.5834	99.439	97.5403	1.74974
5	32.4175	16.8468	21.1464	34.4006	52.8216	45.1513	88.2296	93.1739	88.5131	1.14587	4.64347	3.87978	22.4716	22.1812	14.4617	15.3157	6.93377	11.7664	75.3248	61.035	57.8562	45.0682	64.5029	40.5639	84.1398	86.1424	79.4763	88.6187	94.3178	88.1098	12.8473	10.6324	16.5578	7.89541	8.0375	13.4602	6.38779	10.8041	7.98809	9.8078	3.74865	4.39829	2.02312	6.7132	15.391	98.5705	99.1298	97.8637	4.51517
1.25	11.9242	6.745	4.36458	11.2138	16.0376	15.9565	71.9613	81.9795	72.165	0.017188	0	1.30851	6.43494	4.50471	7.18255	17.8191	0	6.52354	22.8254	20.1768	24.0768	17.0652	20.0087	11.2713	38.7079	41.9088	40.5203	74.5232	74.5959	58.1294	2.89545	1.35223	0	1.85748	5.16478	2.78121	3.61535	0	1.71306	1.40187	1.16162	2.89079	0	1.16029	0	97.8921	99.0312	96.584	1.95312
0.3125	14.0451	4.28828	5.69272	3.10815	2.34396	5.68019	34.8002	54.2306	40.3014	1.96985	0	0.830652	7.62158	0.122032	6.78295	15.5412	0.157162	5.23713	2.4558	10.8743	8.56194	7.17373	12.1377	2.54939	7.74746	13.3988	24.0083	36.2009	27.2979	20.792	2.99654	2.30629	7.19053	2.09917	2.16547	12.1824	3.07013	1.57961	0.988989	2.41685	0.84317	4.65987	0	0.821398	3.71294	97.521	98.2932	97.6629	3.78323
0.078125	20.2886	1.95332	1.20737	3.86107	5.63783	4.80207	13.281	19.0104	14.3873	8.4168	0	4.62092	6.51559	0	5.08062	17.0097	0.605653	5.90173	1.54769	8.94691	5.33433	2.43757	9.75479	5.49852	3.73548	7.93891	19.5935	14.3421	10.1768	12.7085	7.90862	0.77331	10.3465	3.65167	5.71308	11.9612	0.424023	4.90654	6.42884	0	3.56741	2.04887	0	2.06109	4.49224	87.2769	78.4302	78.7084	4.04632
0.019531	27.7974	1.13816	0.694971	6.82111	2.75588	2.0091	11.5875	4.15822	1.20303	10.2424	0	1.79778	11.2362	0	2.76725	17.0394	1.25673	2.11018	4.16079	10.5681	10.558	8.57476	9.33221	8.99232	5.49797	5.58029	25.8708	6.1682	2.65604	10.4297	10.1325	0.686144	11.8579	10.0611	2.99442	20.5243	7.29769	7.95088	1.12864	4.26301	3.85523	0	0.457611	1.4658	0	28.3888	25.9461	19.384	4.03836
Neutralization curves RBD N439K
Antibody concentration (µg/ml)	RBD clone 1			RBD clone 5			RBD clone 15			RBD clone 17			RBD clone 19			RBD clone 20			RBD clone 26			RBD clone 28			RBD clone 30			RBD clone 31			Spike clone 9			SPike clone 16			Spike clone 43			Spike clone 48			Spike clone 49			Spike clone 53			Spike clone 56
20	35.6292	45.325	50.9166	67.3277	79.2904	79.9558	94.2313	93.7028	95.36	12.7248	3.80167	4.70514	58.7677	53.7925	45.2176	40.3738	24.1657	27.6138	89.6267	91.664	92.9556	76.154	88.0207	86.0301	86.2092	94.394	90.8213	97.5584	94.0522	95.5364	28.9104	36.9536	38.7875	34.2018	55.7945	36.4408	37.3209	14.9549	34.5822	9.64719	20.7841	34.3704	16.9309	27.3541	36.0426	97.7739	96.8263	98.6912	0
5	9.74071	25.6983	9.24734	18.0963	54.0427	45.5834	84.4713	86.7628	83.8534	1.84449	3.90596	4.57716	30.1574	27.8705	21.0172	15.0446	12.581	7.29622	52.2351	56.727	52.6564	40.5338	44.1066	35.9521	80.8481	82.2864	81.6877	88.0357	87.4038	86.6994	13.7858	15.2934	25.5536	13.5764	23.4872	16.5579	10.0604	6.66844	21.7195	0.823177	6.67065	20.7936	4.79317	9.32617	25.6608	98.4359	96.9685	98.8919	0
1.25	2.39504	11.3237	1.99074	4.02023	23.0991	13.3999	62.514	73.9042	64.9621	0	0	4.73221	11.6286	7.70358	13.1251	3.46262	4.20056	12.0008	17.7057	22.4712	17.1772	12.6352	18.2301	9.93155	39.979	40.7294	39.55	41.2915	63.6664	55.817	6.06796	9.30462	12.5217	6.25059	18.1708	9.51118	2.95516	8.9519	11.349	0	4.50734	5.95062	1.07128	4.77262	7.11717	98.7159	96.0653	98.4352	0.338654
0.3125	4.47066	9.31981	0	4.53652	8.29876	0	30.7467	49.1445	29.8849	2.02617	2.77596	0	2.65935	0	1.83532	2.23723	2.61591	2.49476	3.26382	14.6994	2.27377	7.53028	5.84673	0	15.9175	13.475	8.81381	11.3397	25.6054	20.7152	1.97942	4.30288	1.72255	2.9393	4.19974	4.38677	0.132176	4.78842	5.71622	0	1.28858	5.06491	0.356924	1.73797	1.69453	97.2825	95.8498	96.7837	1.35631
0.078125	0.357771	9.4874	0.793651	1.86963	6.45625	0	2.84726	19.8746	3.92148	0	0.118343	4.54145	2.52949	1.26812	2.60141	5.24895	3.22028	5.8642	1.03779	12.2962	4.63002	5.32905	7.63407	5.09514	14.7992	8.19261	3.02326	1.40922	9.93584	7.1738	1.12084	5.30528	5.1797	2.74197	8.23729	5.72939	3.26894	6.73747	3.58284	0	2.92577	2.16796	1.23915	3.92031	0.70744	80.8801	82.6923	72.2554	2.47801
0.019531	3.75187	6.55977	3.63057	1.21803	8.03878	14.8089	5.40123	4.52605	6.61495	0	2.81598	2.78132	6.29314	7.62695	22.3494	1.85935	4.16262	9.57537	0.255247	4.31472	6.92245	9.64441	2.98223	5.1067	12.4591	0	1.61712	0.342466	1.87183	2.65936	2.47143	0.729695	9.68331	4.93771	3.45812	8.46529	8.5291	5.31915	5.55939	1.36452	6.97547	3.33333	2.21279	4.8746	0	44.786	29.4583	23.7357	3.35618
Neutralization curves RBD N501Y
Antibody concentration (µg/ml)	RBD clone 1			RBD clone 5			RBD clone 15			RBD clone 17			RBD clone 19			RBD clone 20			RBD clone 26			RBD clone 28			RBD clone 30			RBD clone 31			Spike clone 9			Spike clone 16			Spike clone 43			Spike clone 48			Spike clone 49			Spike clone 53			Spike clone 56
20	47.4799	49.5739	57.1293	78.3983	73.0541	78.0044	94.0735	93.0817	93.4234	6.27869	11.0933	7.75567	50.2173	48.452	33.8493	28.2875	22.6714	22.0323	93.0693	90.9974	92.2763	82.0803	82.9707	80.2054	92.9676	93.2746	96.0019	95.3933	92.4188	94.8699	25.4592	27.035	25.3646	18.7951	40.6998	35.3915	40.2127	32.4428	32.6786	4.37992	20.7122	11.045	12.2515	17.4782	28.171	95.6217	97.1211	98.004	1.37795
5	19.3072	19.7102	19.892	49.9978	43.1874	40.7513	83.2675	82.2465	78.7476	4.71195	1.88641	8.48708	30.4531	21.8108	12.6352	9.30736	5.52172	9.84178	65.2038	57.6764	52.8142	41.7934	43.1752	41.822	76.7356	76.1967	80.9496	91.6735	80.5814	82.6114	18.6894	6.89141	16.5219	9.61515	11.1503	8.26231	15.4103	15.4366	3.7081	4.86289	7.63597	7.99736	4.3104	2.41516	0	96.4248	96.0851	97.8738	9.49385
1.25	9.63416	12.1185	2.06358	22.5911	17.1327	8.98717	65.2901	66.3028	51.9022	4.34713	0	1.72484	17.8364	7.28906	2.14702	14.2278	1.28142	3.53118	34.5417	19.7296	22.8819	9.21688	12.7576	8.53256	38.6099	36.2286	39.0181	73.6272	54.682	61.4247	8.21646	0	8.08155	4.34439	2.5897	6.56353	5.93757	9.46868	0	0.715951	4.78178	0	4.49852	0.543478	0.864342	94.9275	95.0698	96.8808	11.9727
0.3125	5.7099	11.9449	3.35777	8.6087	6.75071	2.23827	38.2337	40.7388	23.4069	4.01794	0.058997	2.1112	11.1691	0	2.59826	8.41503	2.74336	6.15615	21.0238	10.906	8.64398	7.26872	6.69722	5.08594	17.1058	13.4227	11.1935	40.8238	23.026	18.083	4.42221	1.31219	2.76657	6.0521	0	3.25444	2.29548	8.08178	2.9316	0	2.63705	2.80329	0	1.58049	2.57872	94.7297	94.4476	95.3807	8.9193
0.078125	4.7722	13.6895	0.940179	4.97192	6.06799	0	13.9077	20.2379	8.86329	1.13081	0.668605	6.66024	5.39107	0	4.65693	6.02526	0	1.29142	15.3621	7.44566	5.08791	8.64524	3.74016	7.10734	9.98388	2.55905	6.28911	5.0066	6.4255	3.0634	5.19583	0	6.71296	6.623	2.82584	8.49118	5.0568	7.68464	0.686532	0	5.97643	6.24454	2.05773	0	0.59889	87.0282	78.3312	82.4725	15.0221
0.019531	8.53221	13.465	2.58056	8.48169	6.47662	0	11.6491	0.690846	6.04341	3.28773	1.19578	6.46404	3.25407	2.61607	3.96909	8.5914	1.35291	5.64579	19.7645	8.22629	11.0287	8.60462	3.76166	8.34464	11.5663	1.43147	2.5964	2.52931	6.9307	10.8032	9.70429	4.00336	7.06941	15.6518	5.5991	5.64903	11.1795	7.05904	0	12.6956	5.45238	14.8158	8.20488	3.93065	0.730689	48.0464	32.3271	36.9713	19.1664
Interpolated IC50
RBD wt																	Ambiguous
Best-fit values	RBD clone 1	RBD clone 5	RBD clone 15 (wt)	RBD clone 17	RBD clone 19	RBD clone 20	RBD clone 26	RBD clone 28	RBD clone 30	RBD clone 31	Spike clone 9	Spike clone 16	Spike clone 43	Spike clone 48	Spike clone 49	Spike clone 53 (wt)	Spike clone 56 (wt)	Spike clone 61			RBD wt	RBD N439K			RBD wt	RBD N501Y
IC50	14.92	6.025	0.4184	1.63e+30	33.72	4317	3.066	4.53	1.504	0.6408	105.3	190	53.67	56.43	290.2	0.03554	~ 1,894e+153	2.317		RBD clone 1*	14,92*	20*		RBD clone 1*	14,92*	20*
Normalized IC50 (max 20)	14.92	6.025	0.4184	20	20	20	3.066	4.53	1.504	0.6408	20	20	20	20	20	0.03554	20	2.317		RBD clone 5	6.025	7.25		RBD clone 5	6.025	6.187
95% CI (profile likelihood)																				RBD clone 15	0.4184	0.617		RBD clone 15	0.4184	0.7202
IC50	10,13 to 28,61	5,119 to 7,104	0,3512 to 0,4987	???	22,51 to 68,32	118,6 to ???	2,534 to 3,699	3,547 to 5,723	1,112 to 2,009	0,5297 to 0,7741	39,78 to 1861	32,40 to 11510977	32,35 to 159,8	33,53 to 144,9	52,49 to 60357	0,03293 to 0,03837	(Very wide)	1,999 to 2,685		RBD clone 17*	20*	20*		RBD clone 17*	20*	20*
																				RBD clone 19*	20*	17,81*		RBD clone 19*	20*	20*
Goodness of Fit																				RBD clone 20*	20*	20*		RBD clone 20*	20*	20*
R squared	0.7808	0.9744	0.9834	0.006728	0.8646	0.3563	0.9719	0.9481	0.945	0.9795	0.6552	0.4108	0.7852	0.8307	0.5336	0.9904	-0.01362	0.9825		RBD clone 26	3.066	4.077		RBD clone 26	3.066	3.113
																				RBD clone 28	4.53	6.293		RBD clone 28	4.53	6.323
RBD N439K	RBD clone 1	RBD clone 5	RBD clone 15 (wt)	RBD clone 17	RBD clone 19	RBD clone 20	RBD clone 26	RBD clone 28	RBD clone 30	RBD clone 31	Spike clone 9	Spike clone 16	Spike clone 43	Spike clone 48	Spike clone 49	Spike clone 53 (wt)	Spike clone 56 (wt)	Spike clone 61		RBD clone 30	1.504	1.64		RBD clone 30	1.504	1.765
IC50	26.32	7.25	0.617	23388	17.81	70.83	4.077	6.293	1.64	1.069	59.35	36.31	126.9	146.8	86.63	0.03206	4.569e+149	1.75		RBD clone 31	0.6408	1.069		RBD clone 31	0.6408	0.8034
Normalized IC50 (max 20)	20	7.25	0.617	20	17.81	20	4.077	6.293	1.64	1.069	20	20	20	20	20	0.03206	20	1.75		Spike clone 9*	20*	20*		Spike clone 9*	20*	20*
95% CI (profile likelihood)																				Spike clone 16*	20*	20*		Spike clone 16*	20*	20*
IC50	19,46 to 45,57	5,272 to 10,13	0,4930 to 0,7736	178,0 to ???	12,78 to 28,97	36,35 to 286,8	3,455 to 4,798	5,298 to 7,471	1,369 to 1,963	0,9012 to 1,267	36,32 to 129,2	22,13 to 92,04	41,17 to 2307	41,42 to 7544	40,56 to 442,2	0,02784 to 0,03685	???	1,375 to 2,230		Spike clone 43*	20*	20*		Spike clone 43*	20*	20*
Goodness of Fit																				Spike clone 48*	20*	20*		Spike clone 48*	20*	20*
R squared	0.8604	0.8999	0.9736	0.3784	0.8747	0.7941	0.9777	0.9686	0.9787	0.9832	0.8929	0.8315	0.6601	0.5753	0.7556	0.9674	-0.003343	0.9614		Spike clone 49*	20*	20*		Spike clone 49*	20*	20*
																				Spike clone 53	0.03554	0.03206		Spike clone 53	0.03554	0.02662
RBD 501Y	RBD clone 1	RBD clone 5	RBD clone 15 (wt)	RBD clone 17	RBD clone 19	RBD clone 20	RBD clone 26	RBD clone 28	RBD clone 30	RBD clone 31	Spike clone 9	Spike clone 16	Spike clone 43	Spike clone 48	Spike clone 49	Spike clone 53 (wt)	Spike clone 56 (wt)	Spike clone 61		Spike clone 56*	20*	20*		Spike clone 56*	20*	20*
IC50	20.25	6.187	0.7202	515875	28.71	220.6	3.113	6.323	1.765	0.8034	164.2	51.57	43.32	834381172738	50.49	0.02662	3.195e-12	2.67		Spike clone 61	2.317	1.75		Spike clone 61	2.317	2.67
Normalized IC50 (max 20)	20	6.187	0.7202	20	20	20	3.113	6.323	1.765	0.8034	20	20	20	20	20	0.02662	3.195e-12	2.67
95% CI (profile likelihood)																				Excluded values*
IC50	14,85 to 34,29	5,254 to 7,311	0,5832 to 0,8897	773,1 to 1,571e+026	19,33 to 55,20	57,26 to 4332	2,249 to 4,260	5,449 to 7,346	1,542 to 2,019	0,6356 to 1,018	60,95 to 1214	27,43 to 485,5	27,23 to 123,7	??? to +infinity	??? to 202,8	0,02310 to 0,03042	??? to 0,0001778	1,683 to 4,129
Goodness of Fit
R squared	0.8641	0.9754	0.9774	0.3194	0.8716	0.7019	0.928	0.9751	0.9884	0.9695	0.7695	0.6437	0.8035	0.03002	0.7274	0.9632	0.06083	0.8714
[truncated: 5 more columns]
