# Supplementary material for: The alpha/B.1.1.7 SARS-CoV-2 variant exhibits significantly higher affinity for ACE-2 and requires lower inoculation doses to cause disease in K18-hACE2 mice
Source: eLife journal article supplement (doi:10.7554/elife.70002), 2021-11-25
Supplement: supp [file elife-70002-supp-v2.zip]

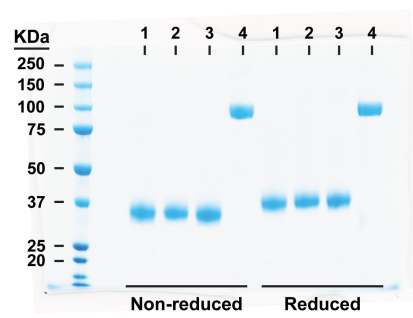

1. RBD wt
2. RBD N439K
3. RBD N501Y
4. ACE-2
